# Supplementary material for: Discovery of novel covalent selective estrogen receptor degraders against endocrine-resistant breast cancer
Source: PubMed Central journal article supplement — Acta Pharm Sin B. 2023 May 12;13(12):4963–82. doi: 10.1016/j.apsb.2023.05.005 (PMC10692362; doi:10.1016/j.apsb.2023.05.005), 2023-05-12

## Supporting Information for

### Original article

#### Discovery of novel covalent selective estrogen receptor degraders against endocrine-resistant breast cancer

Yubo Wang<sup>a,†</sup>, Jian Min<sup>b,†</sup>, Xiangping Deng<sup>a,†</sup>, Tian Feng<sup>a,†</sup>, Hebing Hu<sup>b</sup>, Xinyi Guo<sup>a</sup>, Yan Cheng<sup>a</sup>, Baohua Xie<sup>a</sup>, Yu Yang<sup>b</sup>, Chun-Chi Chen<sup>b</sup>, Rey-Ting Guo<sup>b,\*</sup>, Chune Dong<sup>a,c,\*</sup>, Hai-Bing Zhou<sup>a,c,d,\*</sup>

<sup>a</sup>*Department of Gynecological Oncology, Zhongnan Hospital of Wuhan University, School of Pharmaceutical Sciences, Wuhan University, Wuhan 430071, China*

<sup>b</sup>*State Key Laboratory of Biocatalysis and Enzyme Engineering, National & Local Joint Engineering Research Center of High-throughput Drug Screening Technology, Hubei Key Laboratory of Industrial Biotechnology, School of Life Sciences, Hubei University, Wuhan 430062, China*

<sup>c</sup>*Frontier Science Center for Immunology and Metabolism, State Key Laboratory of Virology, Provincial Key Laboratory of Developmentally Originated Disease, Key Laboratory of Combinatorial Biosynthesis and Drug Discovery (MOE) and Hubei Province Engineering and Technology Research Center for Fluorinated Pharmaceuticals, Wuhan University, Wuhan 430071, China*

<sup>d</sup>*Wuhan Research Center for Infectious Diseases and Cancer, Chinese Academy of Medical Sciences, Zhongnan Hospital of Wuhan University, Wuhan 430071, China*

Received 29 March 2023; received in revised form 3 May 2023; accepted 6 May 2023

\*Corresponding authors.

E-mail addresses: zhouhb@whu.edu.cn (Hai-Bing Zhou), cdong@whu.edu.cn (Chune Dong), guoreyting@hubu.edu.cn (Rey-Ting Guo).

†These authors made equal contributions to this work.

## **Table of contents**

**PART I. The synthesis and characterization of intermediate compounds and NOESY-NMR of regioisomer 29c and 29c'**

**PART II. The cell viability of the target compounds and the transcriptional curves of selected compounds for ER $\alpha$  antagonist activity**

**PART III. LC/MS analysis of mutant ER and compound 29c covalent profile**

**PART IV. ER $\alpha$  protein purification and crystallography**

**PART V. Proteomics experiments**

**PART VI.  $^1\text{H}$  NMR and  $^{13}\text{C}$  NMR spectra of final compounds**

**PART VII. HPLC and HMRS spectra of final compounds**

## **PART I. The synthesis and characterization of intermediate compounds**

### **General Procedure for intermediate compounds 13a-f.**

To a solution of 4-aminophenyl ethenesulfonate **11** (5 mmol) in 10 mL DCM were added Et<sub>3</sub>N (6 mmol) and corresponding acyl chloride (5.5 mmol). The mixture was stirred at room temperature for 12 h. The mixture was diluted with saturated aqueous solution of sodium hydrogen carbonate (20 mL) and extracted with DCM (3 × 30 mL). The organic layer was dried (Na<sub>2</sub>SO<sub>4</sub>), after filtration, and concentrated under reduced pressure. The residue was purified by silica gel column chromatography (petroleum ether and ethyl acetate, 10:1~1:1).

**4-Acrylamidophenyl ethenesulfonate (13a).** Compound **13a** was synthesized according to above general procedure as yellow solid, 80% yield. <sup>1</sup>H NMR (400 MHz, Acetone-*d*<sub>6</sub>) δ 9.62 (s, 1H), 8.02 - 7.69 (m, 2H), 7.42 - 7.17 (m, 2H), 7.08 - 6.94 (m, 1H), 6.58 - 6.21 (m, 4H), 5.75 (dt, *J* = 9.7, 2.4 Hz, 1H).

**(E)-4-(But-2-enamido)phenyl ethenesulfonate (13b).** Compound **13b** was synthesized according to above general procedure as white solid, 71% yield. <sup>1</sup>H NMR (400 MHz, Methanol-*d*<sub>4</sub>) δ 7.78 - 7.60 (m, 2H), 7.32 - 7.16 (m, 2H), 7.01 - 6.87 (m, 2H), 6.36 - 6.20 (m, 2H), 6.16 - 6.08 (m, 1H), 1.94 (dd, *J* = 6.9, 1.7 Hz, 3H).

**4-(3-Methylbut-2-enamido)phenyl ethenesulfonate (13c).** Compound **13c** was synthesized according to above general procedure as yellow solid, 77% yield. <sup>1</sup>H NMR (400 MHz, CDCl<sub>3</sub>) δ 7.69 (s, 1H), 7.58 (d, *J* = 8.6 Hz, 2H), 7.14 (d, *J* = 8.7 Hz, 2H), 6.73 - 6.58 (m, 1H), 6.34 (d, *J* = 16.6 Hz, 1H), 6.18 (d, *J* = 9.9 Hz, 1H), 5.74 (s, 1H), 2.21 (s, 3H), 1.88 (s, 3H).

**4-Propiolamidophenyl ethenesulfonate (13d).** Compound **13d** was synthesized according to above general procedure as yellow solid, 72% yield. <sup>1</sup>H NMR (400 MHz, Acetone-*d*<sub>6</sub>) δ 7.86 - 7.69 (m, 2H), 7.41 - 7.20 (m, 2H), 7.07 - 6.98 (m, 1H), 6.43 - 6.24 (m, 2H), 3.79 (s, 1H).

**4-(2-Chloroacetamido)phenyl ethenesulfonate (13e).** Compound **13e** was synthesized according to above general procedure as yellow solid, 67% yield. <sup>1</sup>H NMR (400 MHz, Acetone-*d*<sub>6</sub>) δ 9.60 (s, 1H), 7.88 - 7.70 (m, 2H), 7.37 - 7.21 (m, 2H), 7.06 - 6.97 (m, 1H), 6.43 - 6.23 (m, 2H), 4.26 (s, 2H).

**4-(2-Bromoacetamido)phenyl ethenesulfonate (13f).** Compound **13f** was synthesized according to above general procedure as yellow solid, 43% yield. <sup>1</sup>H NMR (400 MHz, Acetone-*d*<sub>6</sub>) δ 7.90 - 7.68 (m, 2H), 7.41 - 7.25 (m, 2H), 7.05 - 6.94 (m, 1H), 6.47 - 6.20 (m, 2H), 4.07 (s, 2H).

General Procedure for intermediate compounds **24a-e**

To a solution of 4-(4-(4-aminophenyl)furan-3-yl)phenol **23** (5 mmol) in 10 mL DCM were added Et<sub>3</sub>N (6 mmol) and corresponding acyl chloride (5.5 mmol). The mixture was stirred at 0 °C for 12 h. The mixture was diluted with saturated aqueous solution of sodium hydrogen carbonate (20 mL) and extracted with DCM (3 × 30 mL). The organic layer was dried (Na<sub>2</sub>SO<sub>4</sub>), after filtration, and concentrated under reduced pressure. The residue was purified by silica gel column chromatography (petroleum ether and ethyl acetate, 10:1~5:1).

***N*-(4-(4-(4-Hydroxyphenyl)furan-3-yl)phenyl)acrylamide (24a).** Compound **24a** was synthesized according to above general procedure as yellow solid, 33% yield. <sup>1</sup>H NMR (400 MHz, CDCl<sub>3</sub>) δ 9.30 (s, 1H), 8.25 (s, 1H), 7.93 - 7.71 (m, 4H), 7.30 - 7.22 (m, 2H), 7.20 - 7.14 (m, 2H), 7.01 - 6.94 (m, 2H), 6.20 - 6.12 (m, 1H), 5.82 - 5.70 (m, 1H).

***(E)*-*N*-(4-(4-(4-Hydroxyphenyl)furan-3-yl)phenyl)but-2-enamide (24b).** Compound **24b** was synthesized according to above general procedure as yellow solid, 42% yield. <sup>1</sup>H NMR (400 MHz, Acetone-*d*<sub>6</sub>) δ 9.27 (s, 1H), 8.50 (s, 1H), 7.82 - 7.61 (m, 4H), 7.25 - 7.17 (m, 2H), 7.14 - 7.08 (m, 2H), 6.96 - 6.86 (m, 1H), 6.84 - 6.79 (m, 2H), 6.18 - 6.11 (m, 1H), 1.87 (dd, *J* = 6.9, 1.7 Hz, 3H).

***N*-(4-(4-(4-Hydroxyphenyl)furan-3-yl)phenyl)-3-methylbut-2-enamide (24c).** Compound **24c** was synthesized according to above general procedure as yellow solid, 45% yield. <sup>1</sup>H NMR (400 MHz, Methanol-*d*<sub>4</sub>) δ 7.65 - 7.42 (m, 4H), 7.23 - 7.12 (m, 2H), 7.10 - 7.00 (m, 2H), 6.77 - 6.64 (m, 2H), 5.92 - 5.82 (m, 1H), 2.19 (s, 3H), 1.91 (s, 3H).

**2-Chloro-*N*-(4-(4-(4-hydroxyphenyl)furan-3-yl)phenyl)acetamide (24d).** Compound **24d** was synthesized according to above general procedure as yellow solid, 39% yield. <sup>1</sup>H NMR (400 MHz, CDCl<sub>3</sub>) δ 9.29 (s, 1H), 8.24 (s, 1H), 7.63 - 7.58 (m, 2H),

7.55 - 7.49 (m, 2H), 7.34 - 7.22 (m, 4H), 7.13 - 7.08 (m, 2H), 4.14 (s, 2H).

**2-Bromo-*N*-(4-(4-(4-hydroxyphenyl)furan-3-yl)phenyl)acetamide (24e).**

Compound **24e** was synthesized according to above general procedure as yellow solid, 53% yield. <sup>1</sup>H NMR (400 MHz, CDCl<sub>3</sub>) δ 9.27 (s, 1H), 8.22 (s, 1H), 7.60 - 7.55 (s, 2H), 7.52 - 7.47 (m, 2H), 7.32 - 7.19 (m, 4H), 7.11 - 7.05 (m, 2H), 4.04 (s, 2H).

**The NOESY-NMR of regioisomer 29c and 29c'.**

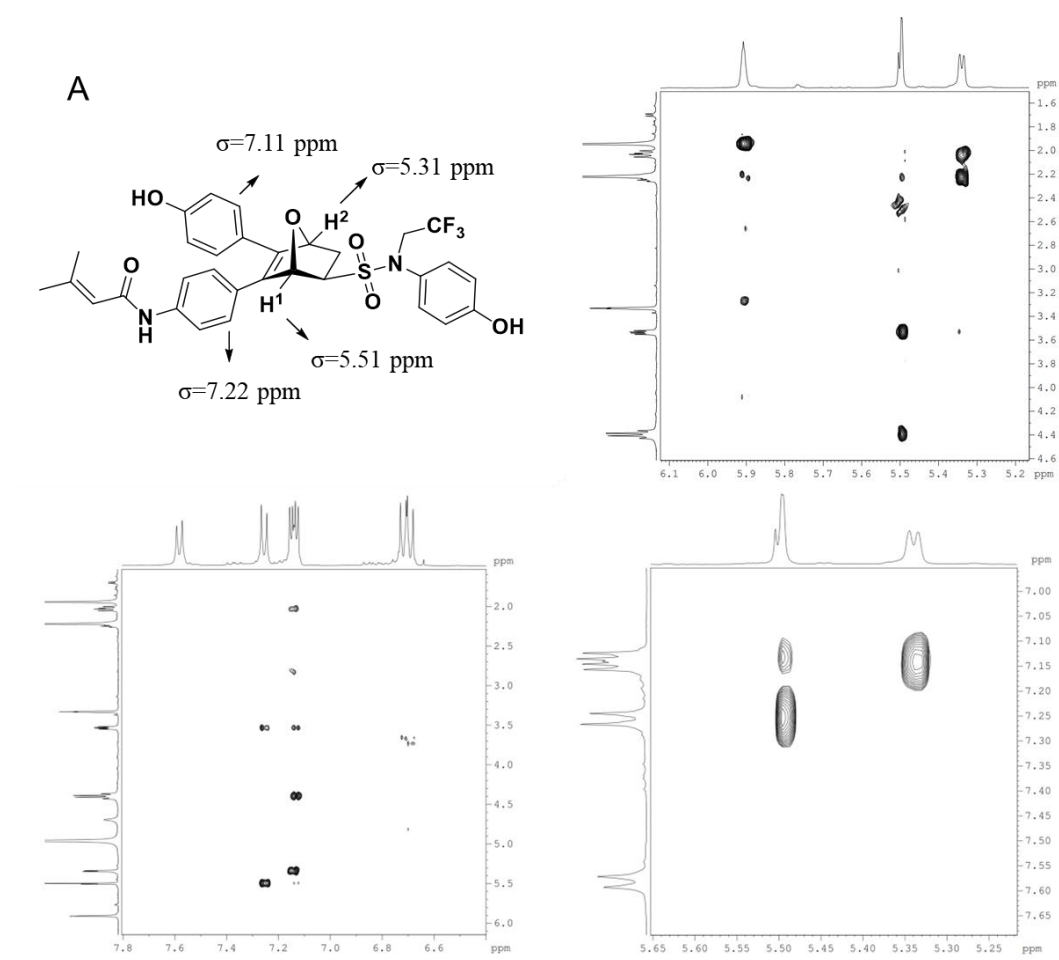

The peaks at δ 5.51 and δ 5.31 are the hydrogen atoms on the bridgehead carbons (H<sup>1</sup> and H<sup>2</sup>), it is evident that the H<sup>1</sup> interacts with the aniline moiety, and H<sup>2</sup> interacts with the phenol.

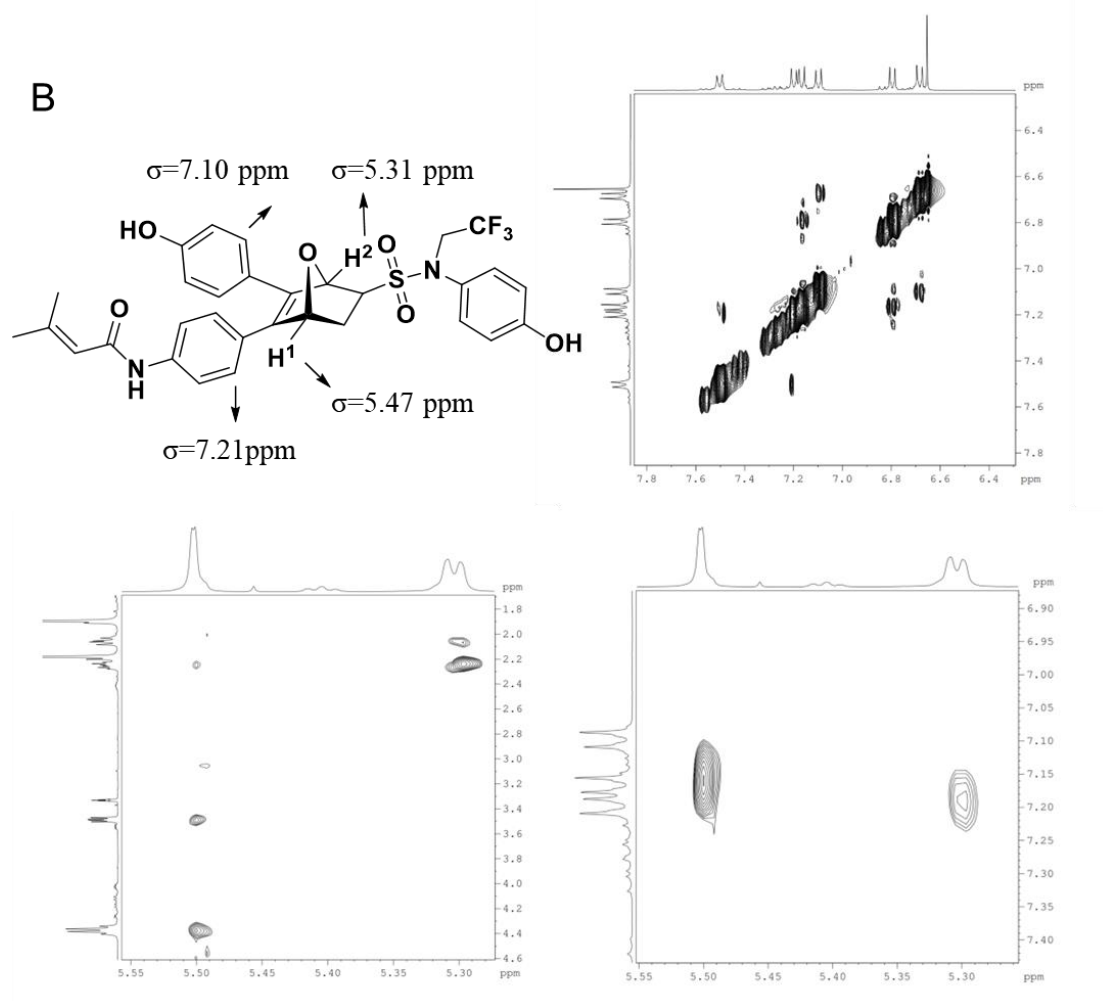

The peaks at  $\delta$  5.47 and  $\delta$  5.31 are the hydrogen atoms on the bridgehead carbons ( $\text{H}^1$  and  $\text{H}^2$ ), it is evident that the  $\text{H}^1$  interacts with the moiety, and  $\text{H}^2$  interacts with the phenol.

**Figure S1.** The characterization of the regioisomers **29c** and **29c'**. (A) NOESY-NMR of compound **29c**; (B) NOESY-NMR of compound **29c'**.

## PART II. The cell viability of the target compounds and the transcriptional curves of selected compounds for ER $\alpha$ antagonist activity

**Table S1.** The cell viability of the target compounds on MCF-10A cells ( $\text{IC}_{50}$ ,  $\mu\text{M}$ )<sup>a</sup>.

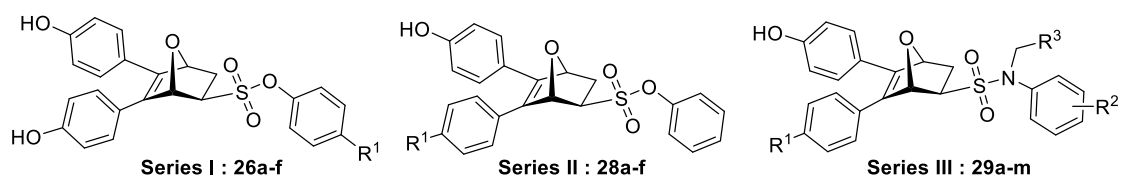

| Entry           | Cmpd.       | R <sup>1</sup>                                                                      | R <sup>2</sup> | R <sup>3</sup>  | MCF-10A cells (IC <sub>50</sub> ,<br>μM) | TI <sup>b</sup> |
|-----------------|-------------|-------------------------------------------------------------------------------------|----------------|-----------------|------------------------------------------|-----------------|
| 1               | <b>26a</b>  |    | /              | /               | 19.97 ± 3.61                             | 2.59            |
| 2               | <b>26b</b>  |    | /              | /               | 27.31 ± 2.94                             | 2.97            |
| 3               | <b>26c</b>  |    | /              | /               | 43.77 ± 2.85                             | 13.85           |
| 4               | <b>26d</b>  |    | /              | /               | 39.21 ± 2.67                             | 21.91           |
| 5               | <b>26e</b>  |    | /              | /               | 15.31 ± 1.93                             | 4.48            |
| 6               | <b>26f</b>  |    | /              | /               | 5.16 ± 0.88                              | 7.37            |
| 7 <sup>c</sup>  | <b>28a</b>  |    | /              | /               | 15.86 ± 2.20                             | 3.13            |
| 8 <sup>c</sup>  | <b>28b</b>  |   | /              | /               | 20.88 ± 1.82                             | 47.45           |
| 9 <sup>c</sup>  | <b>28c</b>  |  | /              | /               | 11.25 ± 0.15                             | 32.14           |
| 10 <sup>c</sup> | <b>28d</b>  |  | /              | /               | 9.02 ± 0.27                              | 13.67           |
| 11 <sup>c</sup> | <b>28e</b>  |  | /              | /               | 8.08 ± 0.22                              | 7.35            |
| 12 <sup>c</sup> | <b>28f</b>  |  | 4-OH           | /               | 13.59 ± 0.35                             | 14.61           |
| 13              | <b>29a</b>  |  | 4-OH           | CF <sub>3</sub> | 20.73 ± 0.88                             | 24.69           |
| 14              | <b>29b</b>  |  | 4-OH           | CF <sub>3</sub> | 19.21 ± 3.89                             | 53.36           |
| 15              | <b>29c</b>  |  | 4-OH           | CF <sub>3</sub> | 8.16 ± 0.15                              | 145.71          |
| 16 <sup>d</sup> | <b>29c'</b> |  | 4-OH           | CF <sub>3</sub> | 38.97 ± 2.27                             | 41.02           |
| 17              | <b>29d</b>  |  | 4-Me           | CF <sub>3</sub> | 23.41 ± 1.89                             | 31.21           |
| 18              | <b>29e</b>  |  | H              | CF <sub>3</sub> | >50                                      | >75.75          |
| 19              | <b>29f</b>  |  | 4-OMe          | CF <sub>3</sub> | 5.16 ± 0.15                              | 54.89           |

|                 |              |                                                                                   |                                                                                   |                 |              |        |
|-----------------|--------------|-----------------------------------------------------------------------------------|-----------------------------------------------------------------------------------|-----------------|--------------|--------|
| 20              | <b>29g</b>   |  | 4-F                                                                               | CF <sub>3</sub> | >50          | >78.12 |
| 21              | <b>29h</b>   |  | 3-OH                                                                              | CF <sub>3</sub> | 17.99 ± 1.48 | 18.36  |
| 22              | <b>29i</b>   |  | 4-OH                                                                              | CH <sub>3</sub> | 8.72 ± 0.45  | 122.82 |
| 23              | <b>29j</b>   |  | 4-<br>OMe                                                                         | CH <sub>3</sub> | 20.11 ± 1.06 | 69.34  |
| 24              | <b>29k</b>   |  | 4-OH                                                                              | CF <sub>3</sub> | 21.16 ± 0.89 | 19.96  |
| 25              | <b>29l</b>   | NH <sub>2</sub>                                                                   | 4-OH                                                                              | CF <sub>3</sub> | 32.32 ± 0.66 | 10.20  |
| 26              | <b>29m</b>   | OH                                                                                |  | CF <sub>3</sub> | 29.20 ± 1.70 | 182.50 |
| 27 <sup>d</sup> | <b>6a</b>    |                                                                                   |                                                                                   |                 | 21.38 ± 1.29 | 85.52  |
| 28              | <b>4-OHT</b> |                                                                                   |                                                                                   |                 | 21.50 ± 2.74 | 32.09  |
| 29              | <b>Ful</b>   |                                                                                   |                                                                                   |                 | >50          | >357.1 |

<sup>a</sup>The data are expressed as mean ± SD of at least three independent determinations; <sup>b</sup>TI is therapeutic index, TI = IC<sub>50</sub><sup>MCF-10A</sup> / IC<sub>50</sub><sup>MCF-7</sup>. <sup>c</sup>Series II compounds were mixtures of regioisomers. <sup>d</sup>Compound **29c'** was regioisomer of **29c**. <sup>d</sup>**6a** was a derivative of OBHSA, X = NCH<sub>2</sub>CF<sub>3</sub>, R = 4-OH.



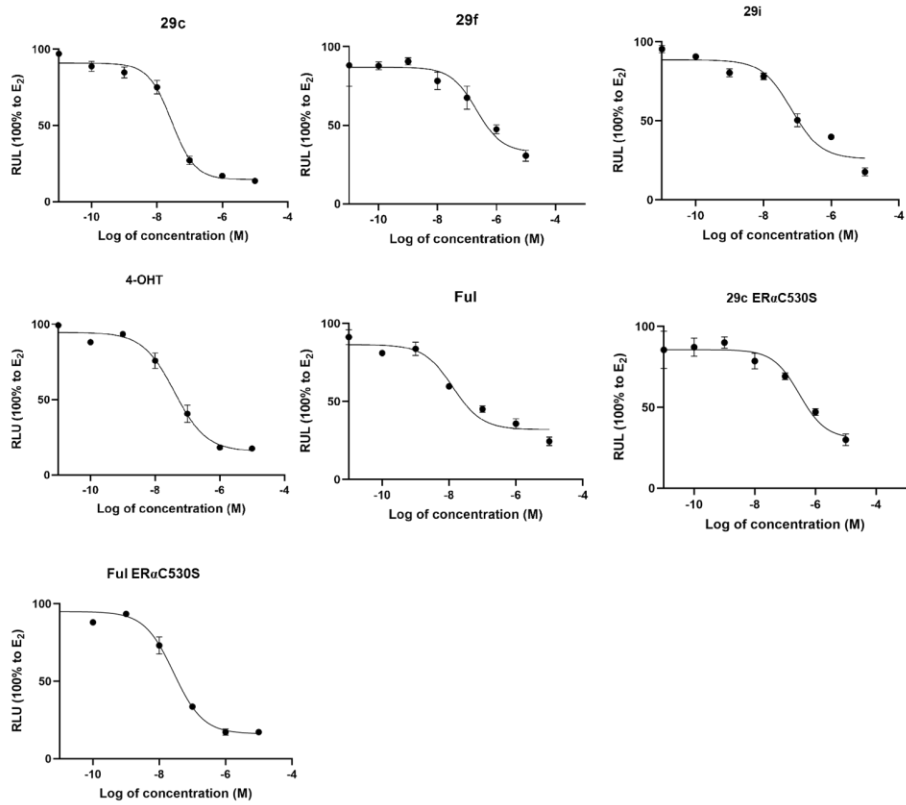

**Figure S2.** The transcriptional curves of selected compounds for ER $\alpha$  Antagonist activity.

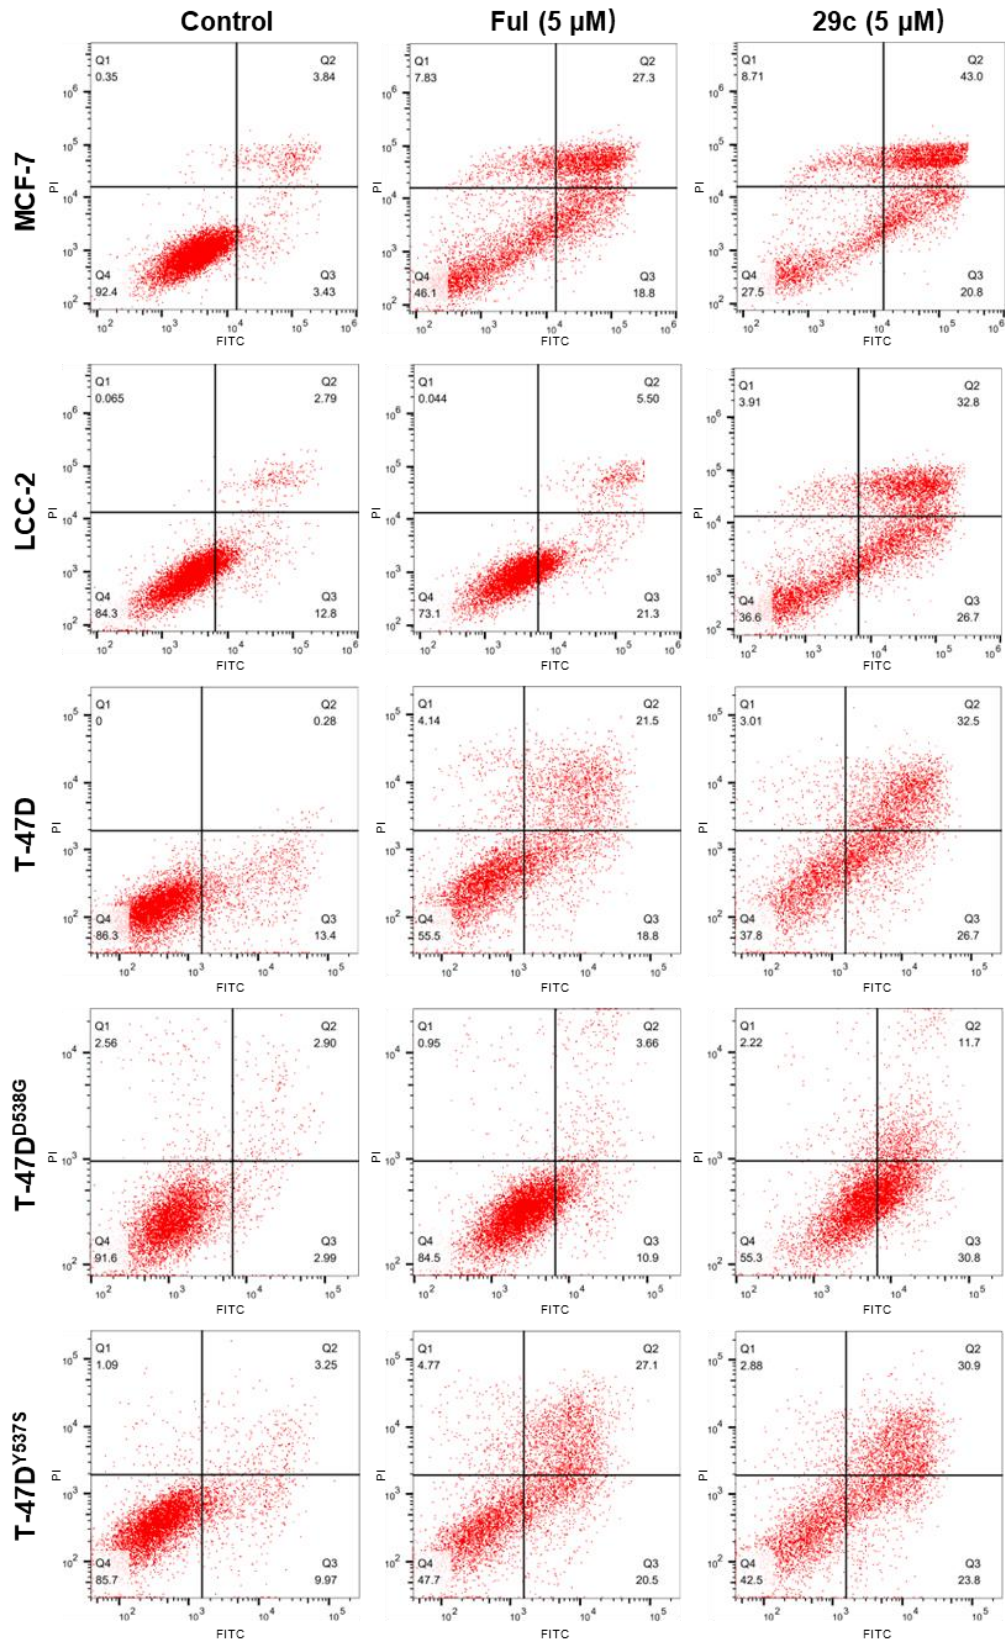

**Figure S3.** Cell lines (MCF-7, LCC-2, T-47D, T-47D<sup>Y537S</sup>, T-47D<sup>D538G</sup>) undergoing apoptosis were detected by flow cytometry. Cells were treated with or without 5 μM **29c** in multi-well X6 culture plates for 48 h, and 5 μM fulvestrant served as positive control.

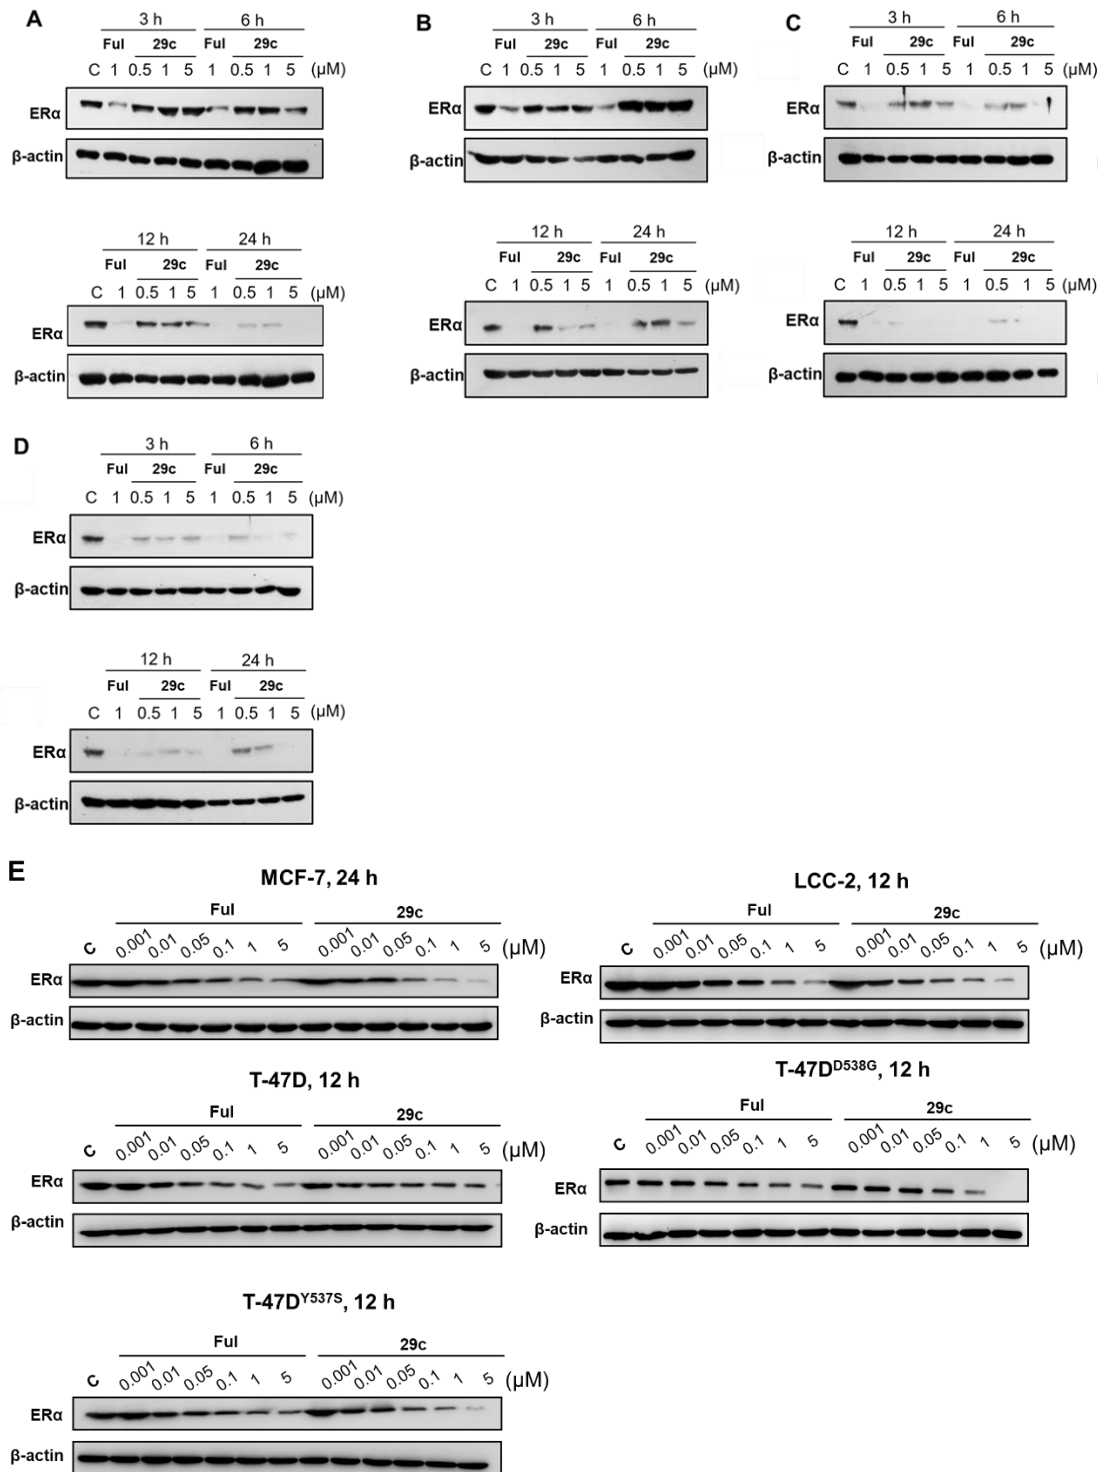

**Figure S4.** (A) Immunoblot analysis of ER $\alpha$  protein treated with **29c** at 0.5, 1, and 5  $\mu$ M and time course of ER $\alpha$  degradation in (A) MCF-7 cells, (B) LCC-2 cells, (C) T-47D<sup>D538G</sup> cells and (D) T-47D<sup>Y537S</sup> cells. (D) Immunoblot analysis of ER $\alpha$  protein treated with gradient concentrations Ful or **29c** in the indicated BC cell lines. DC<sub>50</sub> and D<sub>max</sub> values were quantified from two independent experiments. All Immunoblot was treated with  $\beta$ -actin as the loading control.

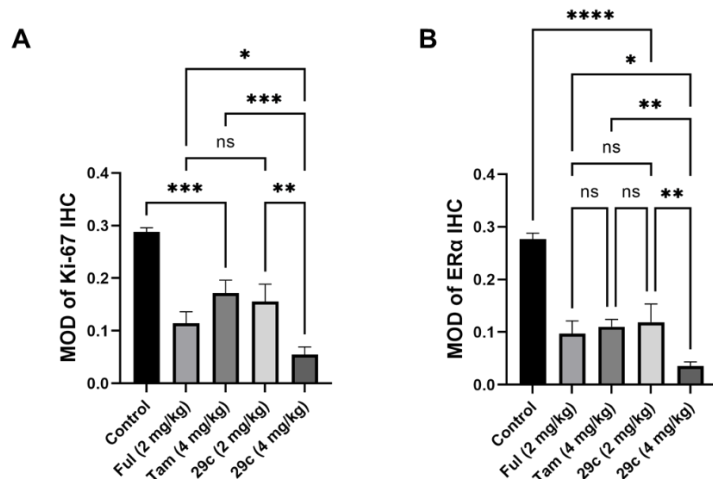

**Figure S5.** Statistical IHC analysis of Ki-67 and ER $\alpha$  in dissected tumor tissues of each treatment group. \*\*\*\* $P$  value <0.0001, \*\*\* $P$  value <0.001, \*\* $P$  value <0.01 and \* $P$  value <0.05. ns = not statistically significant.

### PART III. LC/MS analysis of mutant ER and compound 29c covalent profile

**A**

ER $\alpha$  mutant Y537S:  
 ERMKCKNVVPLSDLLLEMLDA  
 ER $\alpha$  mutant Y537S C381S C417S :  
 LTLHDQVHLLLESAWLEILMI  
 DRNQGKSVVEGMVEIFDMLLA  
 YSMKCKNVVPLSDLLLEMLD

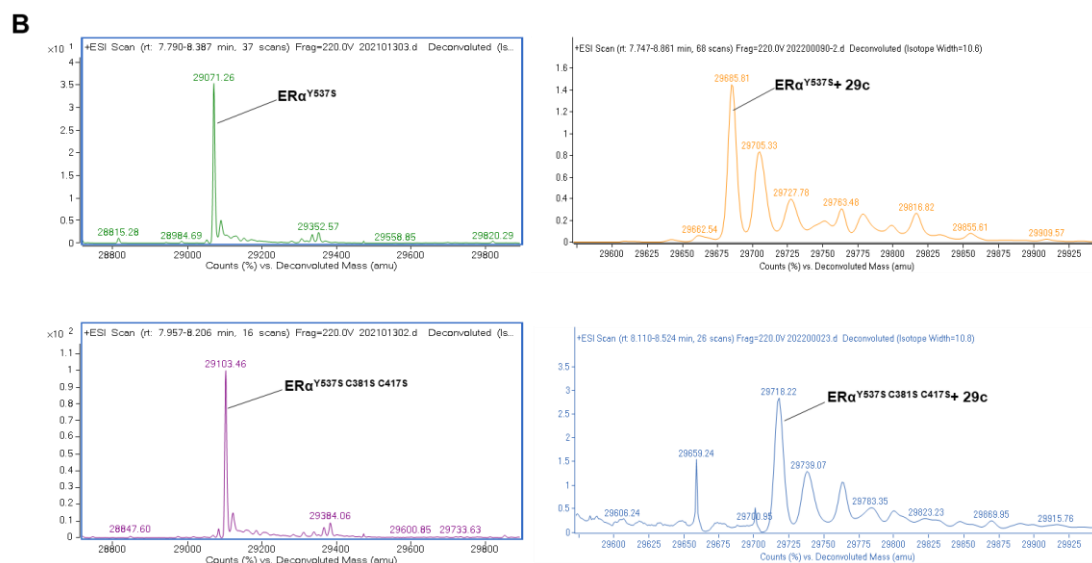

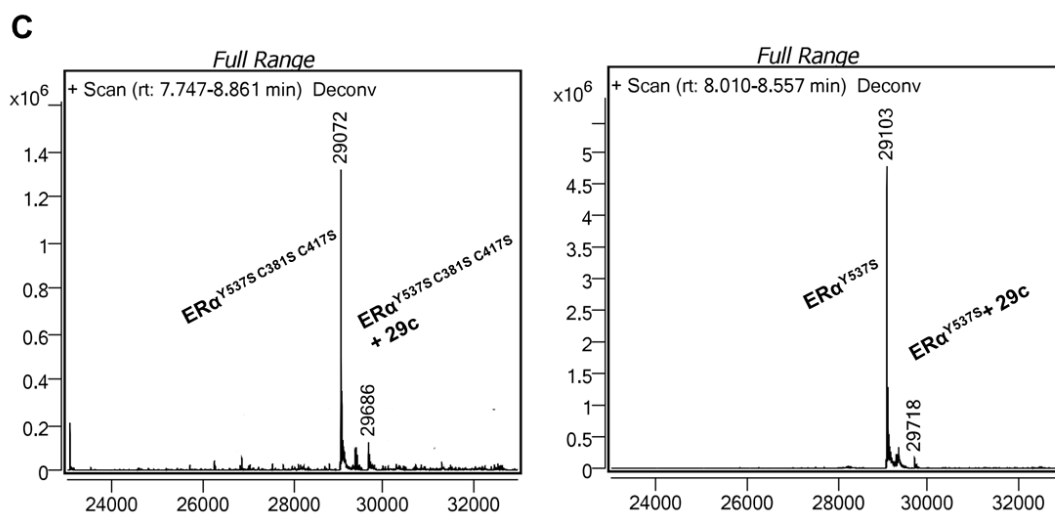

**Figure S6.** (A) ER $\alpha$  mutant sequence alignment highlighting position (shown in red) and (B, C) LC-MS analysis of **29c** covalent targeting ER $\alpha$ <sup>Y537S</sup> and ER $\alpha$ <sup>Y537S C381S C417S</sup>.

## PART IV. ER $\alpha$ protein purification and crystallography

### Protein Expression and Purification

Escherichia coli codon-optimized genes encoding the LBDs of the receptors, His-TEV-ER $\alpha$ -Y537S (305-554), and His-TEV-ER $\alpha$  C381S-C417S-Y537S (305-554) were synthesized and cloned into pET46 EK/LIC (Genecreate). Proteins were expressed in BL21 (DE3) Escherichia coli overnight at 16 °C after induction with 0.2 mM IPTG at an OD600 of ~0.8. Soluble protein was purified by immobilized metal affinity chromatography using a Ni<sup>2+</sup> column twice followed by dialysis. For mass spectrometry and crystallography, the His-tag was removed by TEV protease digest.<sup>45</sup>

Protein sequences of ER $\alpha$  LBD Y537S (305-554)

SLALSLTADQMVSALLDAEPPILYSEYDPTRPFSEASMMGLLTNLADRELVHMI  
 NWAKRVPGFVDLTLHDQVHLLCAWLEILMIGLVWRSMEHPGKLLFAPNLLL  
 DRNQGKCVEGMVEIFDMLLATSSRFRMMNLQGEEFVCLKSIILLNSGVYTFLS  
 STLKSLEEKDHIHRVLDKITDTLIHLMAKAGLTLQQHQRLAQLLLILSHIRHM  
 SNKGMEHLYSMKCKNVVPLSDLLLEMLDAHRLHAPTS

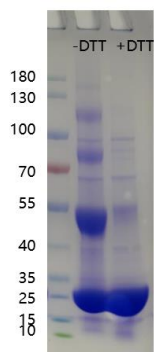

Protein sequences of ER $\alpha$  LBD Y537S C381S C417S (305-554)

SLALSLTADQMVSALLDAEPPILYSEYDPTRPFSEASMMGLLTNLADRELVHMI  
 NWAKRVPGFVDLTLHDQVHLLSAWLEILMIGLVWRSMEHPGKLLFAPNLLL  
 DRNQGKSVEGMVEIFDMLLATSSRFRMMNLQGEEFVCLKSILLNSGVYTFLS  
 STLKSLEEKDHIHRVLDKITDTLIHLMAKAGLTLQQHQRLAQLLLILSHIRHM  
 SNKGMEHLYSMKCKNVVPLSDLLEMLDAHRLHAPTS

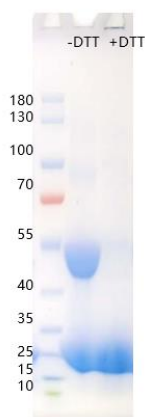

### Macromolecular X-ray Crystallography

The ER $\alpha$  C381S-C417S-Y537S LBD was co-crystallized with compound **29c** through sitting drop vapor diffusion method using trial gradients of 16 to 18% (weight/ volume) PEG 3350, 0.25 M Ammonium sulfate, and 0.1 M HEPES pH 7.5. The X-ray diffraction datasets were collected on the in-house Bruker D8 Venture coupled with a CMOS-PHOTON II detector in Hubei university. Proteum 3 (Bruker AXS GmbH) was used to process the X-ray diffraction datasets. The structures were solved by molecular replacement of the starting model, Protein Data Bank (PDB) entry 5DI7, and then rebuilt and refined using the Refmac5<sup>1</sup> and COOT<sup>2</sup>. Prior to structure refinement, 5%

randomly selected reflections were set aside for calculating  $R_{\text{free}}$  as a monitor of model quality. All graphics for the protein structures were prepared by using the PyMOL program (<http://pymol.sourceforge.net/>). The PDB identification code for ER complex with compound **29c** is 7YMK.

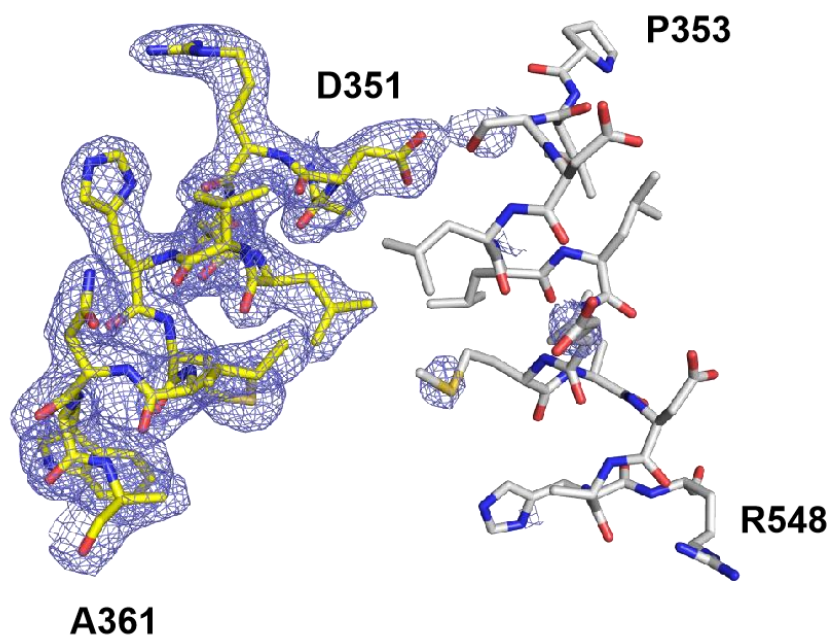

**Figure S7.** Structure of the ER LBD with **29c** shows that H12 could not be modeled in two of four subunits due to poor electron density. The A chain of H3 (yellow) is shown with the B chain superimposed (gray) to show the expected location of H12, which was not modeled. The 2Fo-Fc electron density map is contoured at  $1.0 \sigma$ .

**Table S2.** Data collection and refinement statistics for crystal structures

|                                   | ER $\alpha$ LBD C381S C417S |
|-----------------------------------|-----------------------------|
|                                   | Y537S / <b>29c</b>          |
| PDB code                          | 7YMK                        |
| <b>Data collection</b>            |                             |
| Wavelength                        | 1.34138                     |
| Space group                       | C222 <sub>1</sub>           |
| Unit cell                         |                             |
| a, b, c (Å)                       | 52.4, 101.4, 195.8          |
| $\alpha$ , $\beta$ , $\gamma$ (°) | 90, 90, 90                  |

|                                                |                           |
|------------------------------------------------|---------------------------|
| Resolution (Å) <sup>a</sup>                    | 33.76-2.25<br>(2.28-2.25) |
| No. of observed reflections                    | 25394 (1020)              |
| Redundancy                                     | 10.1 (6.4)                |
| Completeness (%)                               | 99.8 (98.7)               |
| Average $I/\sigma(I)$                          | 12.2 (2.2)                |
| $R_{\text{merge}}$ (%) <sup>b</sup>            | 8.7 (51.0)                |
| <b>Refinement<sup>c</sup></b>                  |                           |
| $R_{\text{work}}$ (%)                          | 19.4                      |
| $R_{\text{free}}$ (%)                          | 25.3                      |
| r.m.s.d. bonds (Å) <sup>d</sup>                | 0.009                     |
| r.m.s.d. angles (°)                            | 1.58                      |
| <b>Ramachandran statistics<sup>e</sup></b>     |                           |
| Most favored (%)                               | 98.7                      |
| Allowed (%)                                    | 1.3                       |
| Outliers (%)                                   | 0                         |
| <b>Average B-factor (Å<sup>2</sup>) /atoms</b> |                           |
| Protein                                        | 47.7/3757                 |
| Water                                          | 44.0/153                  |
| Ligand                                         | 60.9/55                   |

---

<sup>a</sup> Values in parentheses are for the highest resolution shell.

<sup>b</sup>  $R_{\text{merge}} = \frac{\sum_{hkl} \sum_i |I_i(hkl) - \langle I(hkl) \rangle|}{\sum_{hkl} \sum_i I_i(hkl)}$ , in which the sum is over all the  $i$  measured reflections with equivalent miller indices  $hkl$ ;  $\langle I(hkl) \rangle$  is the averaged intensity of these  $i$  reflections, and the grand sum is over all measured reflections in the data set.

<sup>c</sup> All positive reflections were used in the refinement.

<sup>d</sup> According to Engh and Huber <sup>3</sup>.

<sup>e</sup> Calculated by using MolProbity <sup>4</sup>.



## PART V. Proteomics experiments

Tandem Mass Tag (TMT)-based quantitative proteomic approach was applied to measure the protein fold changes after 12 hours of treatment with 5  $\mu\text{M}$  **29c** or DMSO in MCF-7 cells. A total of 2  $\mu\text{g}$  of simple peptides were separated and analyzed using a nano-UPLC (Thermo Fisher Scientific). The separation was achieved using a reversed-phase column (100  $\mu\text{m}$  ID  $\times$  15 cm, Reprosil-Pur 120 C18-AQ, 1.9  $\mu\text{m}$ , Dr. Maisch). Mobile phases consisted of H<sub>2</sub>O with 0.1% FA, 2% ACN (phase A) and 80% ACN, 0.1% FA (phase B). The sample separation was performed with a 90-minute gradient at a flow rate of 300 nL/min. Mass spectrometry files were analyzed using Proteome Discoverer software (Version 2.4.0.305) with the built-in Sequest HT search engine. The false discovery rate (FDR) was set to 0.01 for both peptide-spectrum matches (PSMs).

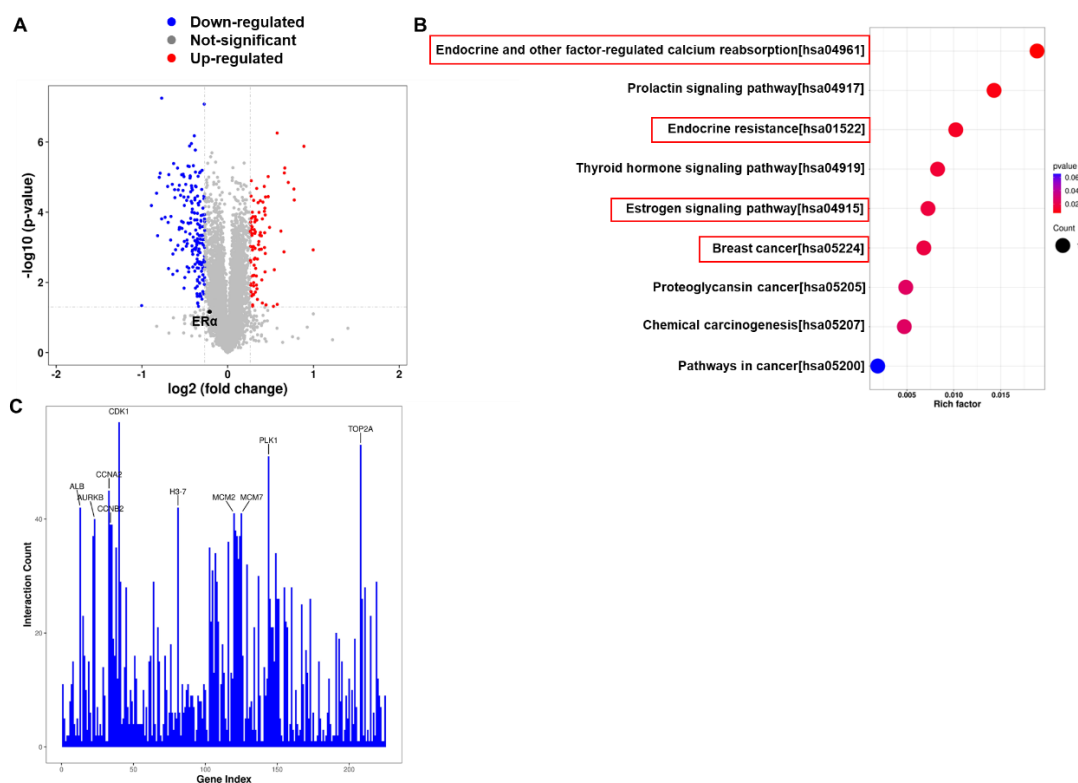

**Figure S8.** Tandem Mass Tag (TMT)-based quantitative proteomic approach was applied to measure the protein fold changes. (A) Proteomic analysis was performed to compare the protein level change between **29c** treated group and the control group. (B) Kyoto Encyclopedia of Genes and Genomes (KEGG) metabolic pathway enrichment analysis of differentially expressed proteins. The color of the circle indicates the size of the p-value, with deeper red shades being correlated with smaller p-values. (C) Significant regulation of protein-involved interactions.

## References

1. Emsley, P.; Cowtan, K. Coot: model-building tools for molecular graphics. *Acta Crystallogr D Biol Crystallogr* 2004;**60**:2126-2132.
2. Murshudov, G. N.; Vagin, A. A.; Dodson, E. J. Refinement of macromolecular structures by the maximum-likelihood method. *Acta Crystallogr D Biol Crystallogr* 1997;**53**:240-255.
3. Engh, R. A.; Huber, R. Accurate bond and angle parameters for X-ray protein structure refinement. *Acta Crystallogr. Section A*. 1991;**47**:392-400.
4. Chen, V. B.; Arendall, W. B., III; Headd, J. J.; Keedy, D. A.; Immormino, R. M.; Kapral, G. J.; Murray, L. W.; Richardson, J. S.; Richardson, D. C. MolProbity: all-atom structure validation for macromolecular crystallography. *Acta Crystallogr. Section D. Biol. Crystallogr.* 2010;**66**:12-21.

## PART VI. <sup>1</sup>H NMR and <sup>13</sup>C NMR spectra of final compounds

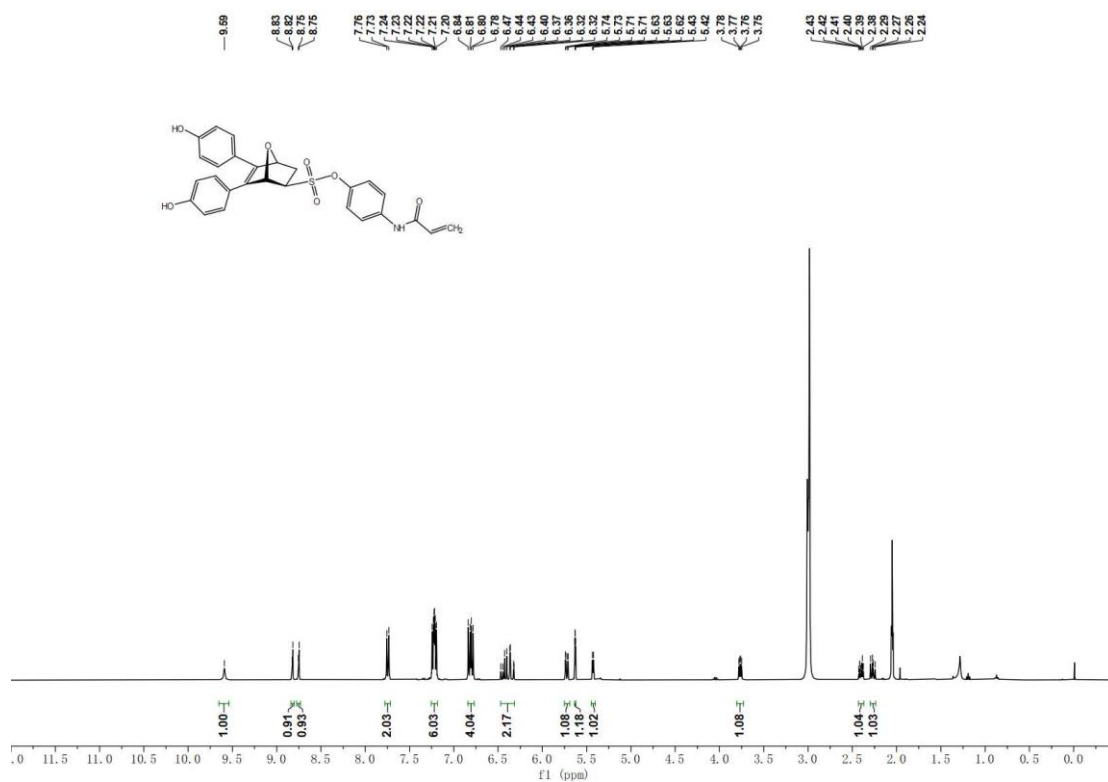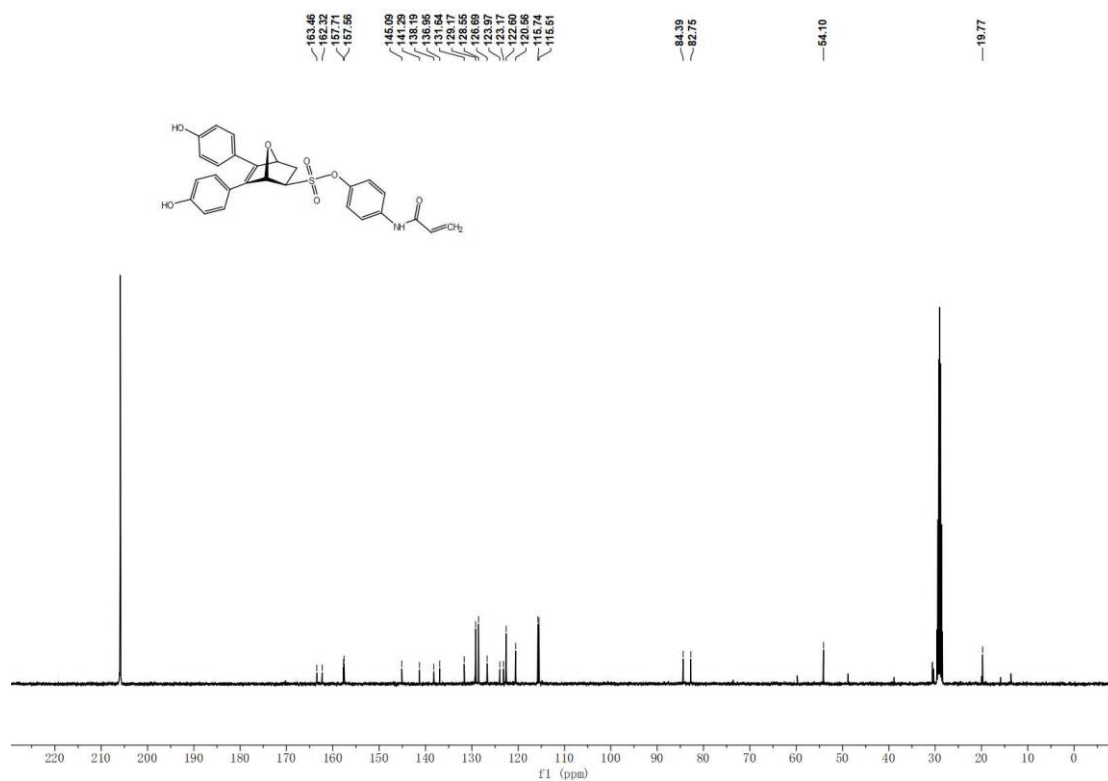

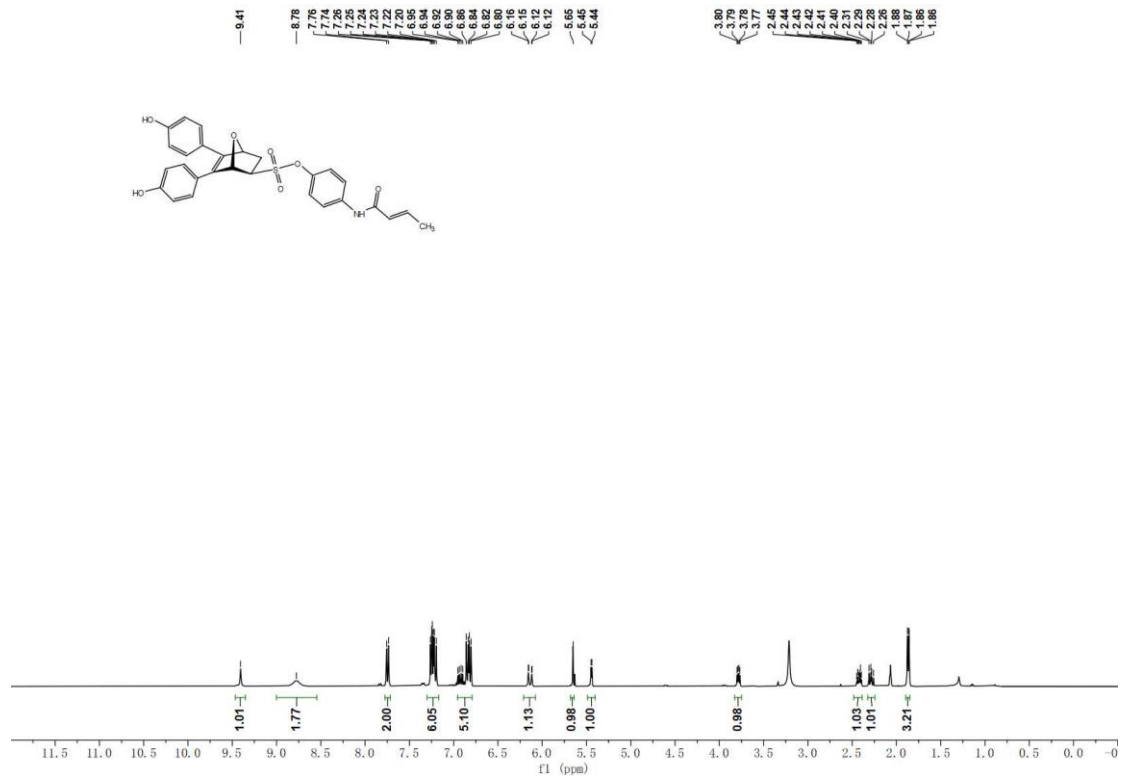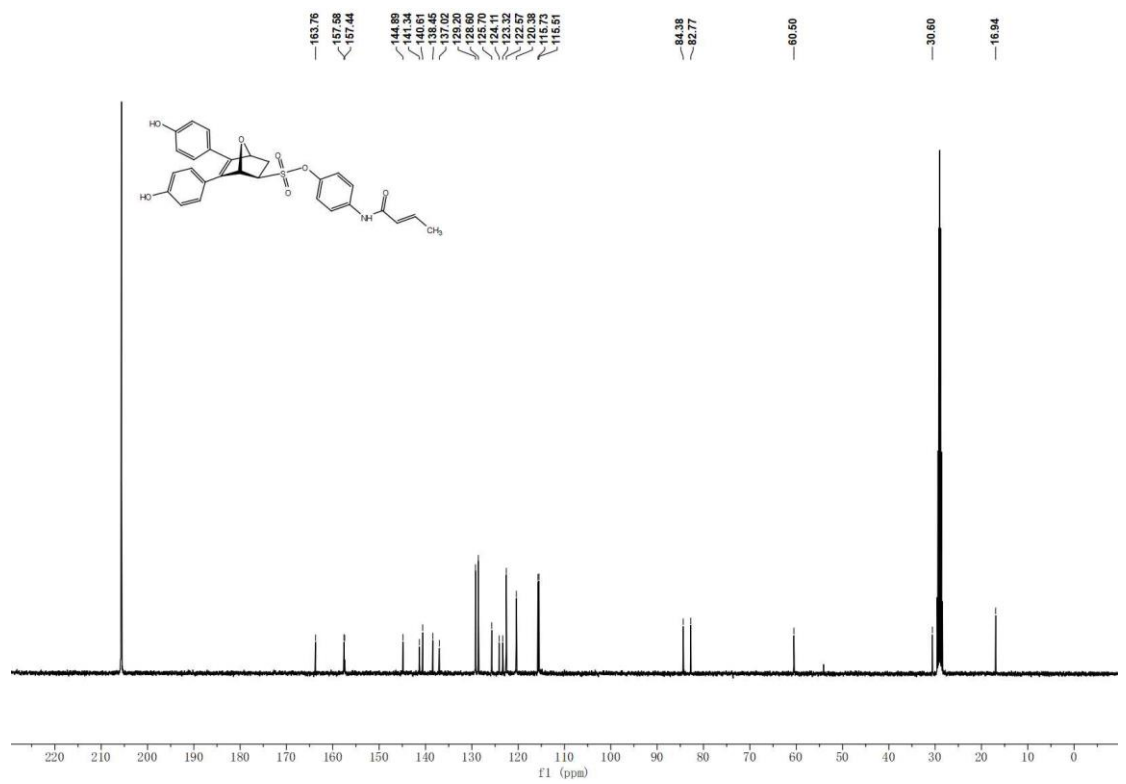

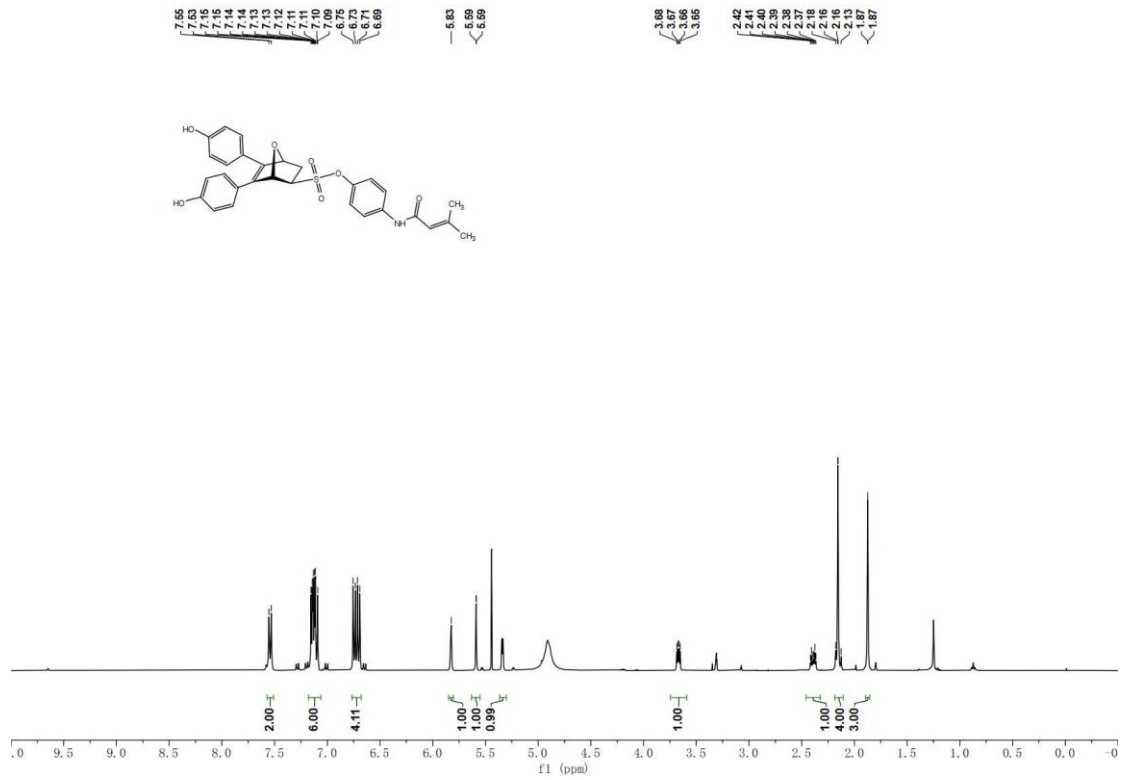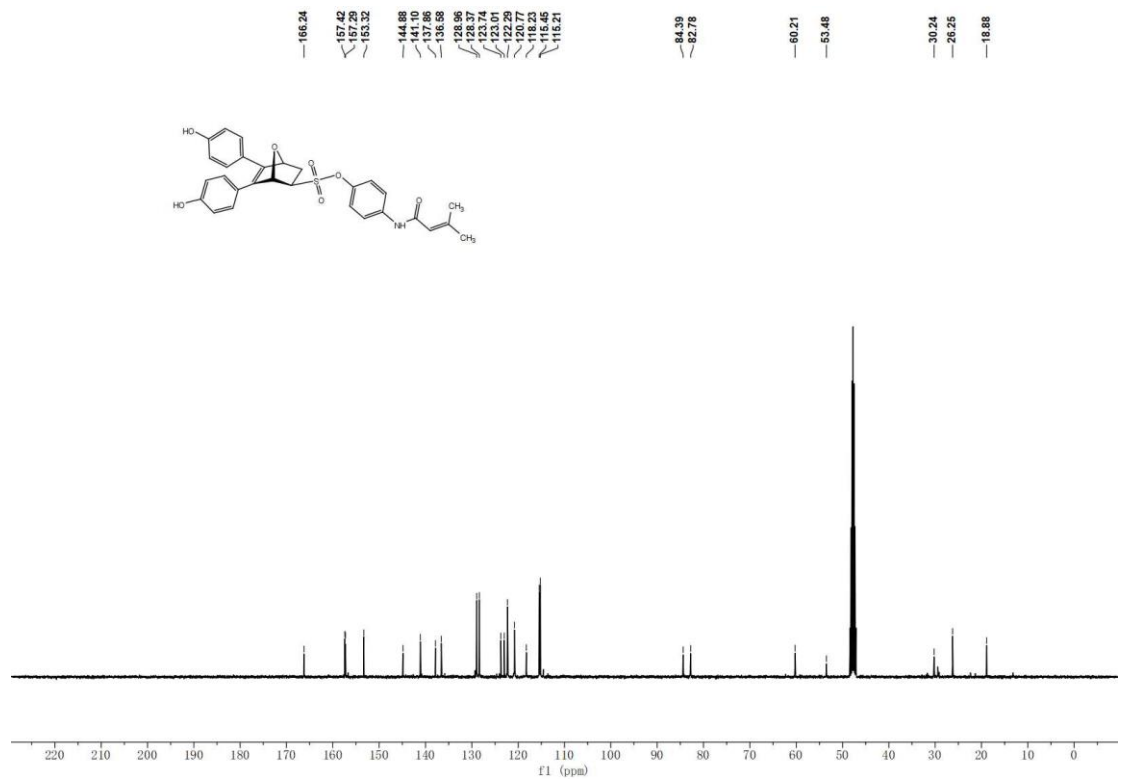

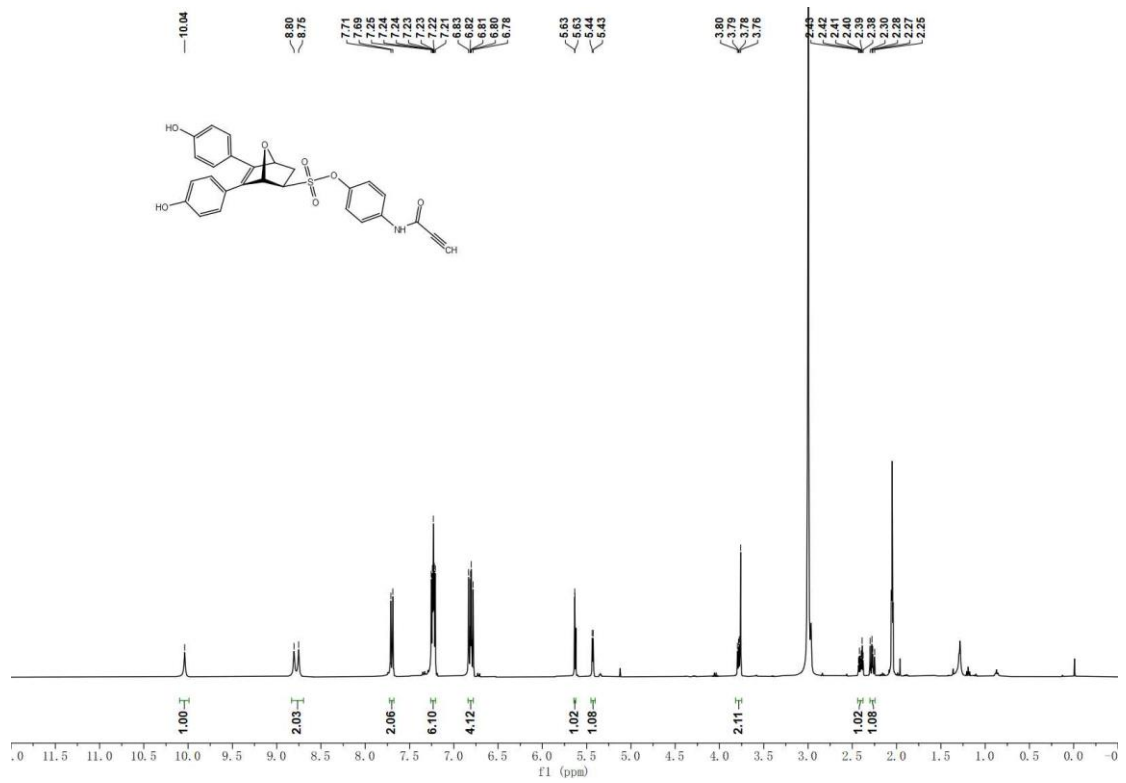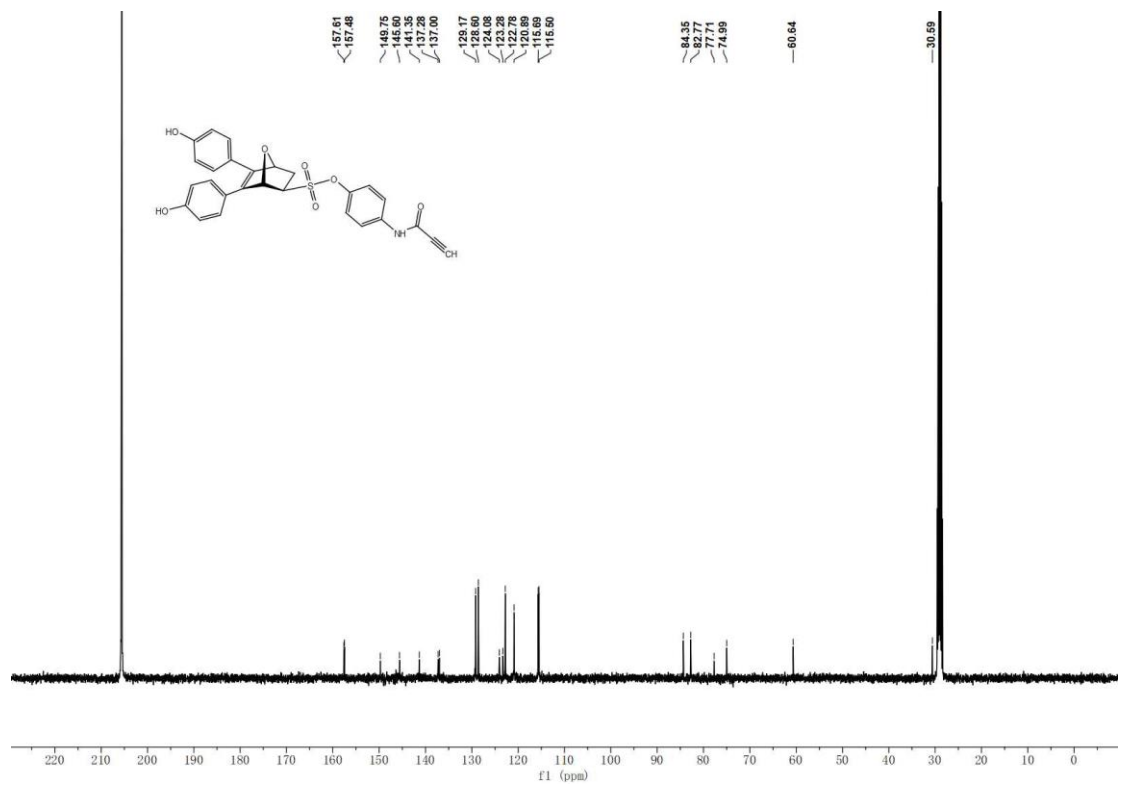

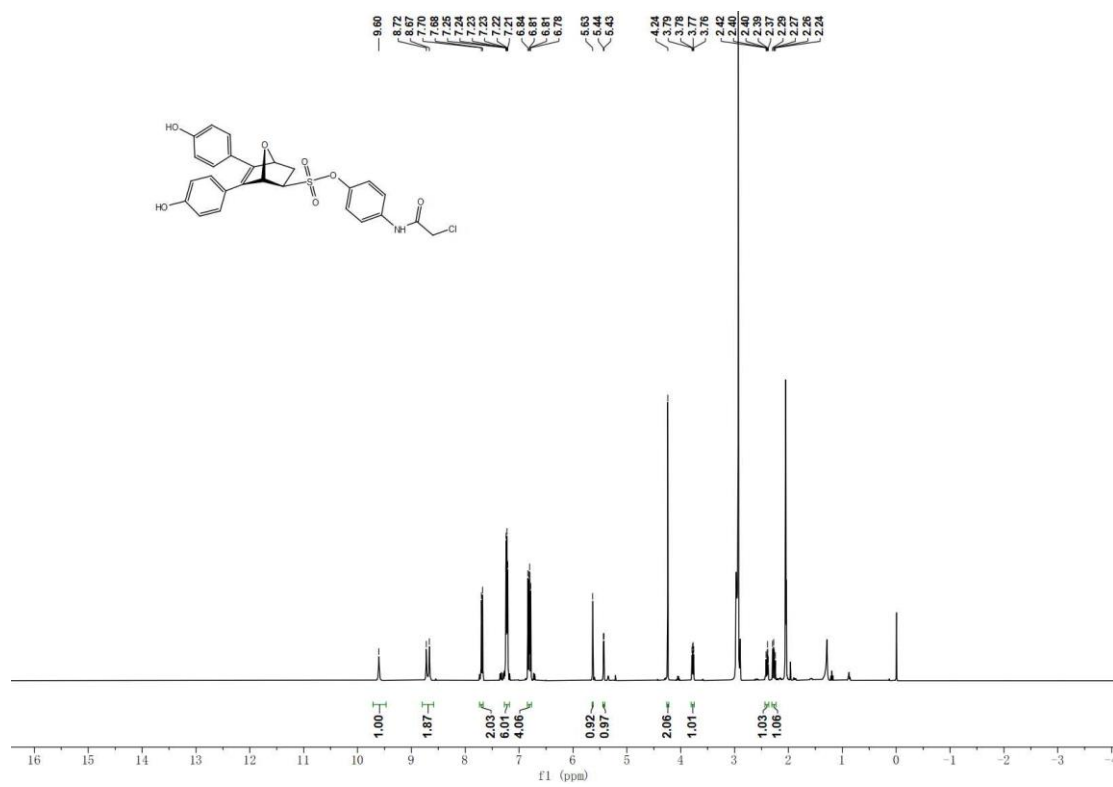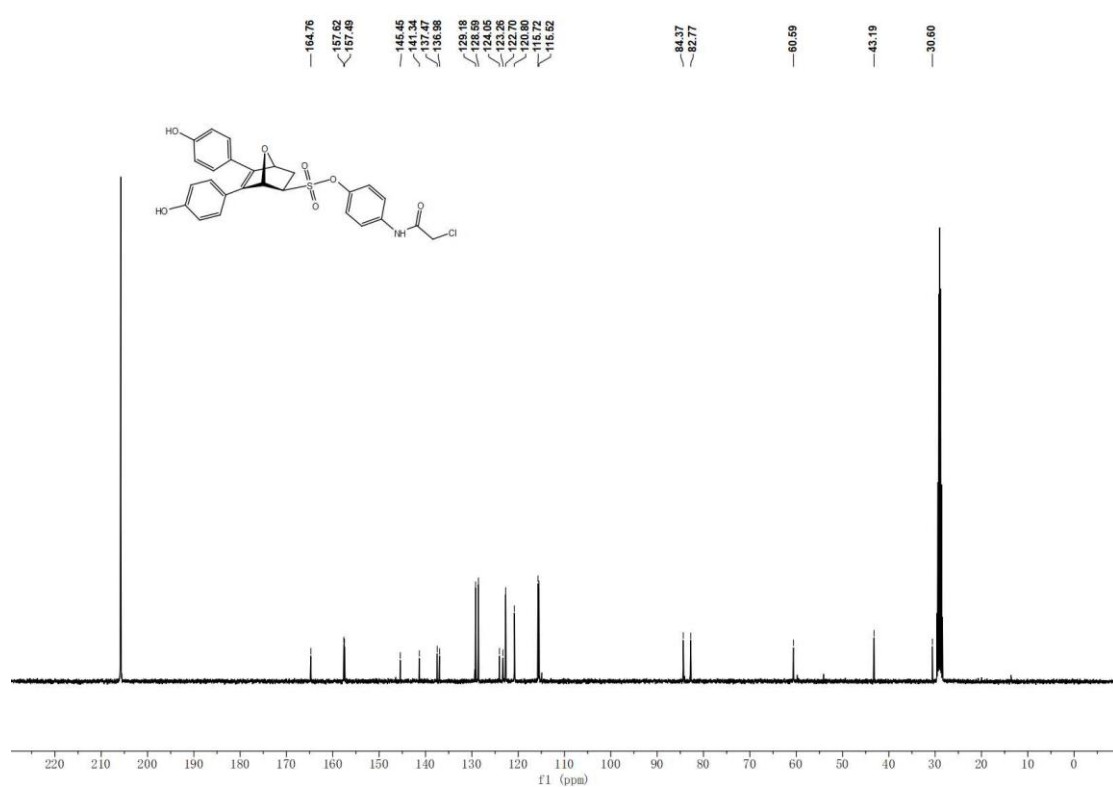

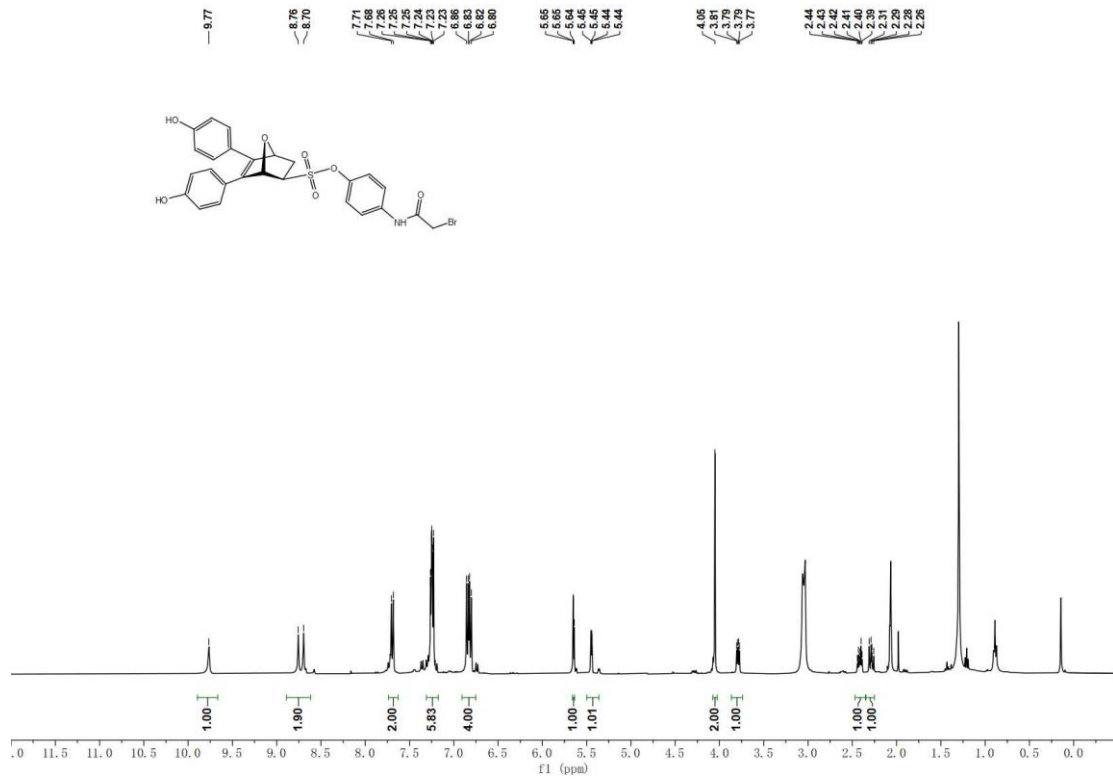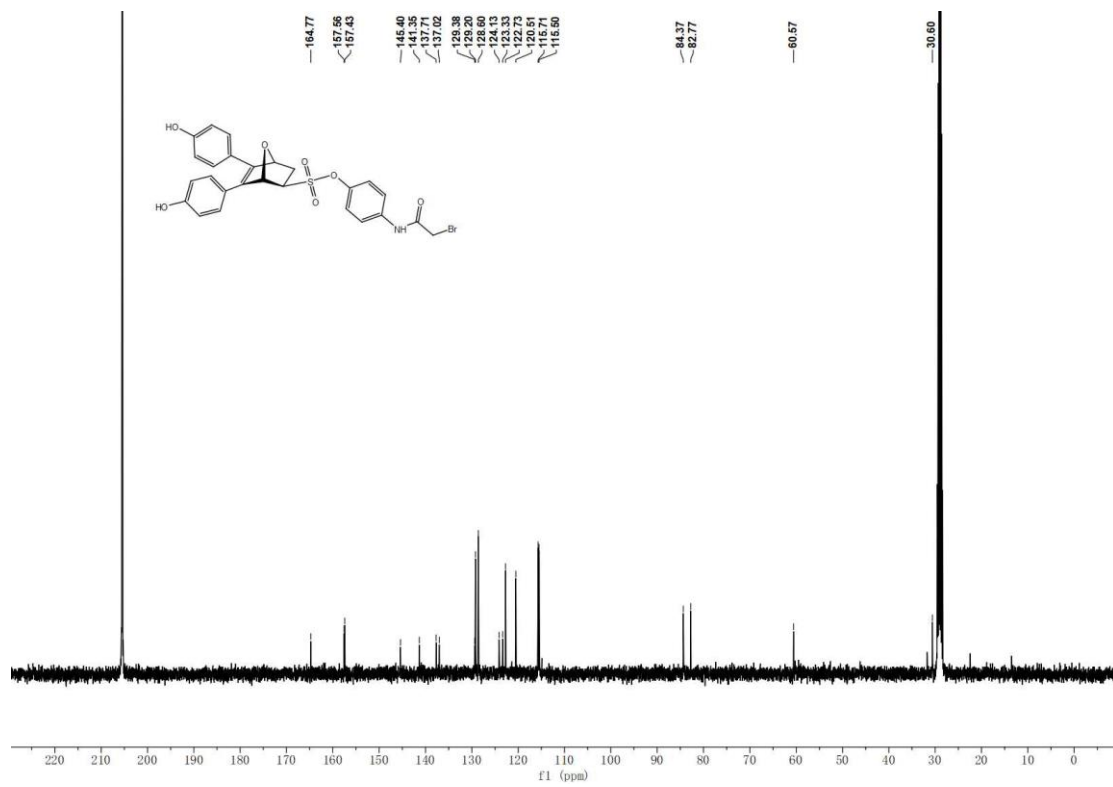



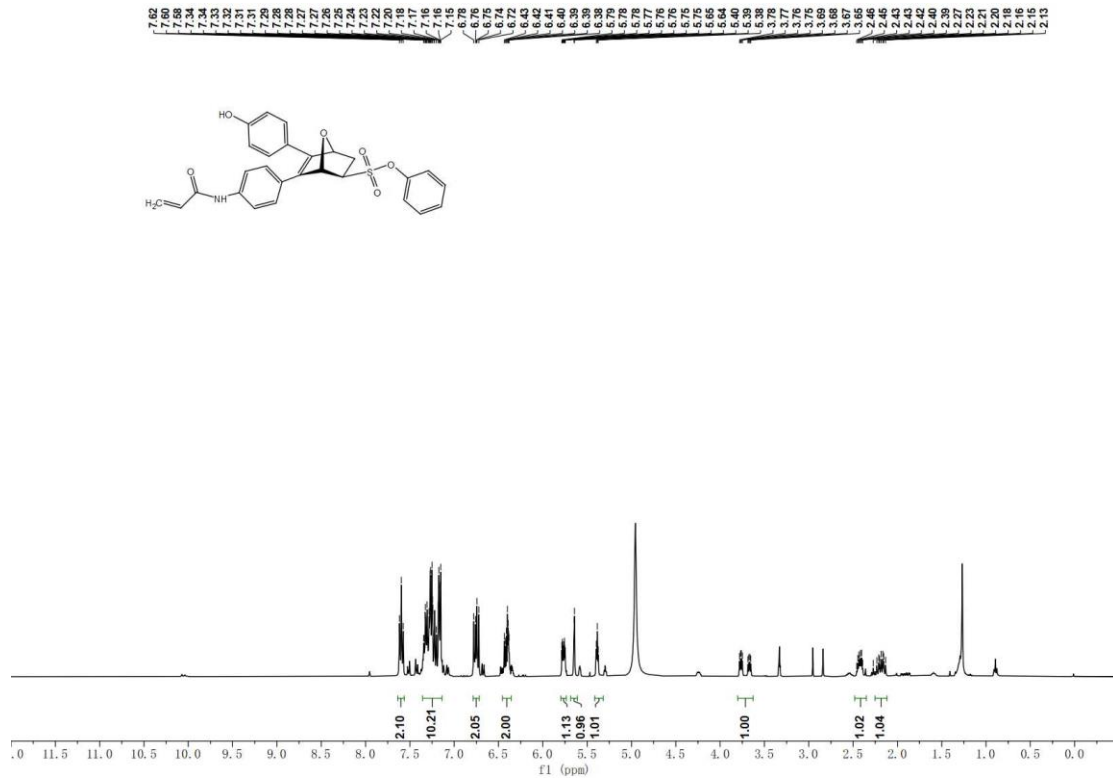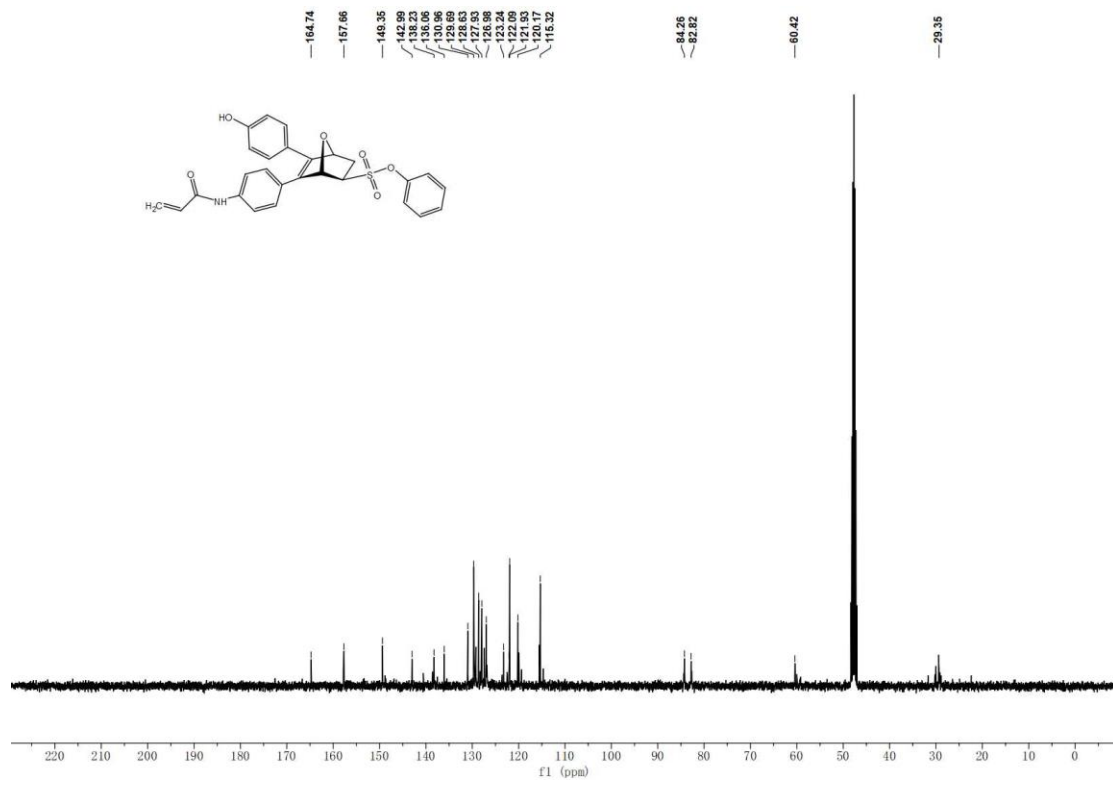

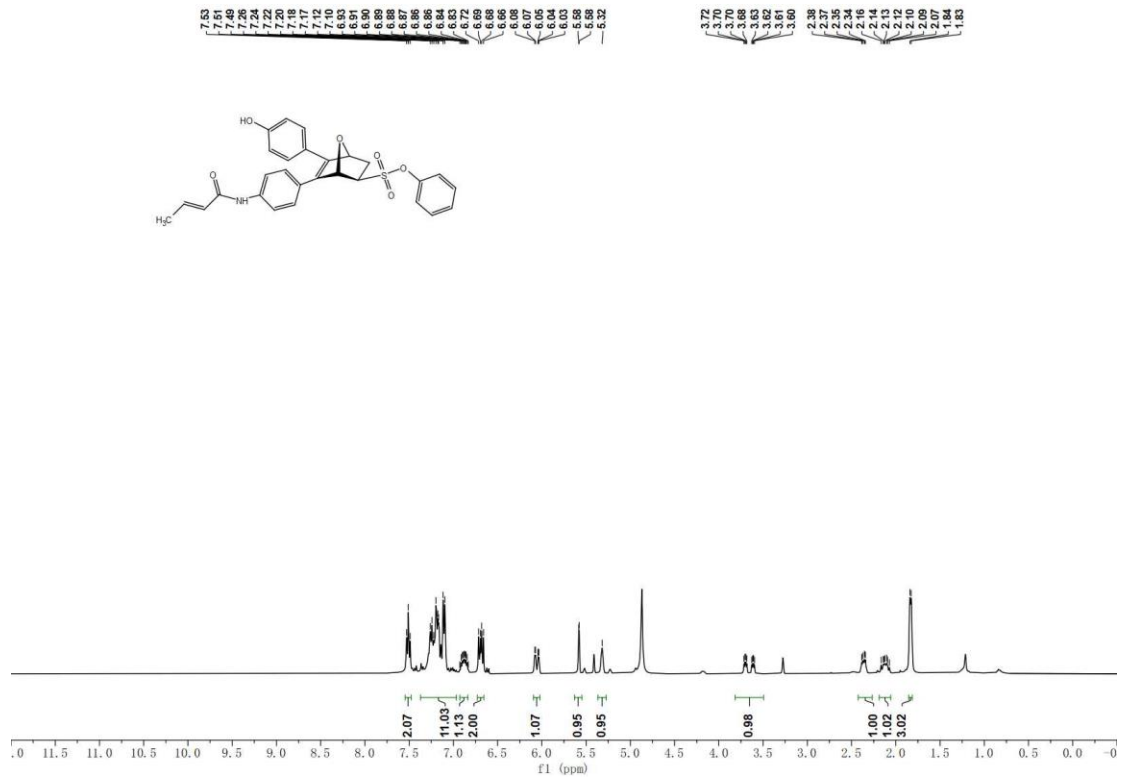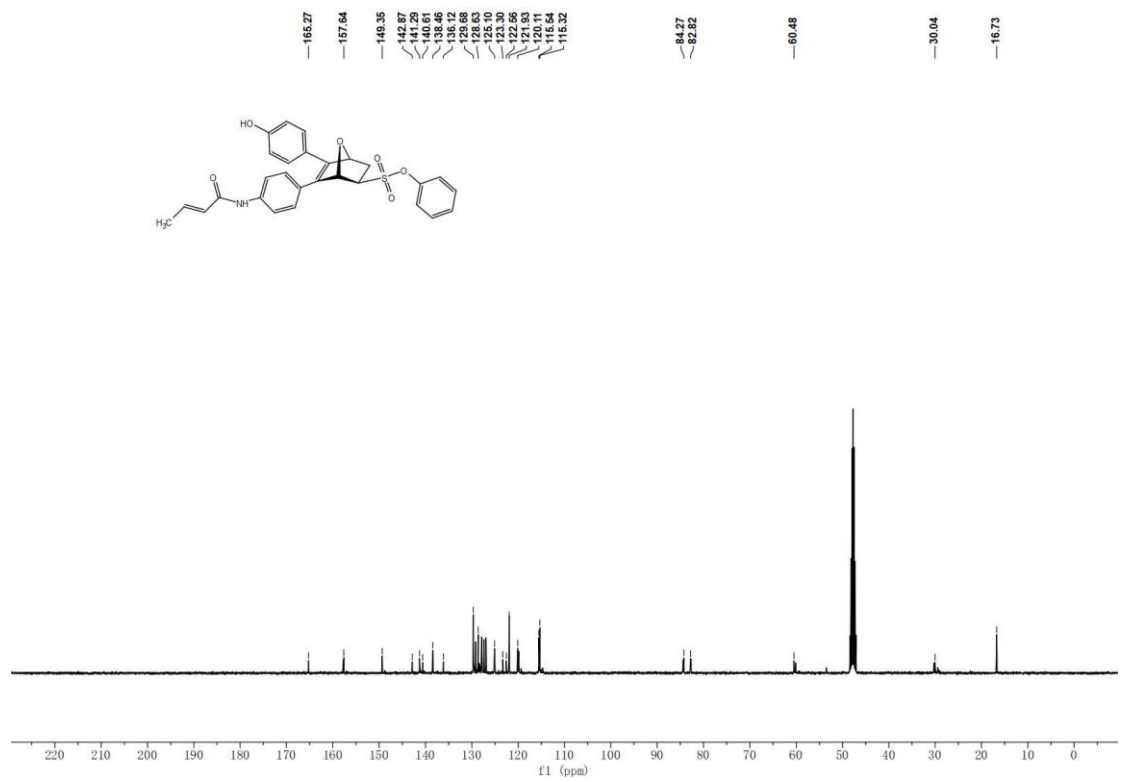

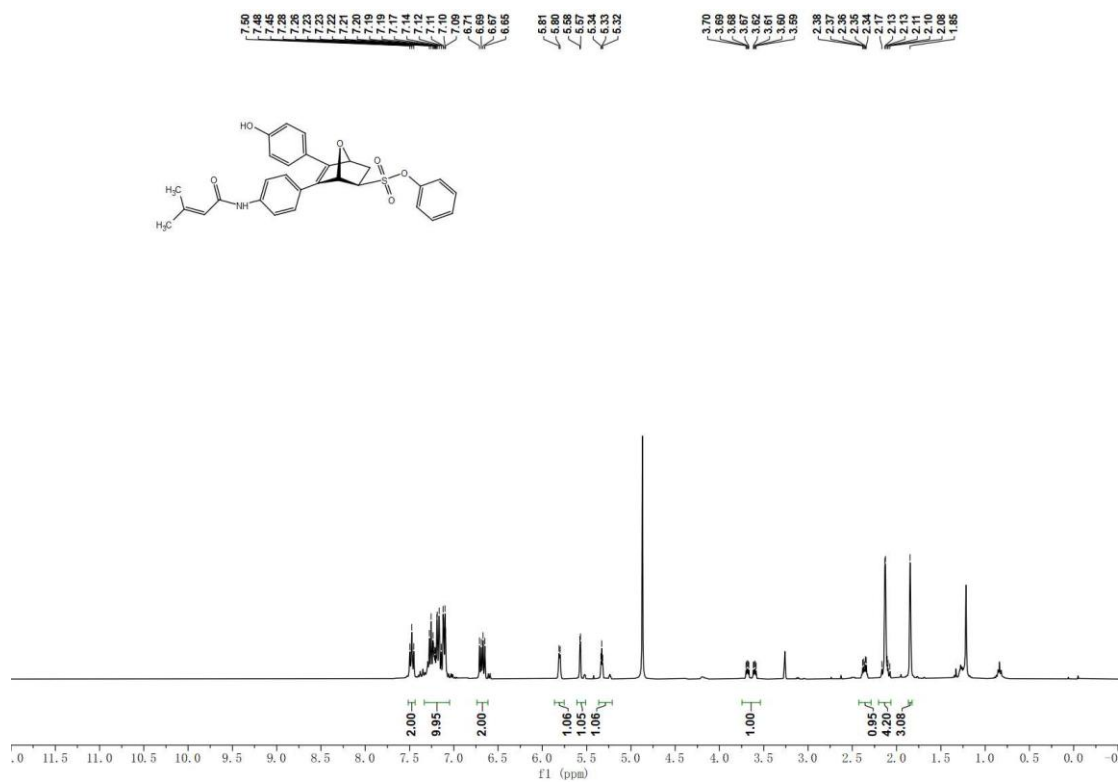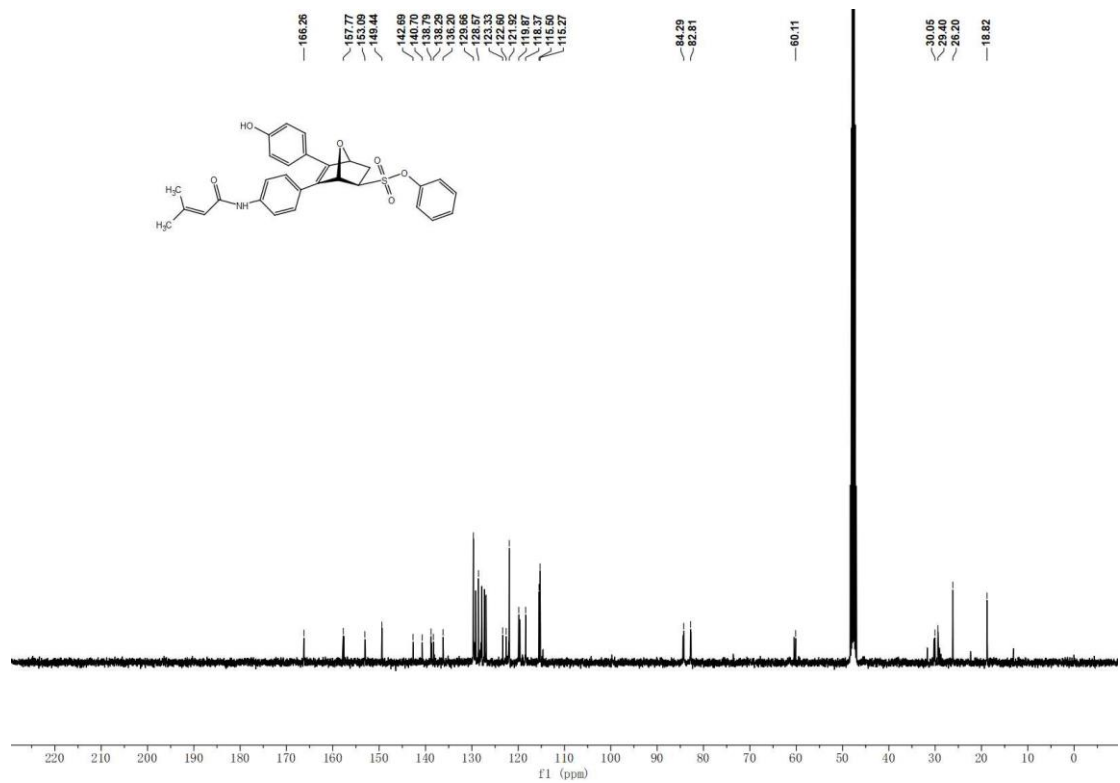

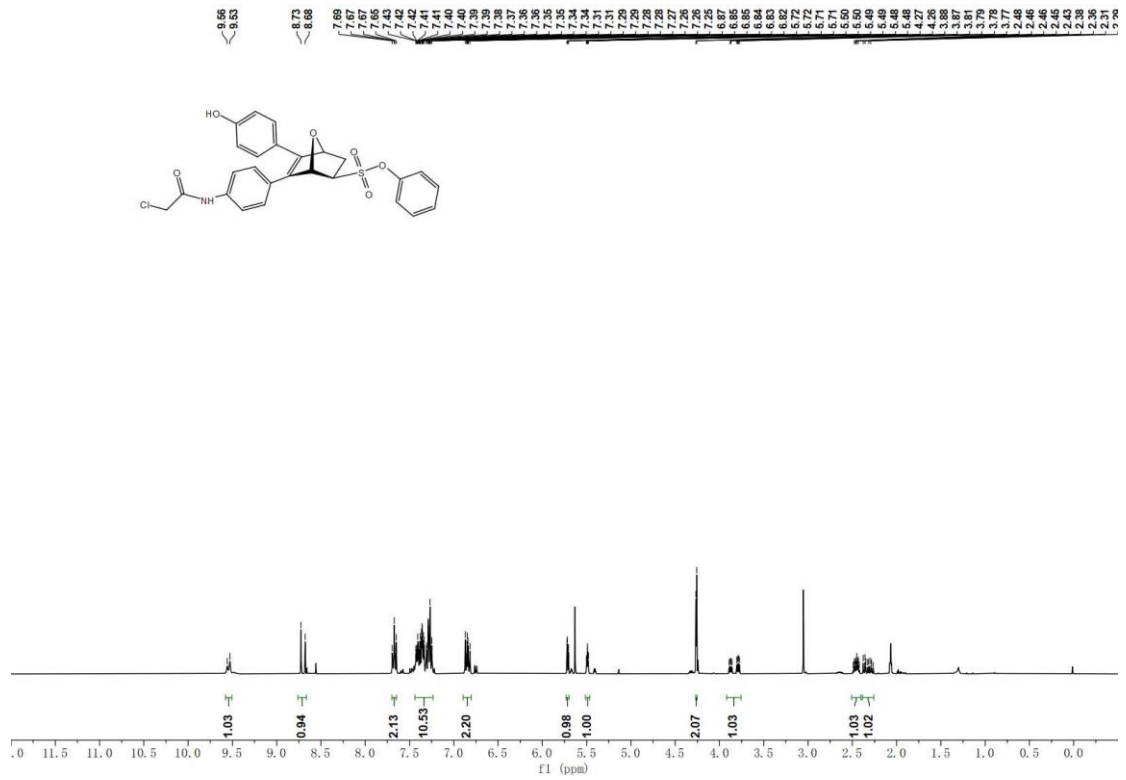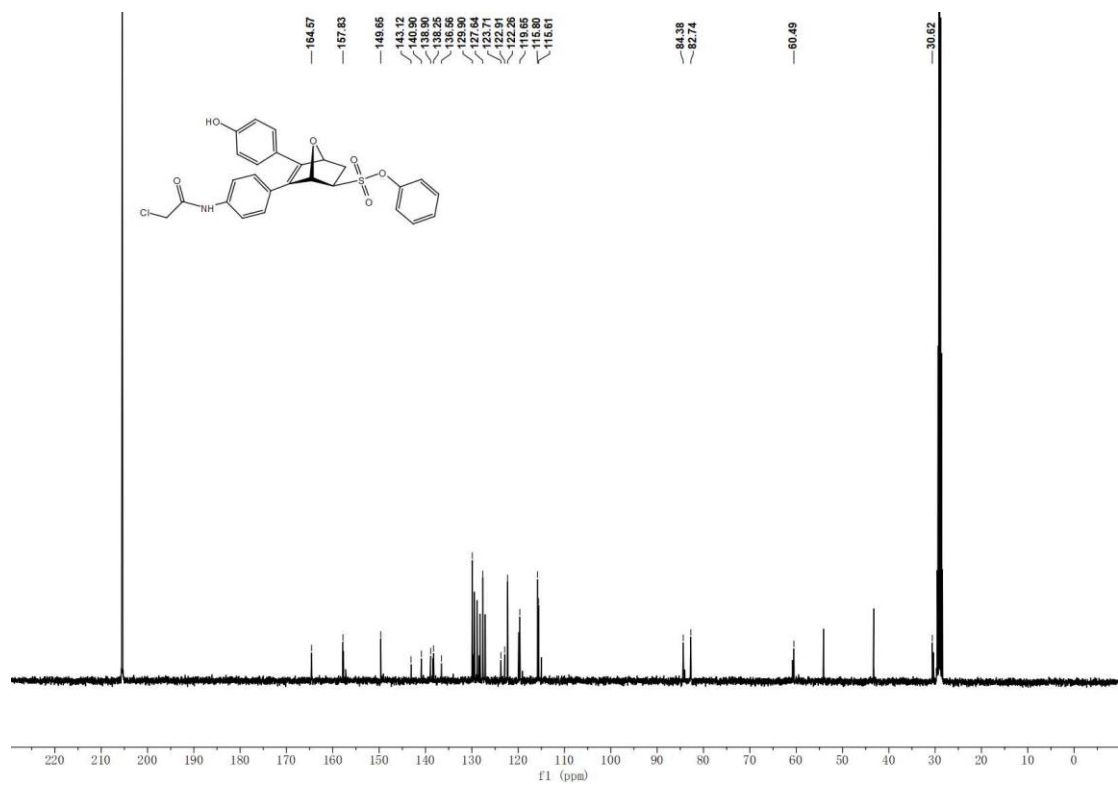

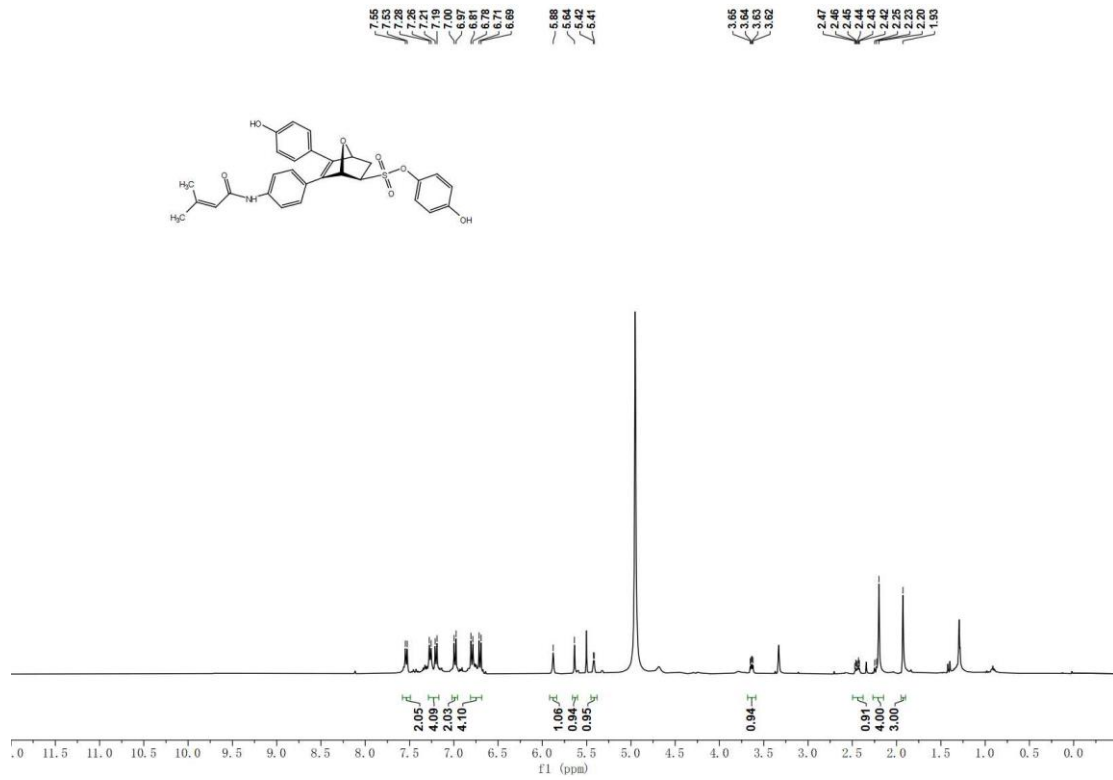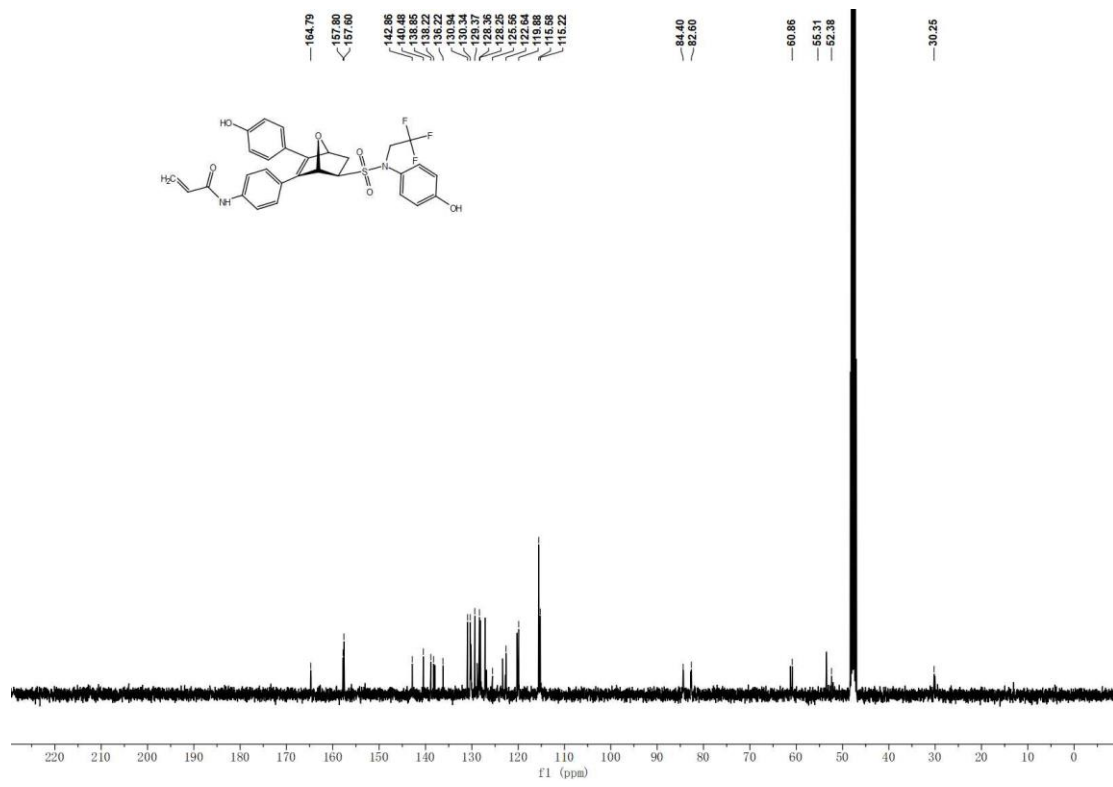



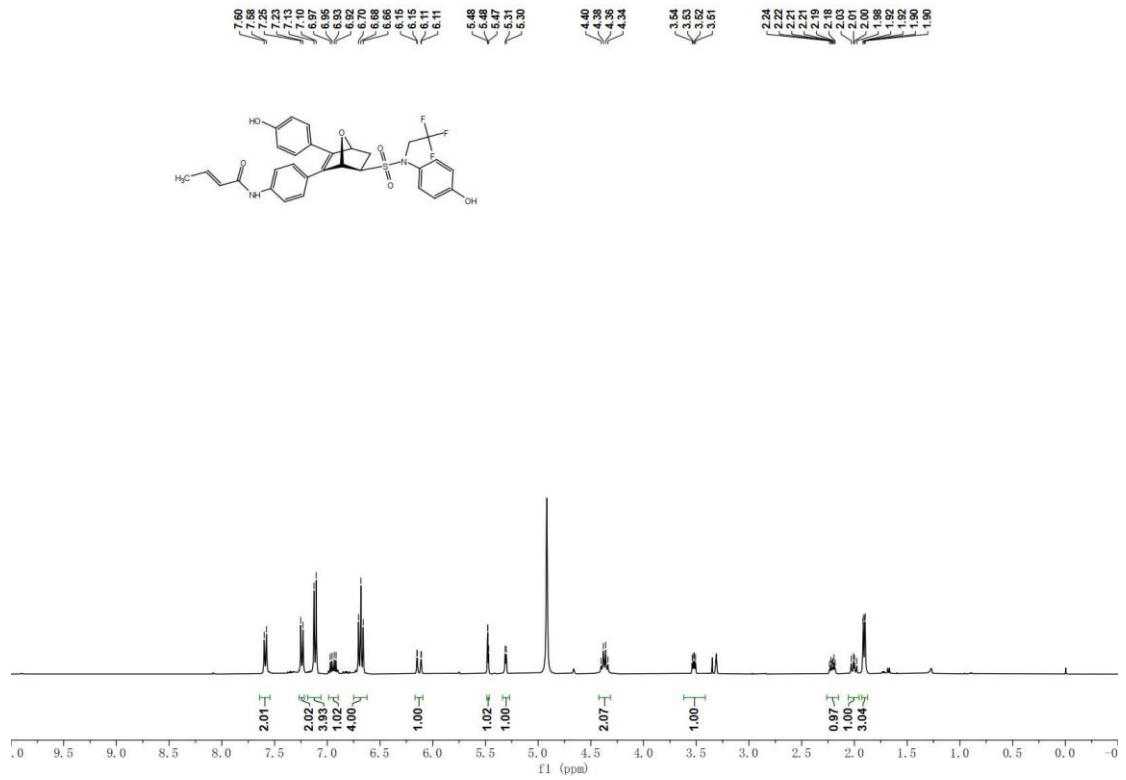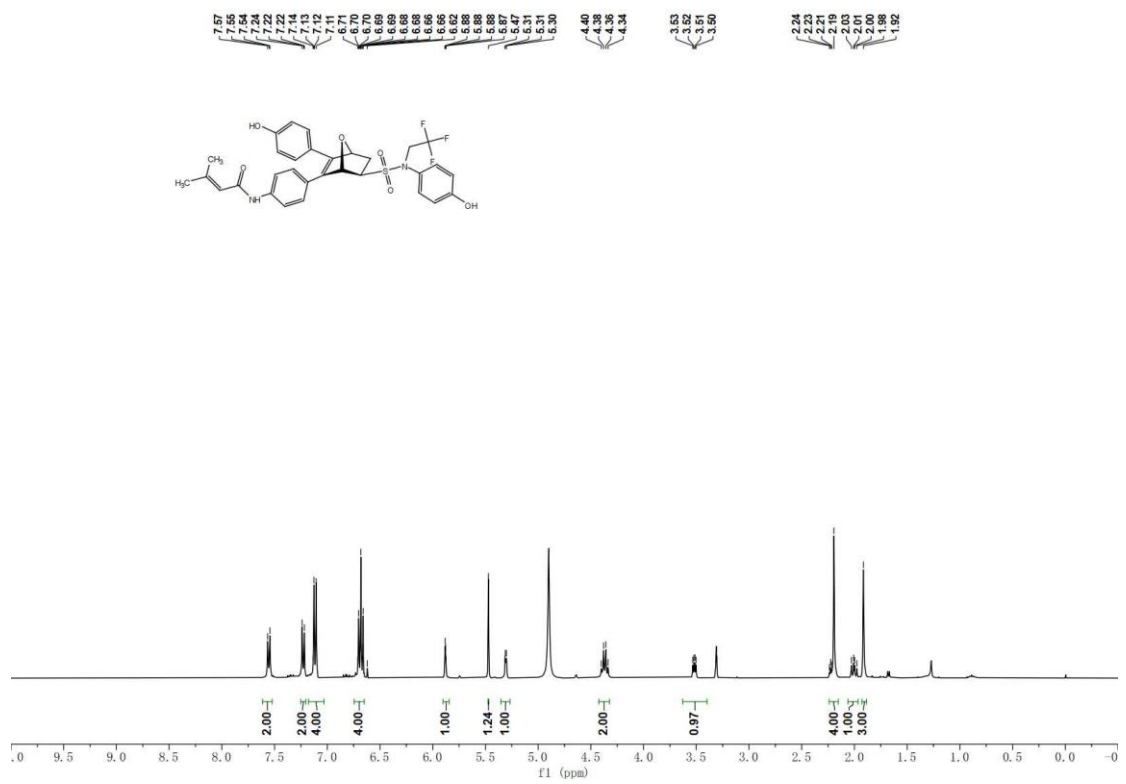

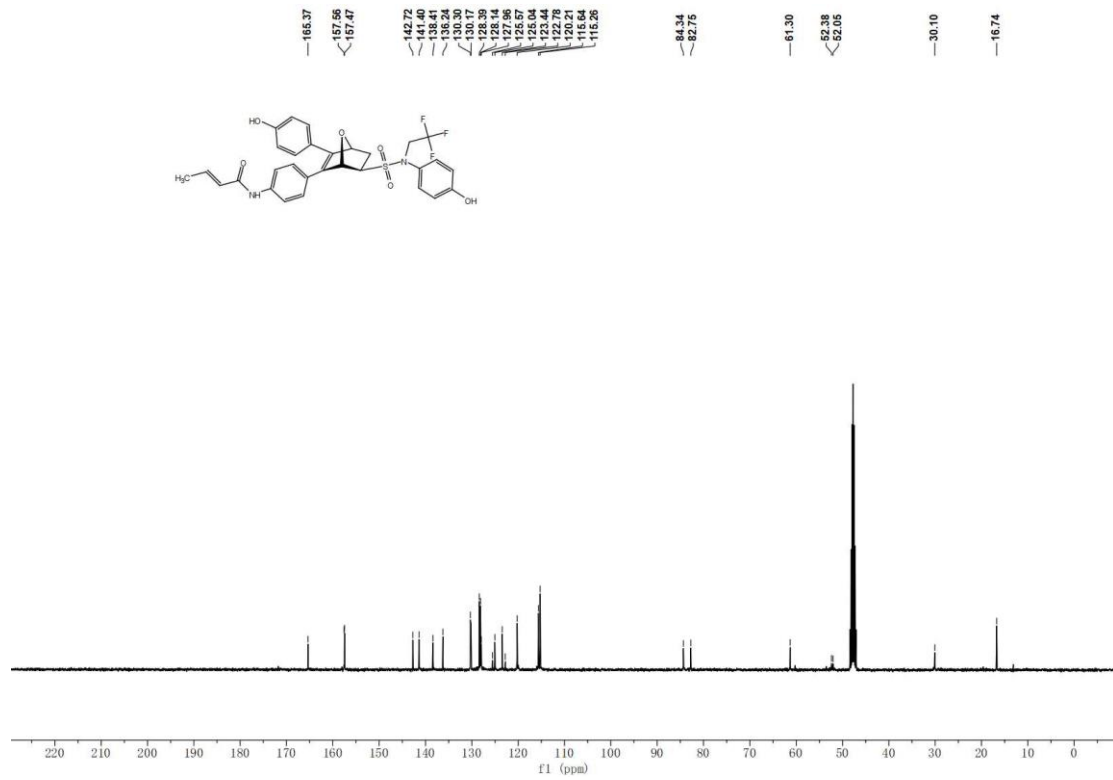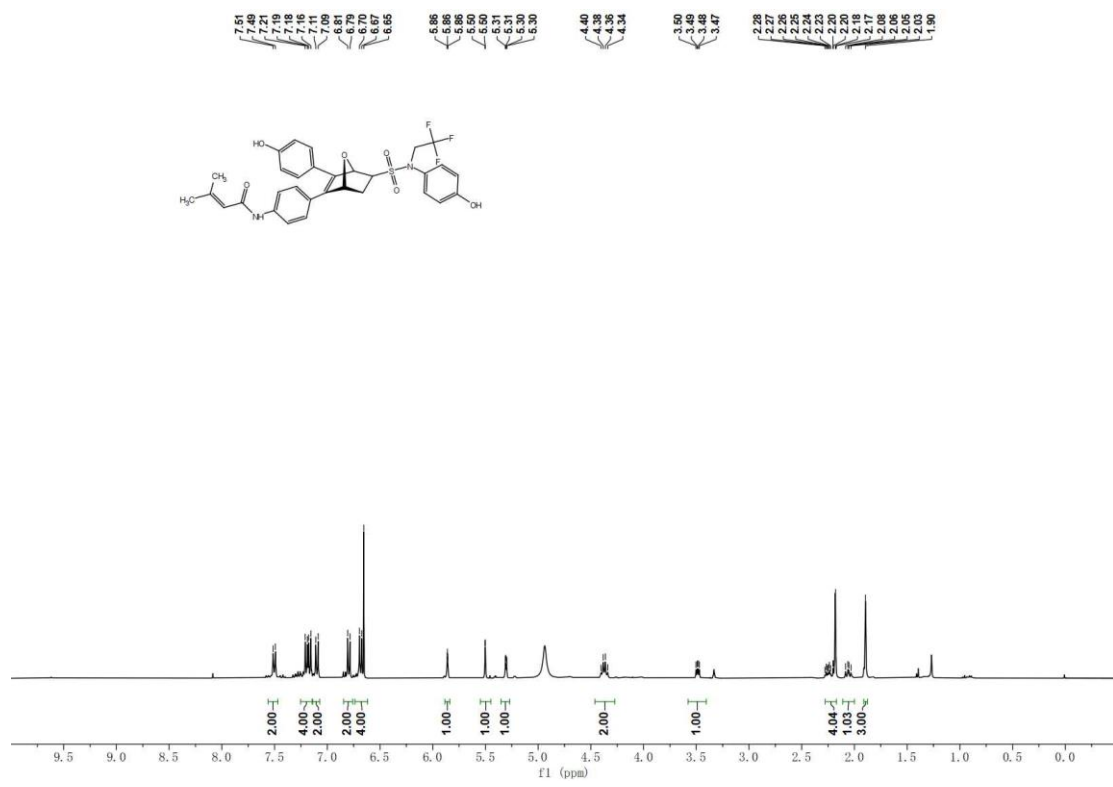



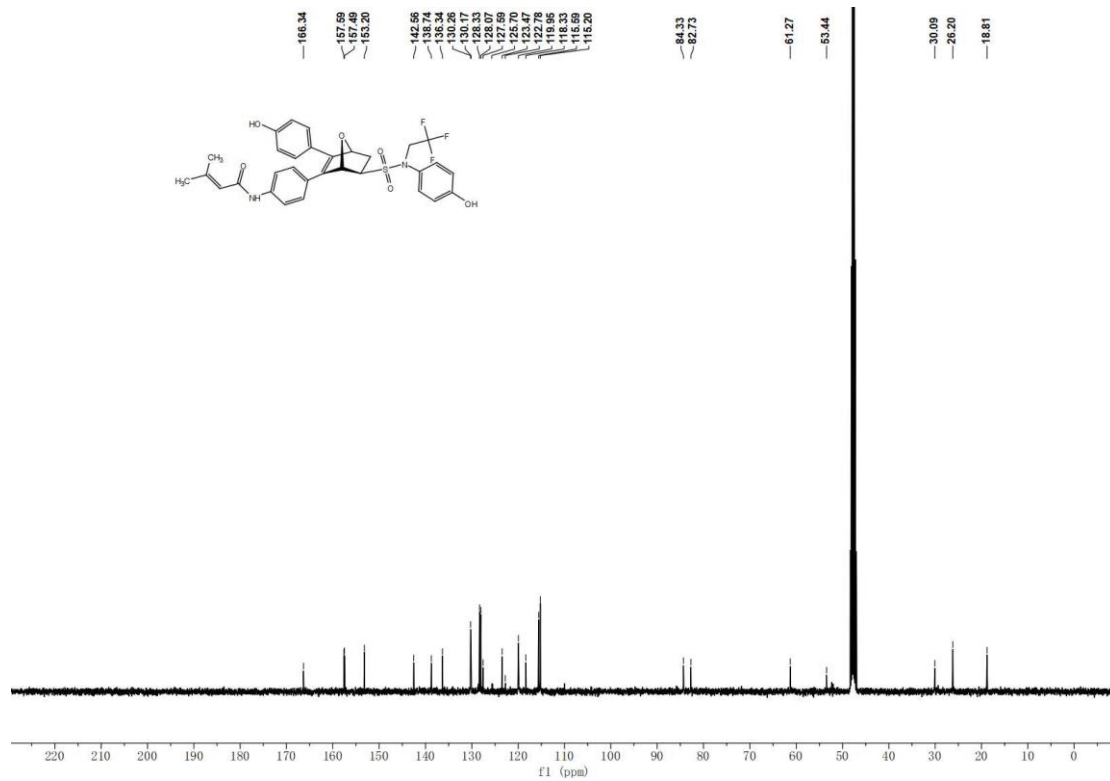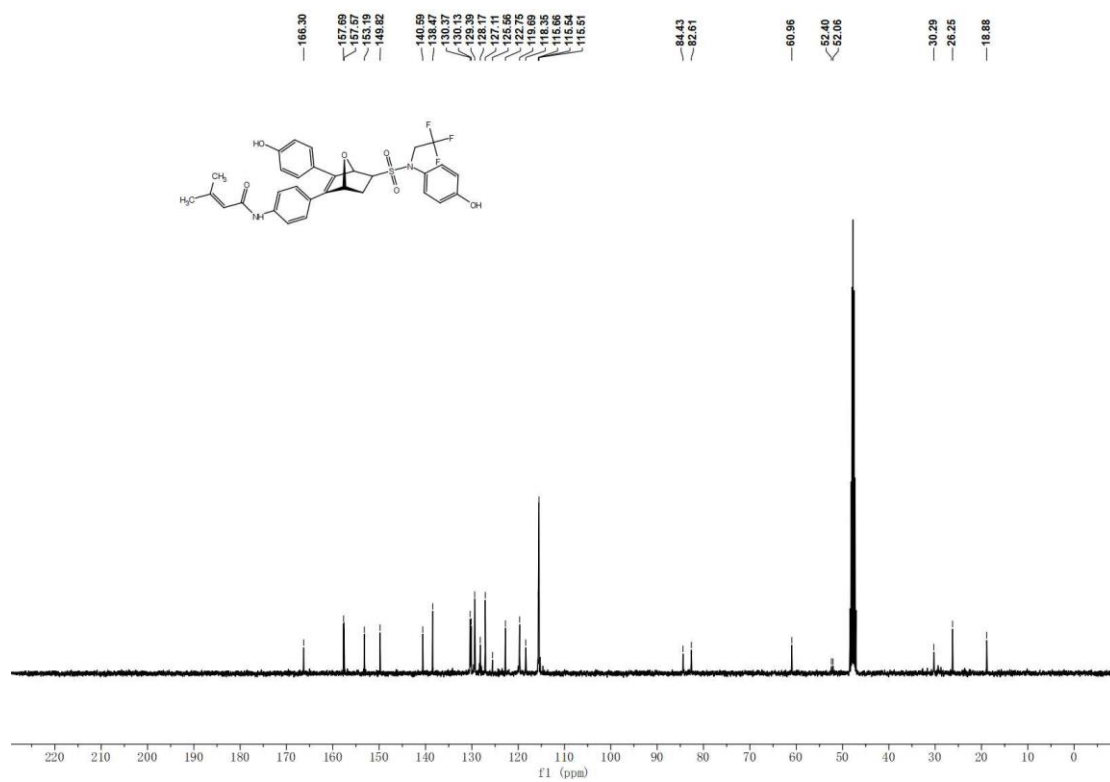

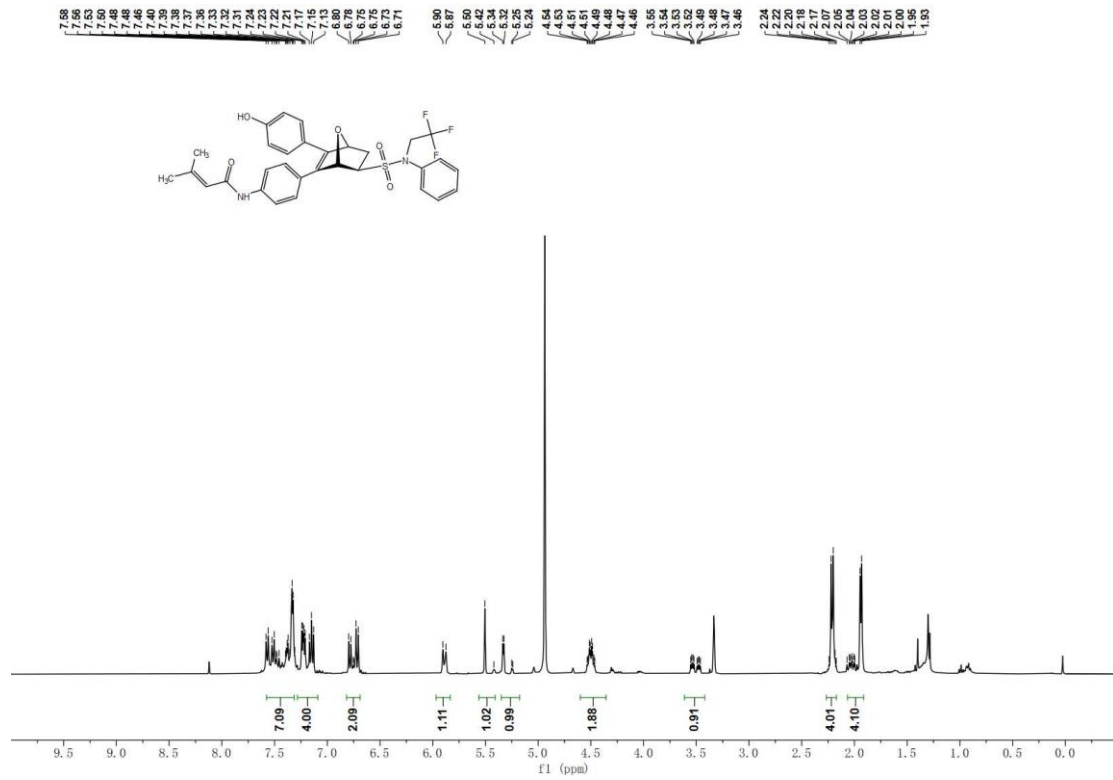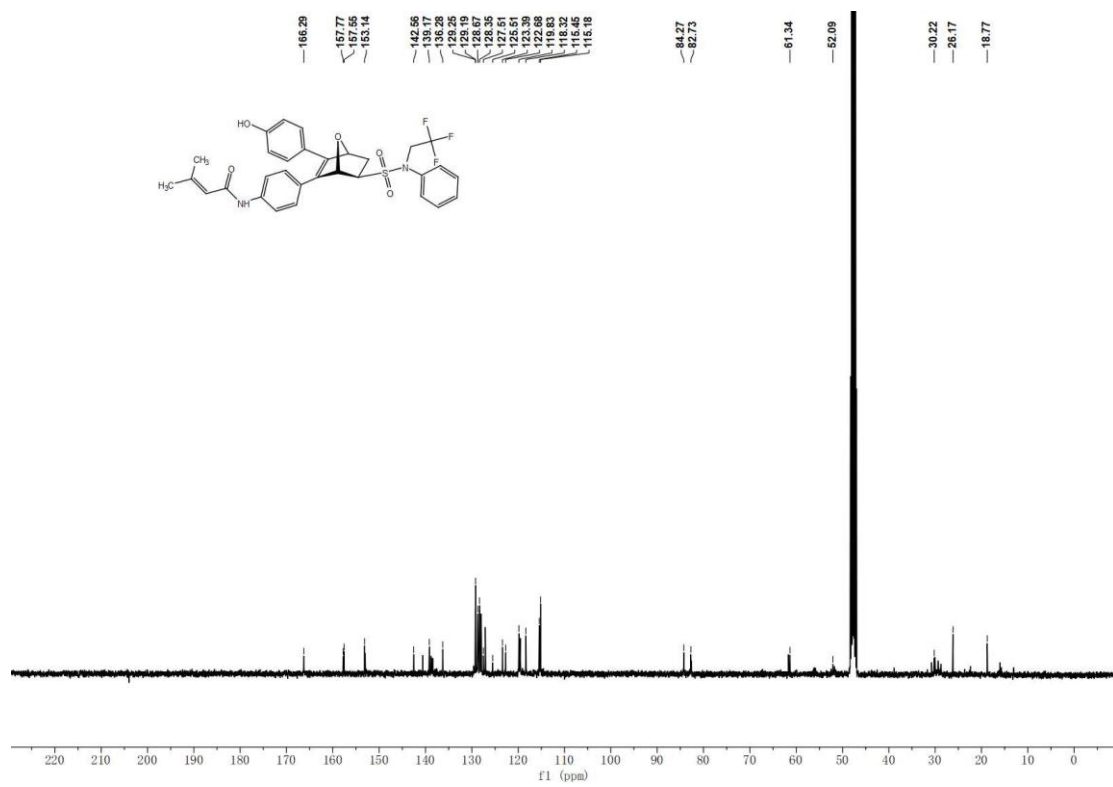

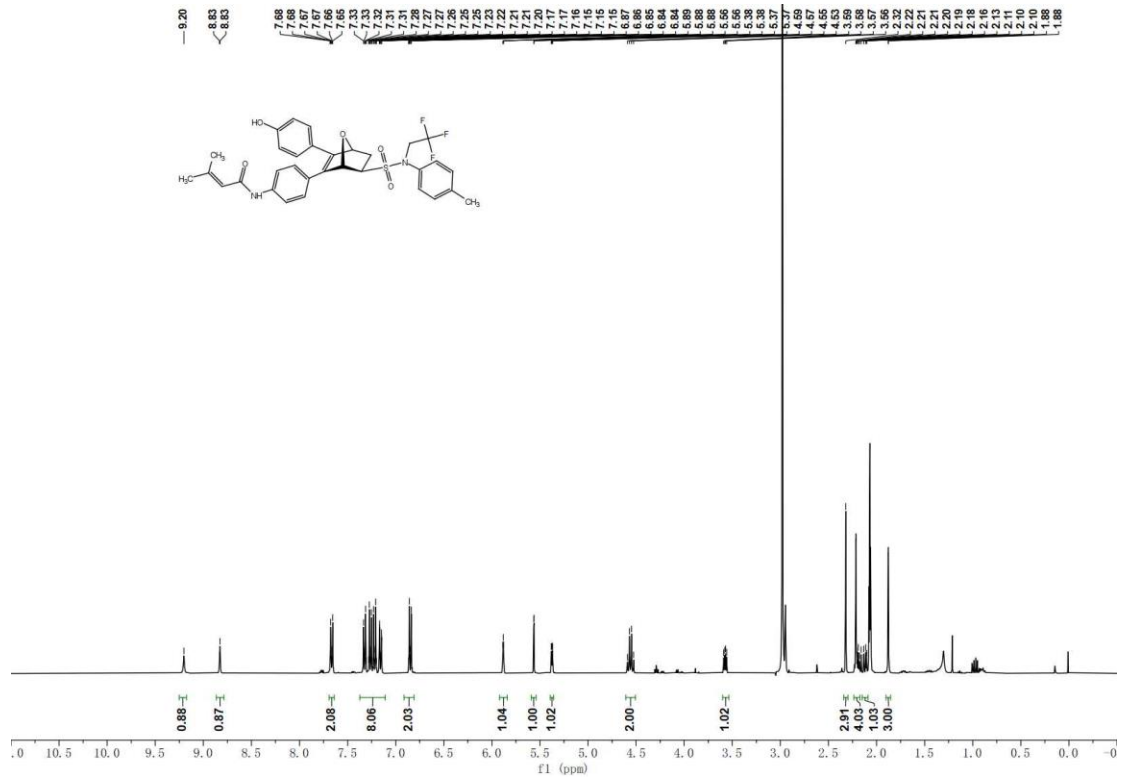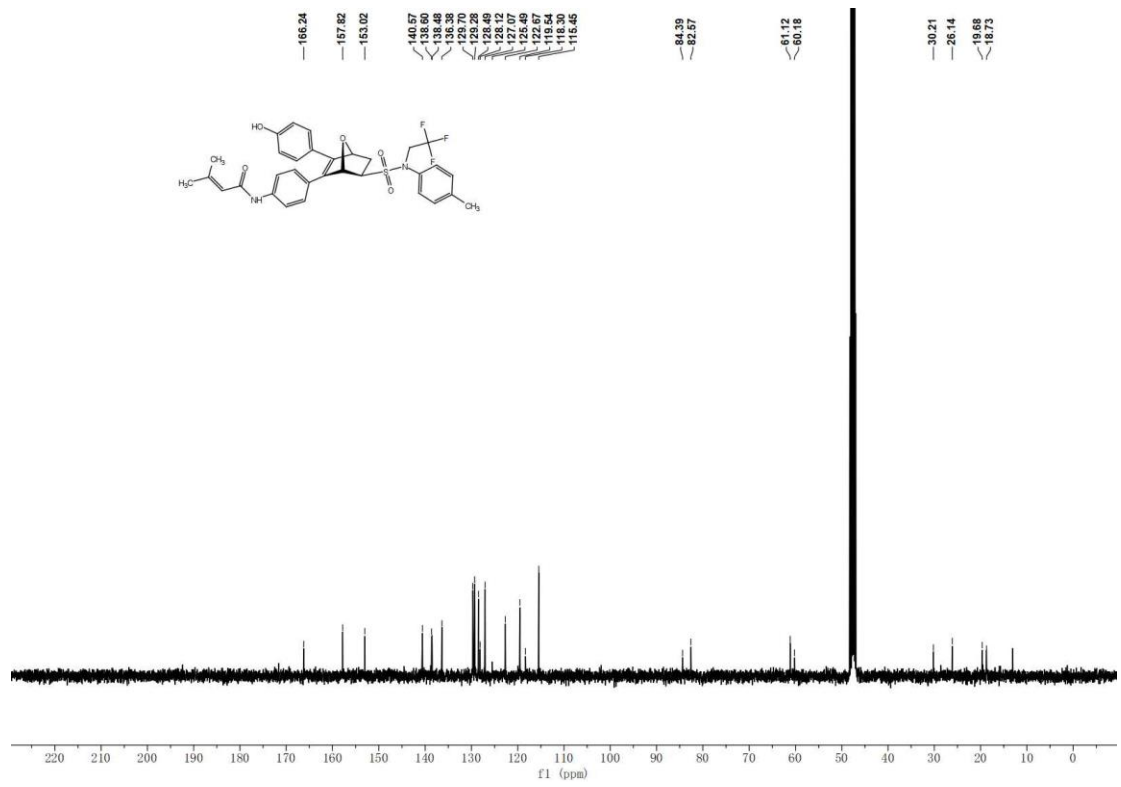

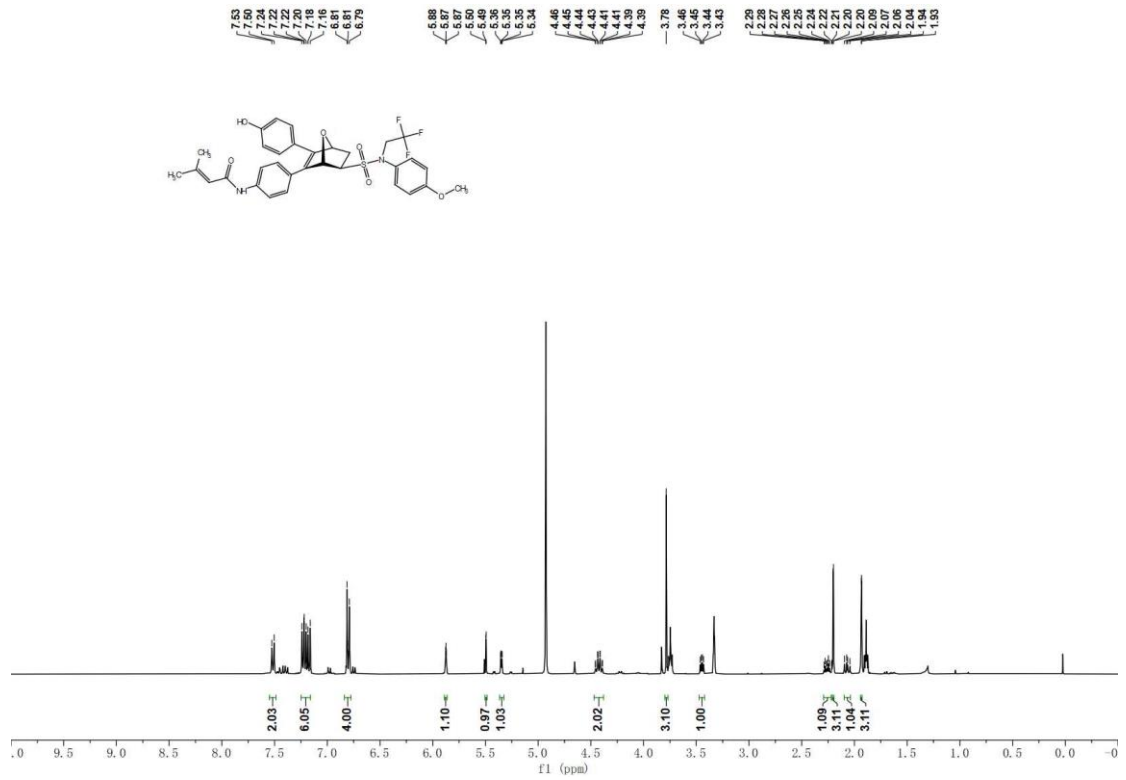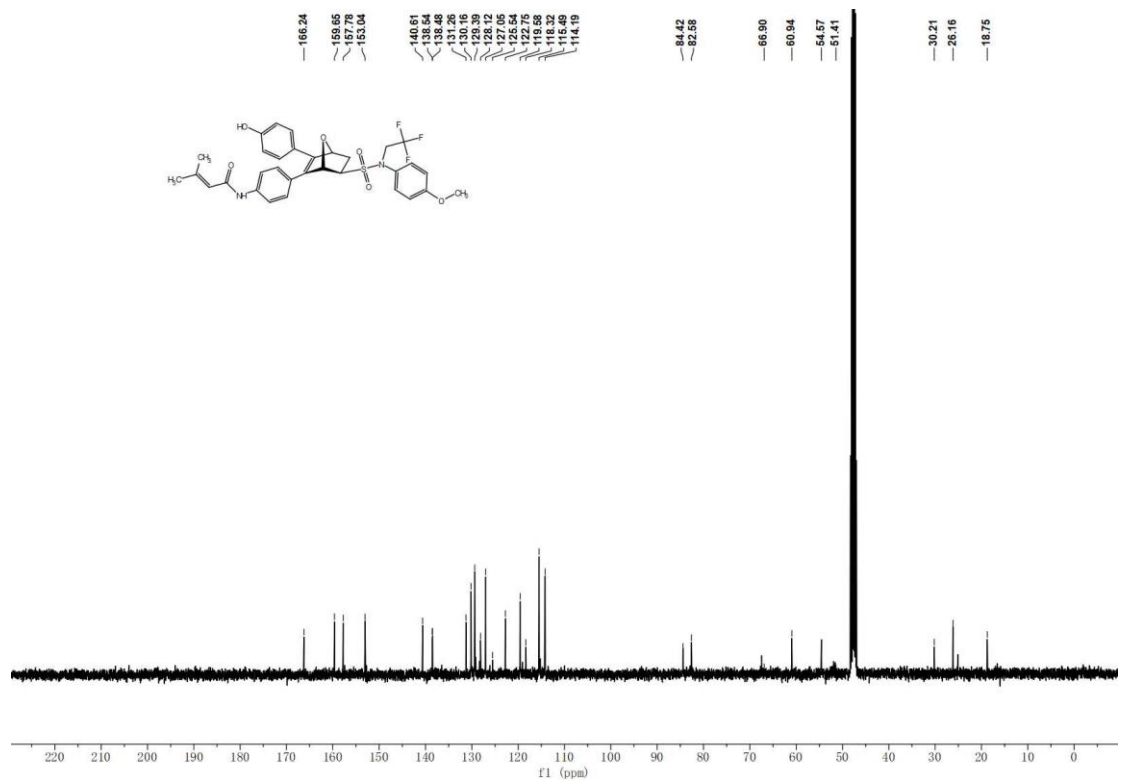

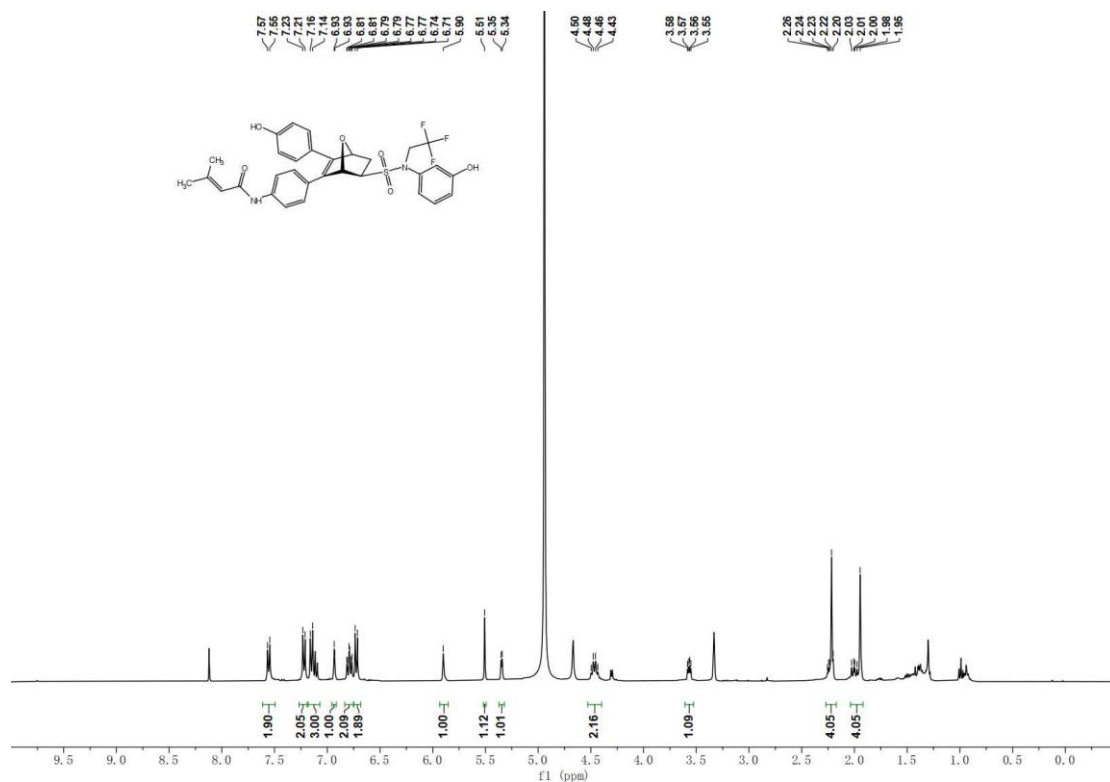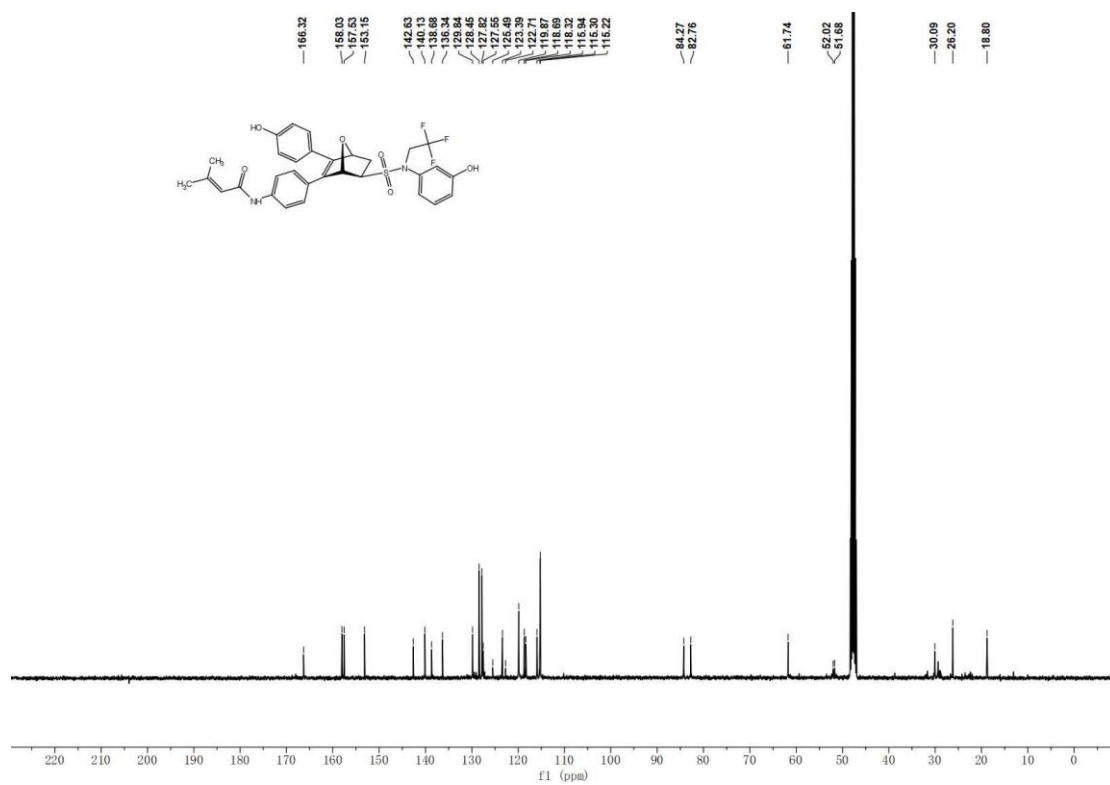

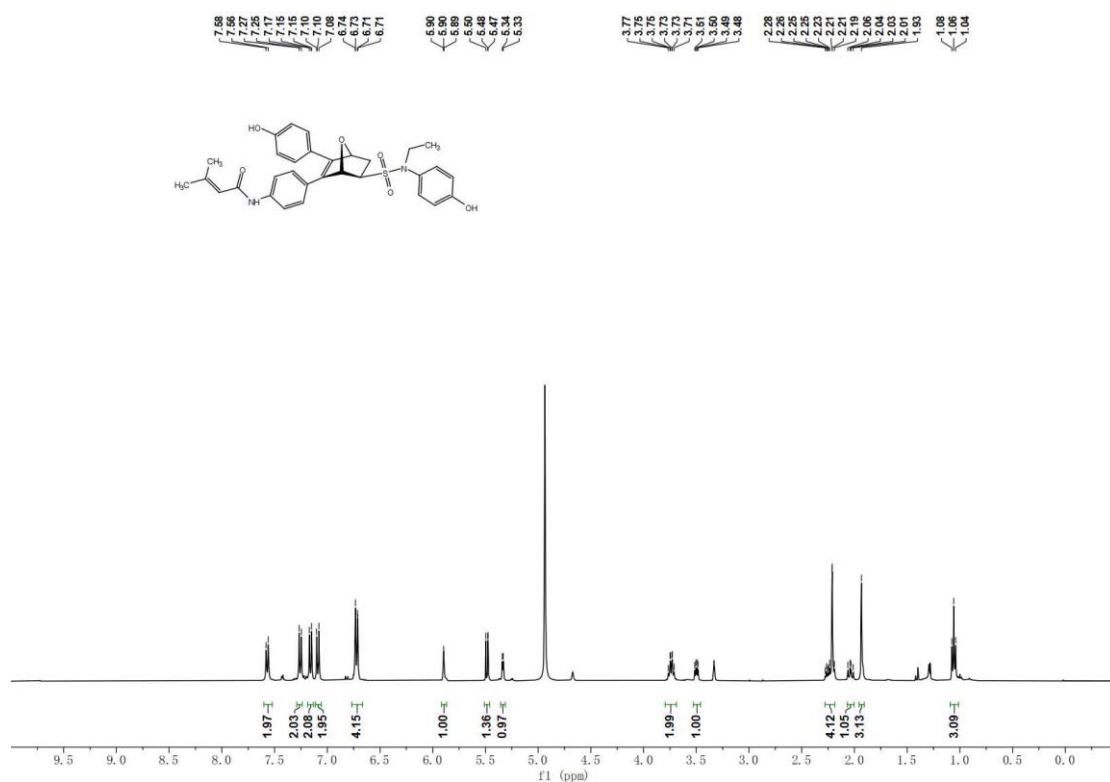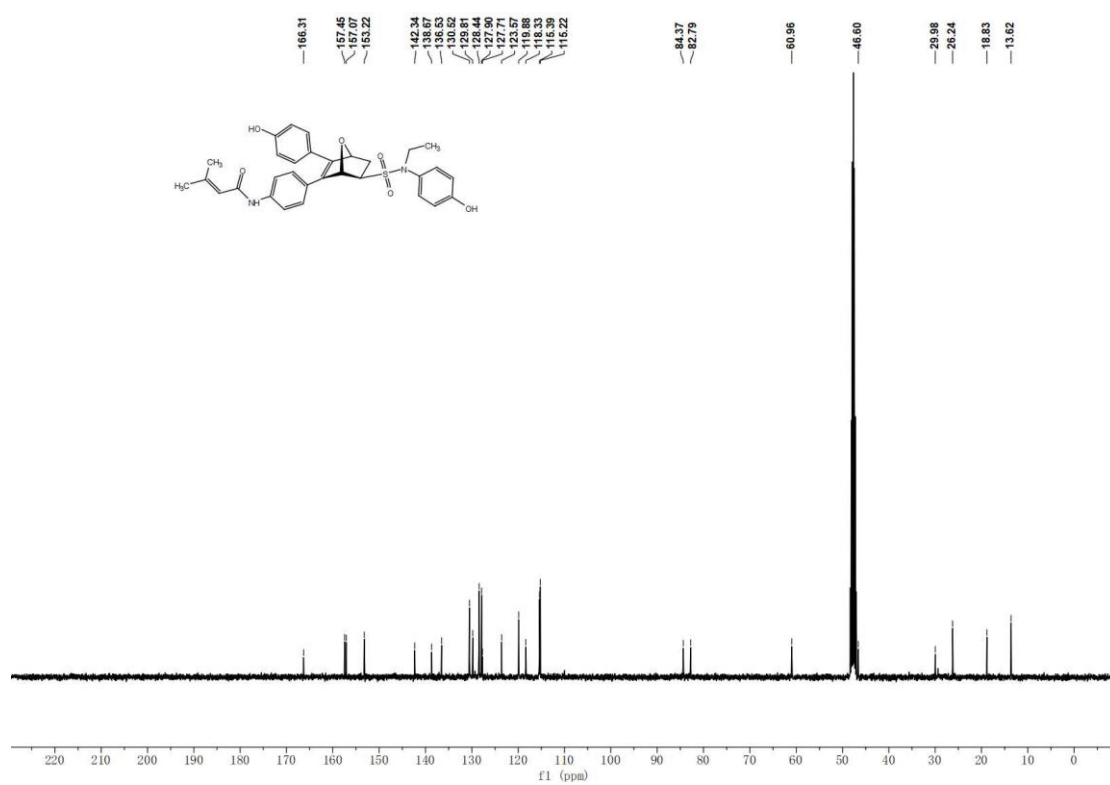

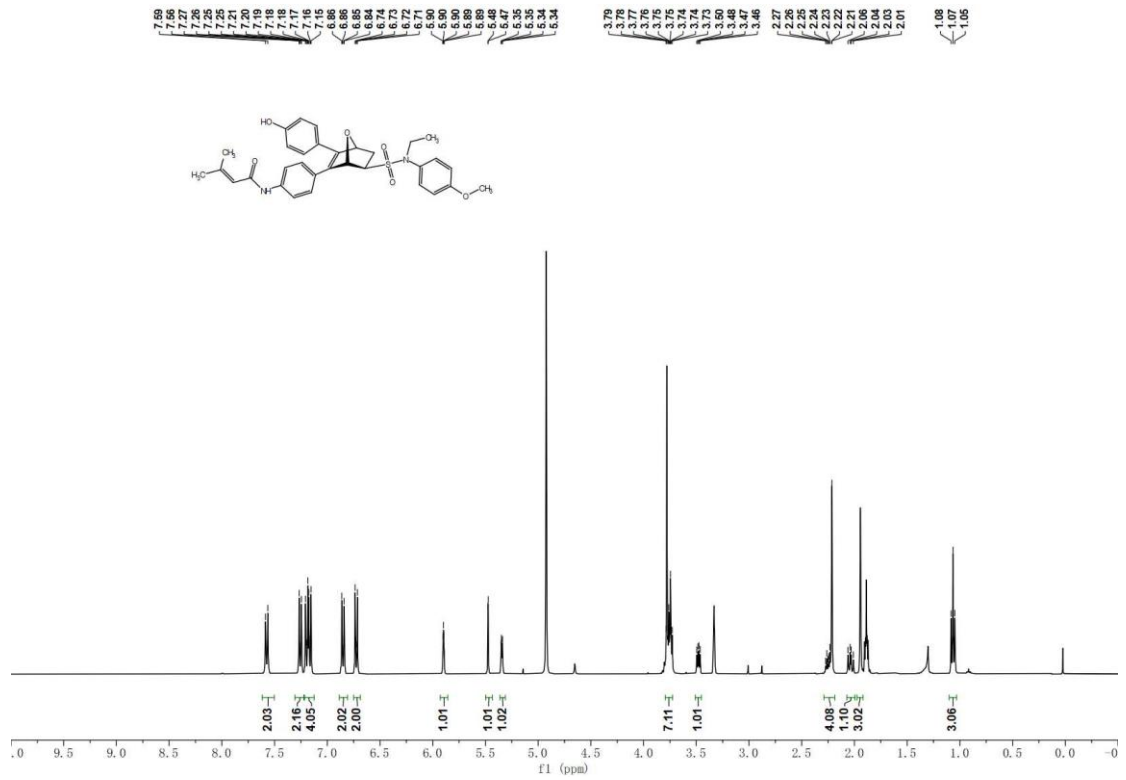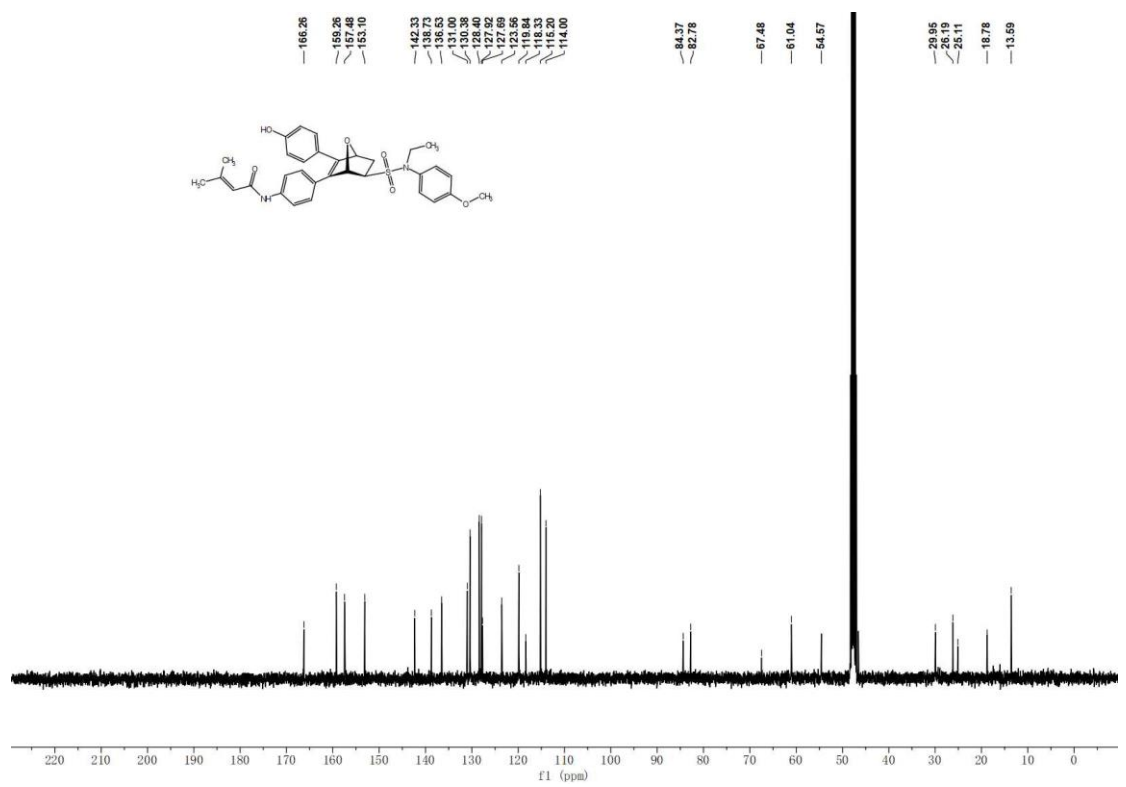

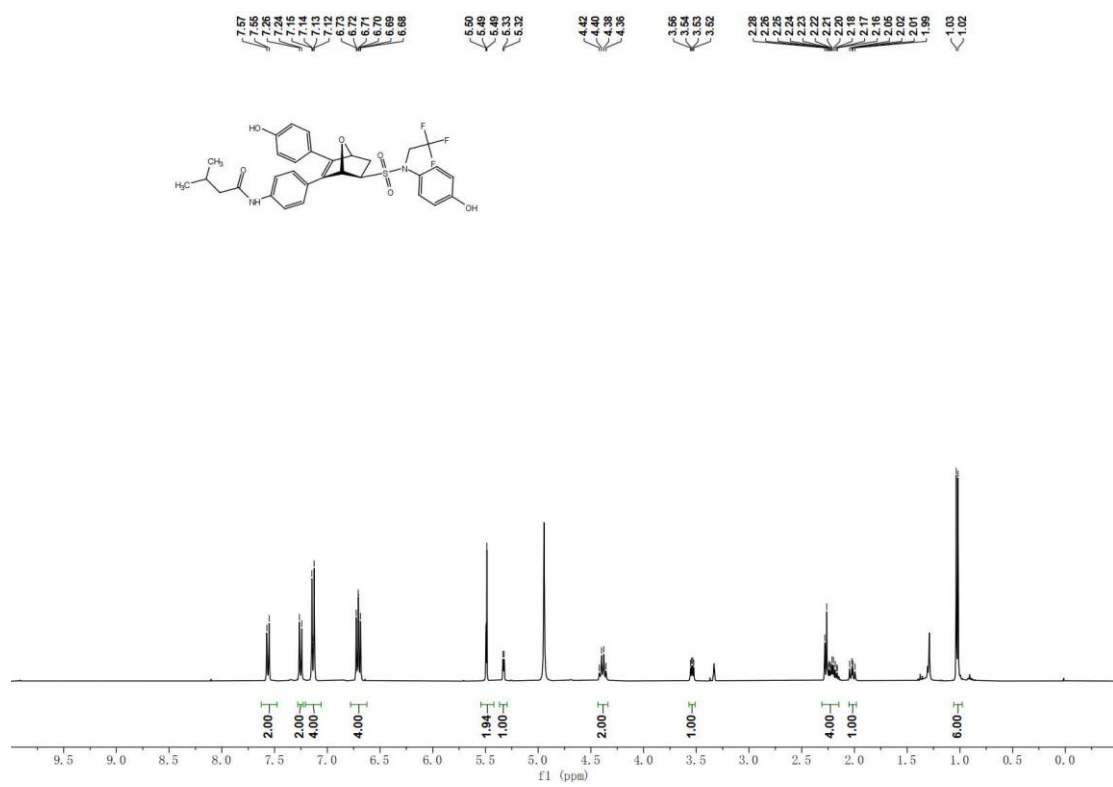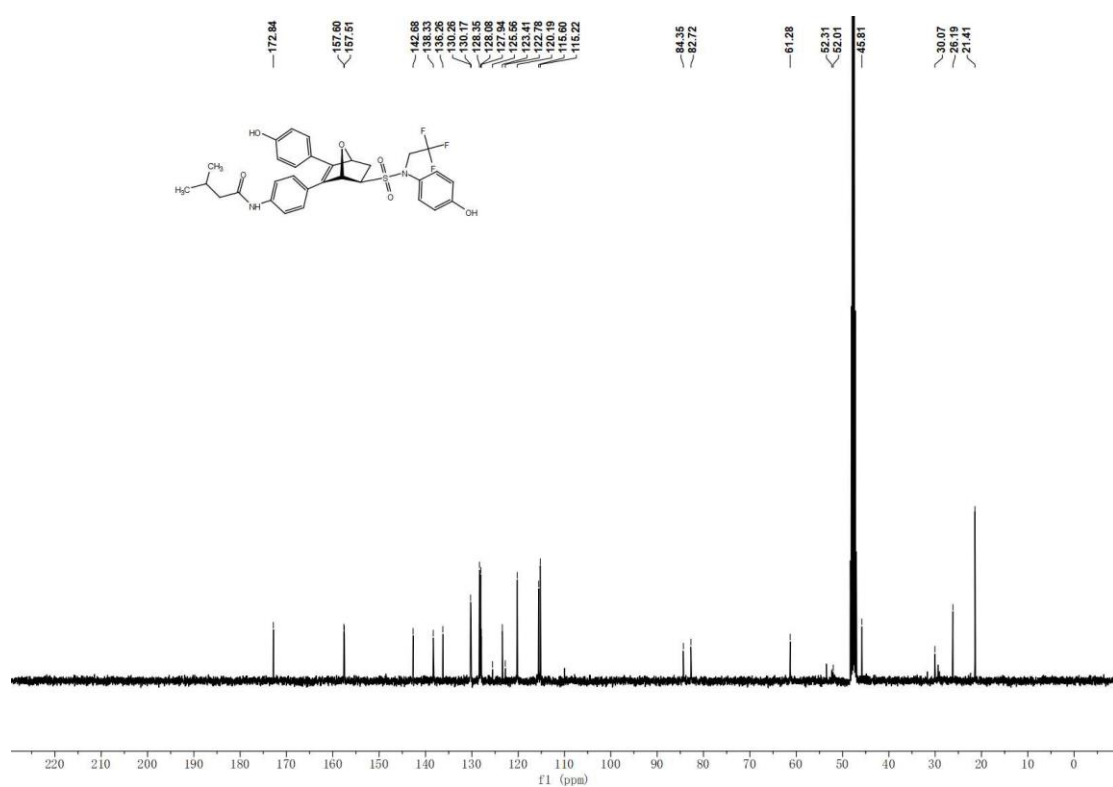



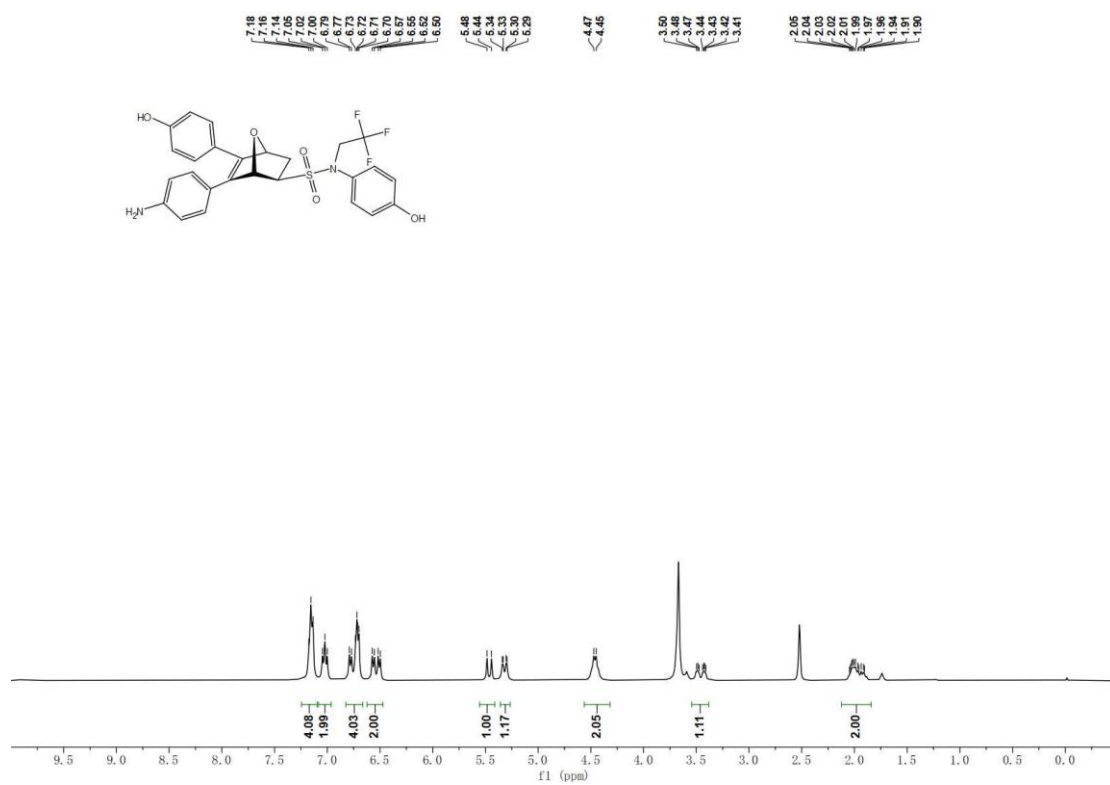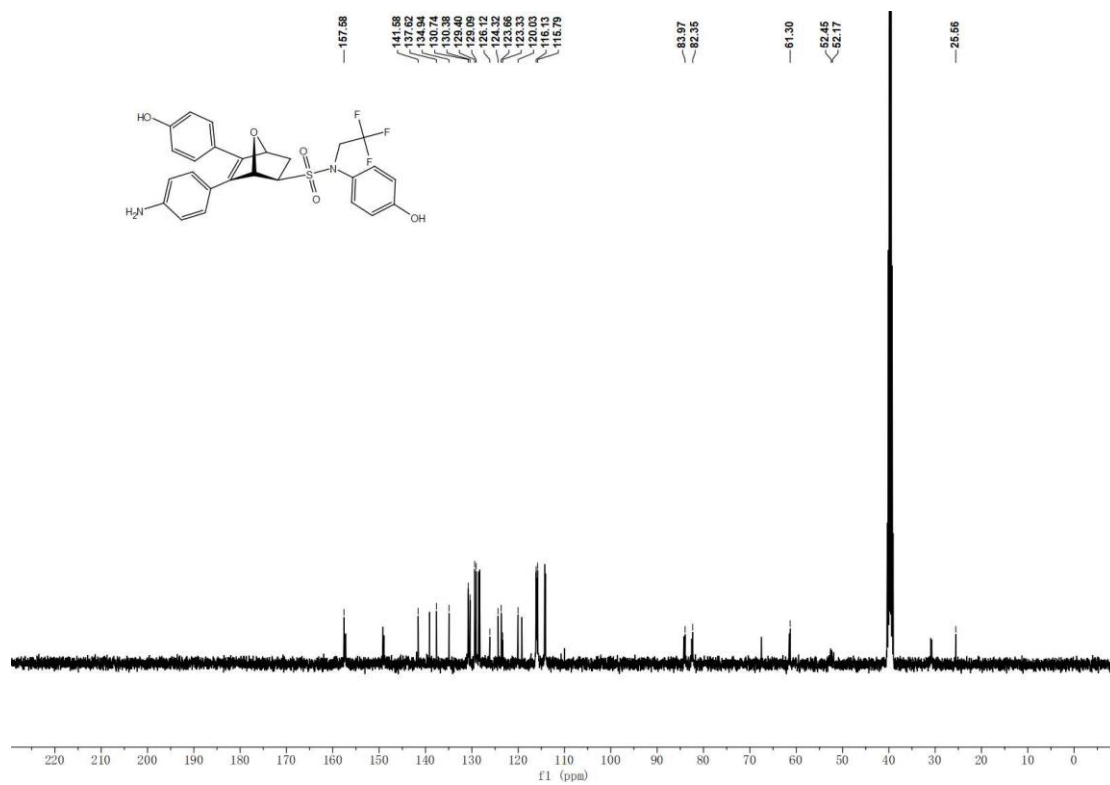

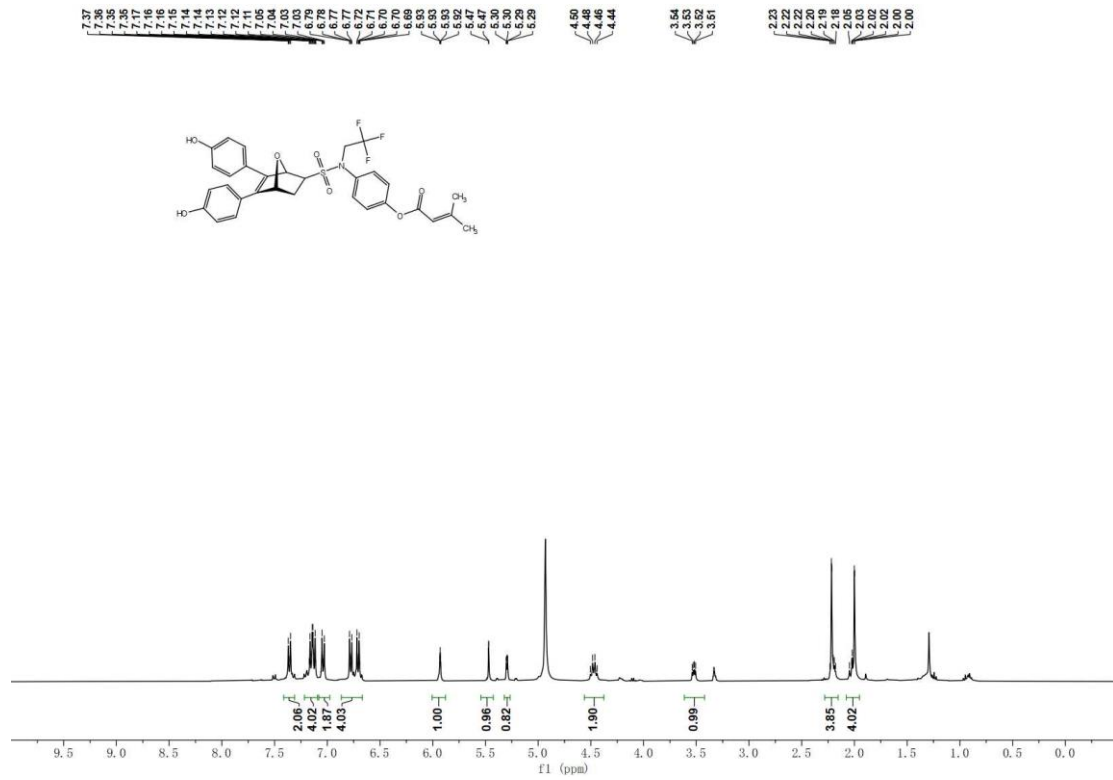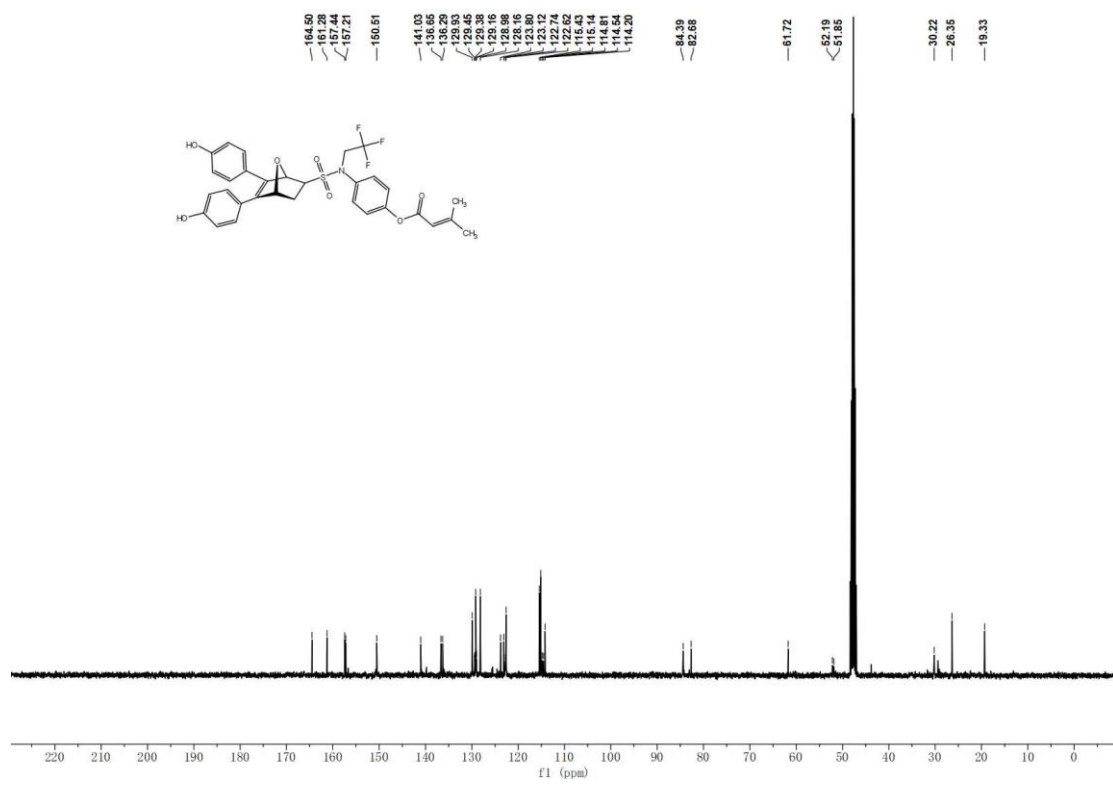

## PART VII. HPLC and HMRS spectra of final compounds

All the HPLC were conducted on Shimadzu LabSolutions LC and all the results were obtained under the condition of UV 254 nm.

**Table S3.** Ascertainment of purity by HPLC.

| Cmpd.      | Reverse Phase                | Ret. Time | Purity % | Cmpd.       | Reverse Phase                | Ret. Time | Purity % |
|------------|------------------------------|-----------|----------|-------------|------------------------------|-----------|----------|
| <b>26a</b> | 90:10 MeOH: H <sub>2</sub> O | 4.91      | 99.21    | <b>29b</b>  | 90:10 MeOH: H <sub>2</sub> O | 4.86      | 99.94    |
| <b>26b</b> | 90:10 MeOH: H <sub>2</sub> O | 5.45      | 96.68    | <b>29c</b>  | 90:10 MeOH: H <sub>2</sub> O | 4.66      | 99.91    |
| <b>26c</b> | 90:10 MeOH: H <sub>2</sub> O | 4.61      | 99.56    | <b>29c'</b> | 90:10 MeOH: H <sub>2</sub> O | 4.59      | 100      |
| <b>26d</b> | 90:10 MeOH: H <sub>2</sub> O | 4.13      | 98.71    | <b>29d</b>  | 90:10 MeOH: H <sub>2</sub> O | 5.29      | 99.89    |
| <b>26e</b> | 90:10 MeOH: H <sub>2</sub> O | 4.63      | 99.80    | <b>29e</b>  | 90:10 MeOH: H <sub>2</sub> O | 5.03      | 98.64    |
| <b>26f</b> | 90:10 MeOH: H <sub>2</sub> O | 4.66      | 100      | <b>29f</b>  | 90:10 MeOH: H <sub>2</sub> O | 5.03      | 99.73    |
| <b>28a</b> | 80:20 MeOH: H <sub>2</sub> O | 11.91     | 98.01    | <b>29g</b>  | 90:10 MeOH: H <sub>2</sub> O | 5.13      | 98.09    |
| <b>28b</b> | 80:20 MeOH: H <sub>2</sub> O | 9.00      | 99.15    | <b>29h</b>  | 90:10 MeOH: H <sub>2</sub> O | 4.64      | 99.88    |
| <b>28c</b> | 80:20 MeOH: H <sub>2</sub> O | 11.27     | 99.44    | <b>29i</b>  | 90:10 MeOH: H <sub>2</sub> O | 4.71      | 99.56    |
| <b>28d</b> | 80:20 MeOH: H <sub>2</sub> O | 13.84     | 100      | <b>29j</b>  | 90:10 MeOH: H <sub>2</sub> O | 5.22      | 100      |
| <b>28e</b> | 80:20 MeOH: H <sub>2</sub> O | 15.76     | 95.32    | <b>29k</b>  | 90:10 MeOH: H <sub>2</sub> O | 4.73      | 99.87    |
| <b>28f</b> | 80:20 MeOH: H <sub>2</sub> O | 11.70     | 99.28    | <b>29l</b>  | 90:10 MeOH: H <sub>2</sub> O | 4.59      | 98.96    |
| <b>29a</b> | 80:20 MeOH: H <sub>2</sub> O | 5.13      | 99.87    | <b>29m</b>  | 90:10 MeOH: H <sub>2</sub> O | 4.99      | 98.42    |

HPLC chromatogram of **26a**. Reverse Phase (Method 90:10 CH<sub>3</sub>OH: H<sub>2</sub>O, Flow rate 0.7 mL/min).

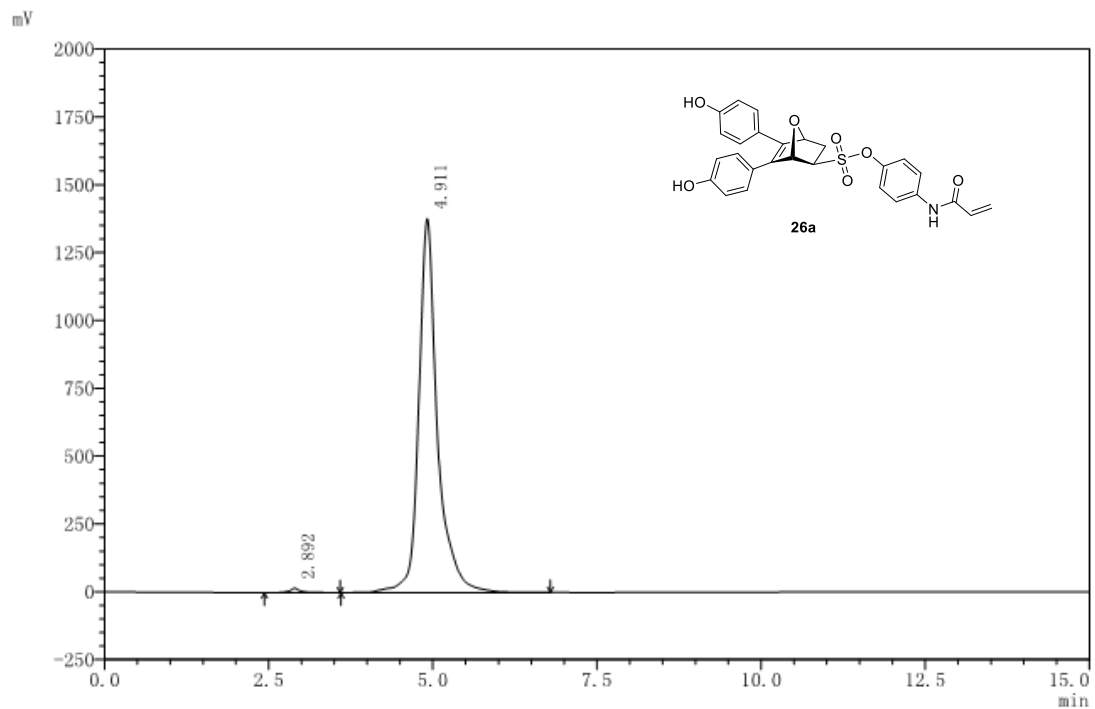

| NO.   | Retention Time | Area     | Percent |
|-------|----------------|----------|---------|
| 1     | 2.892          | 217701   | 0.786   |
| 2     | 4.911          | 27466493 | 99.214  |
| Total |                |          | 100.000 |

HRMS (ESI) calcd for C<sub>27</sub>H<sub>23</sub>NO<sub>7</sub>S [M + Na]<sup>+</sup> 528.1087, found 528.1087.

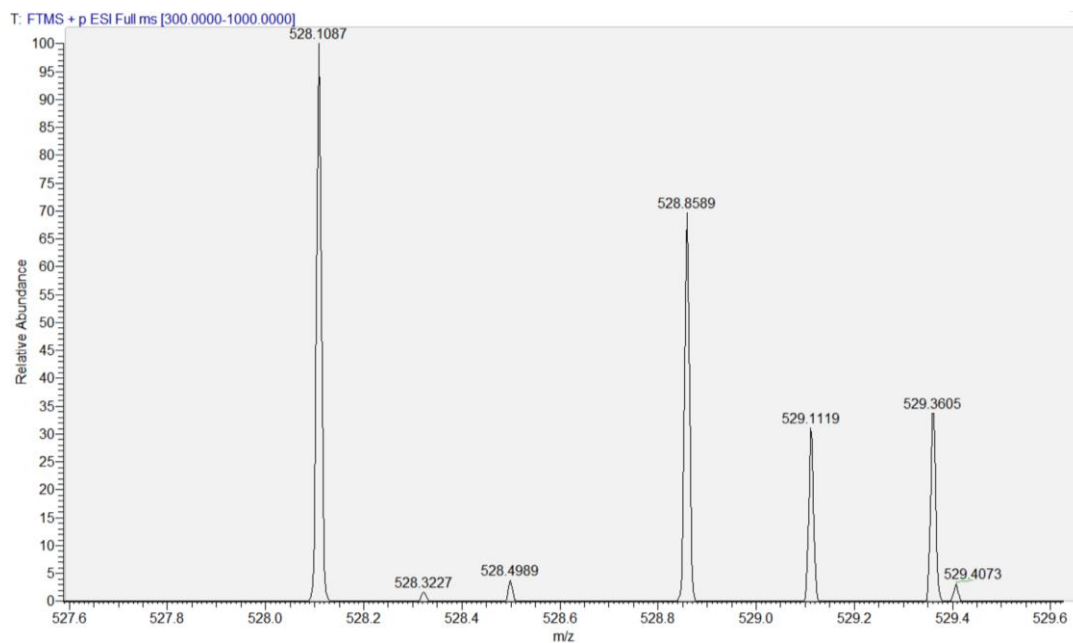

HPLC chromatogram of **26b**. Reverse Phase (Method 90:10 CH<sub>3</sub>OH: H<sub>2</sub>O, Flow rate 0.7 mL/min).

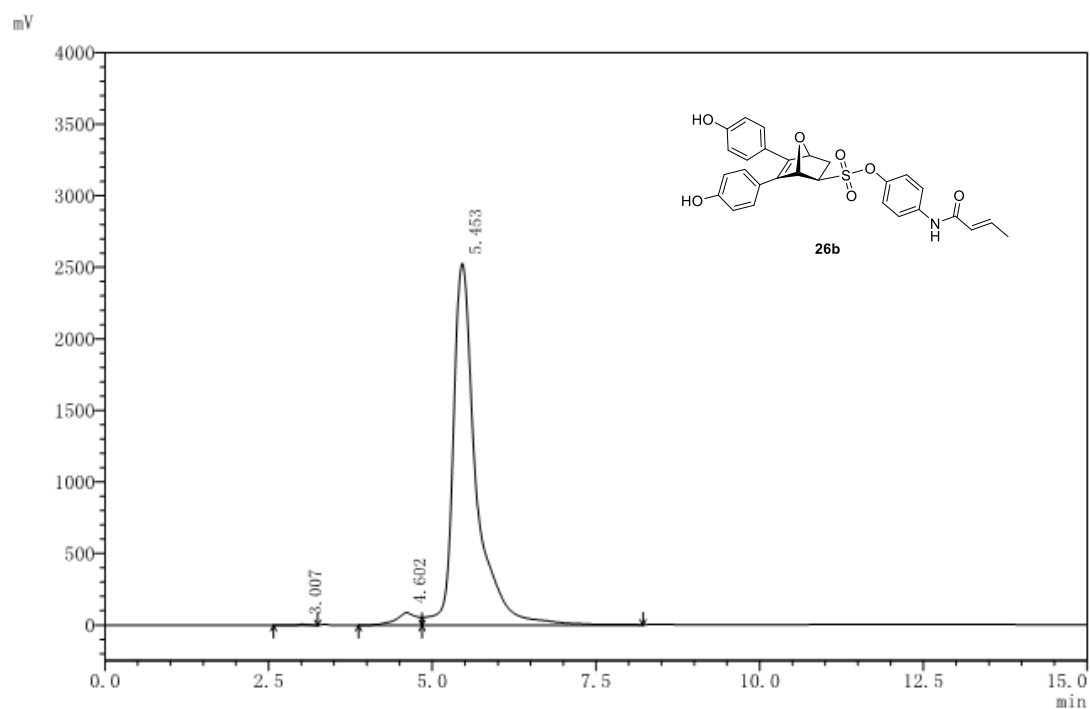

| NO. | Retention Time | Area    | Percent |
|-----|----------------|---------|---------|
| 1   | 3.007          | 110787  | 0.173   |
| 2   | 4.602          | 2021108 | 3.152   |

|       |       |          |         |
|-------|-------|----------|---------|
| 3     | 5.453 | 61998968 | 96.676  |
| Total |       |          | 100.000 |

HRMS (ESI) calcd for C<sub>28</sub>H<sub>25</sub>NO<sub>7</sub>S [M + Na]<sup>+</sup> 542.1244, found 542.1246.

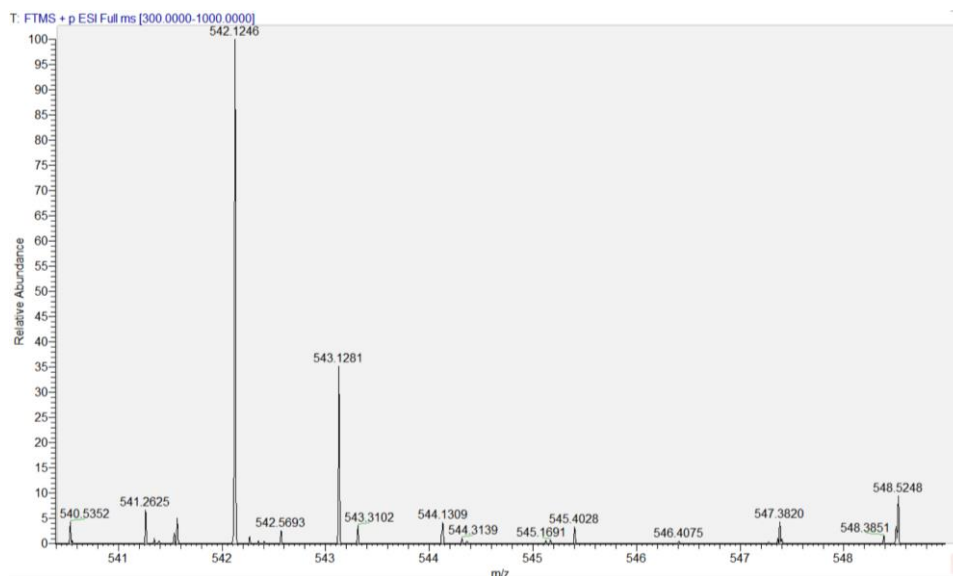

HPLC chromatogram of **26c**. Reverse Phase (Method 90:10 CH<sub>3</sub>OH: H<sub>2</sub>O, Flow rate 0.7 mL/min).

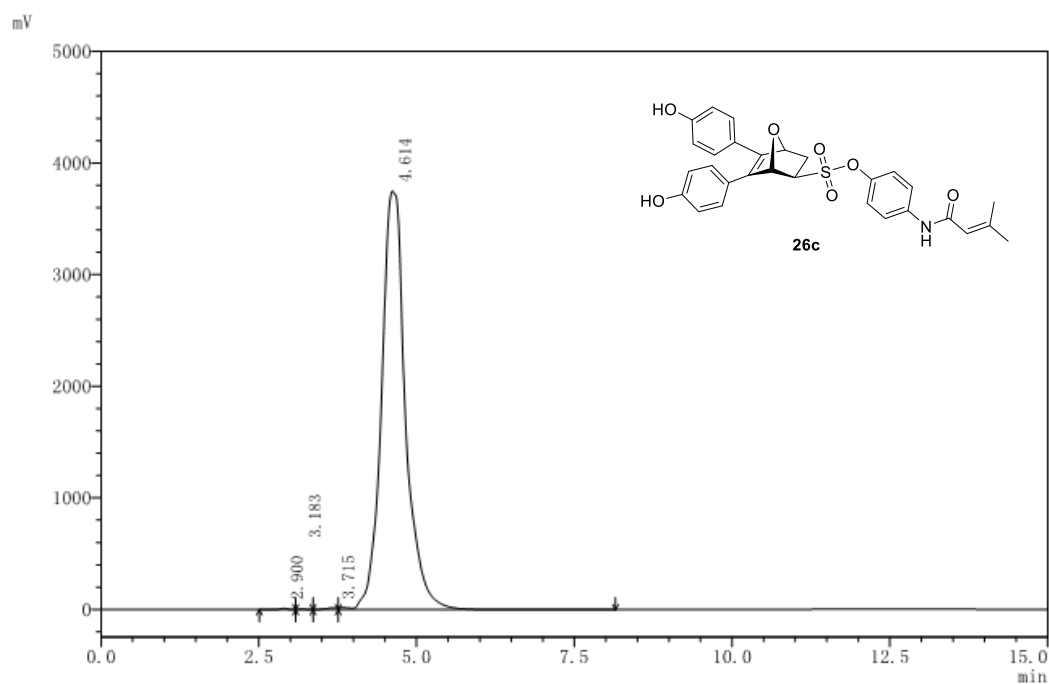

| No. | Retention Time | Area   | Percent |
|-----|----------------|--------|---------|
| 1   | 2.900          | 136768 | 0.137   |
| 2   | 3.183          | 64467  | 0.064   |

|       |       |          |         |
|-------|-------|----------|---------|
| 3     | 3.715 | 234892   | 0.235   |
| 4     | 4.614 | 99640073 | 99.564  |
| Total |       |          | 100.000 |

HRMS (ESI) calcd for C<sub>29</sub>H<sub>27</sub>NO<sub>7</sub>S [M + Na]<sup>+</sup> 556.1400, found 556.1399.

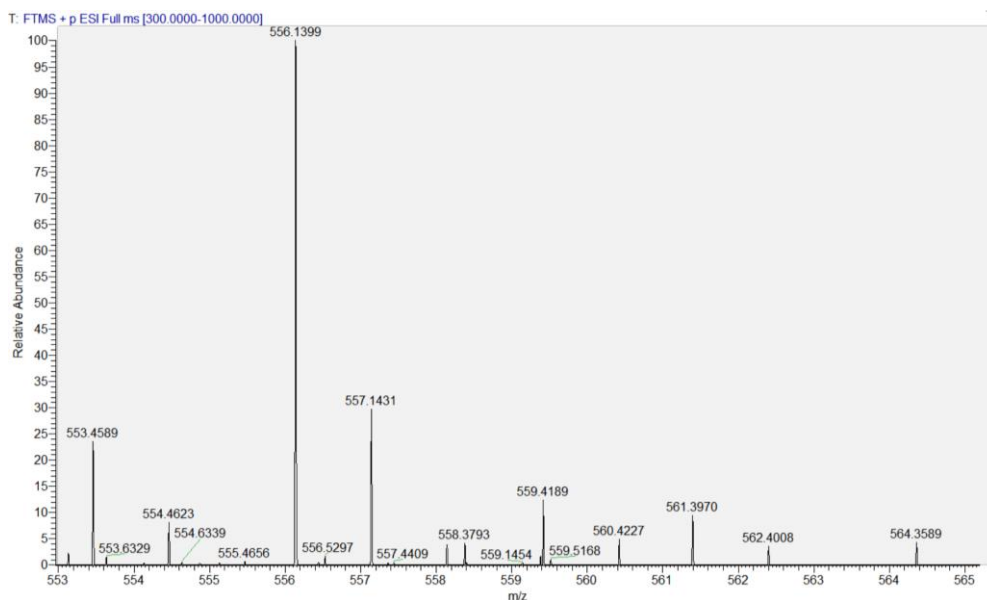

HPLC chromatogram of **26d**. Reverse Phase (Method 90:10 CH<sub>3</sub>OH: H<sub>2</sub>O, Flow rate 0.7 mL/min).

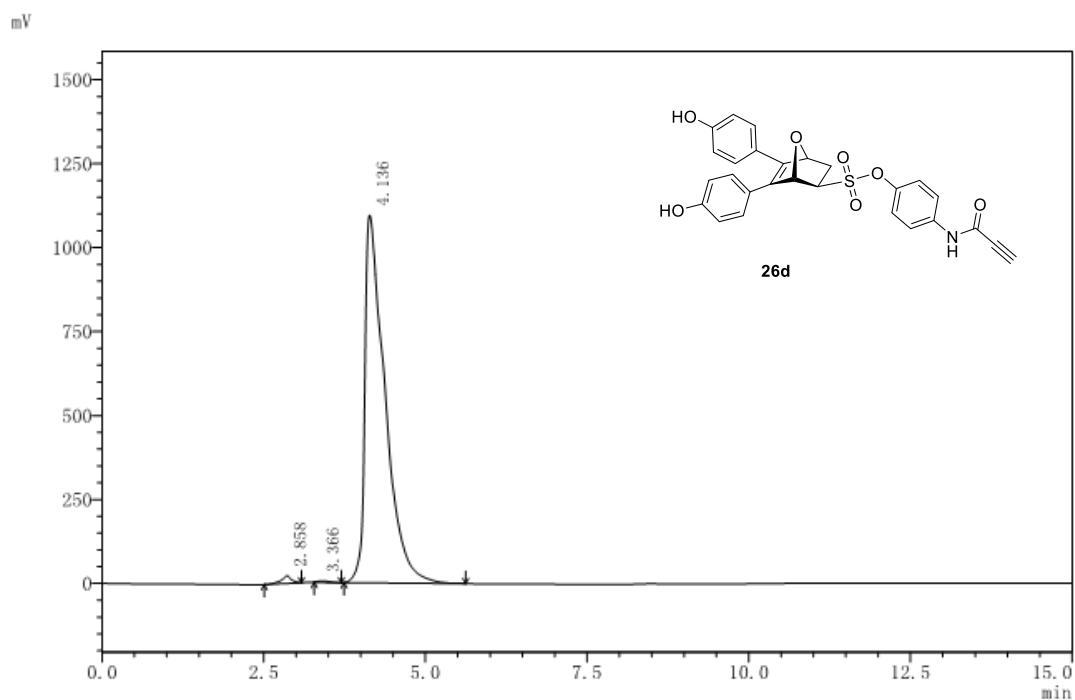

| NO. | Retention Time | Area | Percent |
|-----|----------------|------|---------|
|-----|----------------|------|---------|

|       |       |          |         |
|-------|-------|----------|---------|
| 1     | 2.858 | 256624   | 1.068   |
| 2     | 3.366 | 53802    | 0.224   |
| 3     | 4.136 | 23727744 | 98.709  |
| Total |       |          | 100.000 |

HRMS (ESI) calcd for C<sub>27</sub>H<sub>21</sub>NO<sub>7</sub>S [M + Na]<sup>+</sup> 526.0931, found 526.0931.

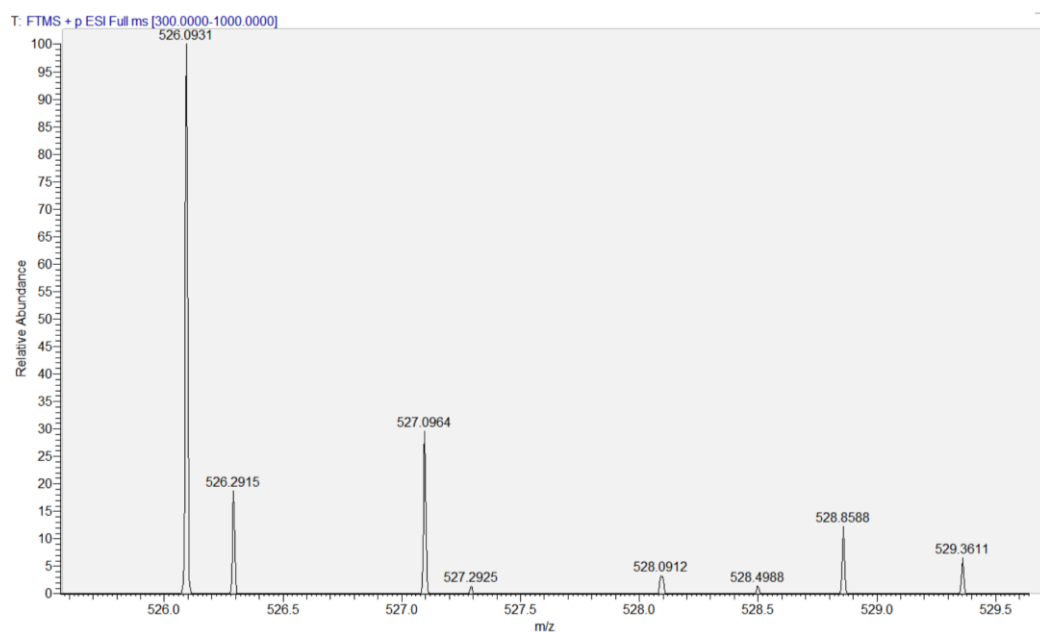

HPLC chromatogram of **26e**. Reverse Phase (Method 90:10 CH<sub>3</sub>OH: H<sub>2</sub>O, Flow rate 0.7 mL/min).

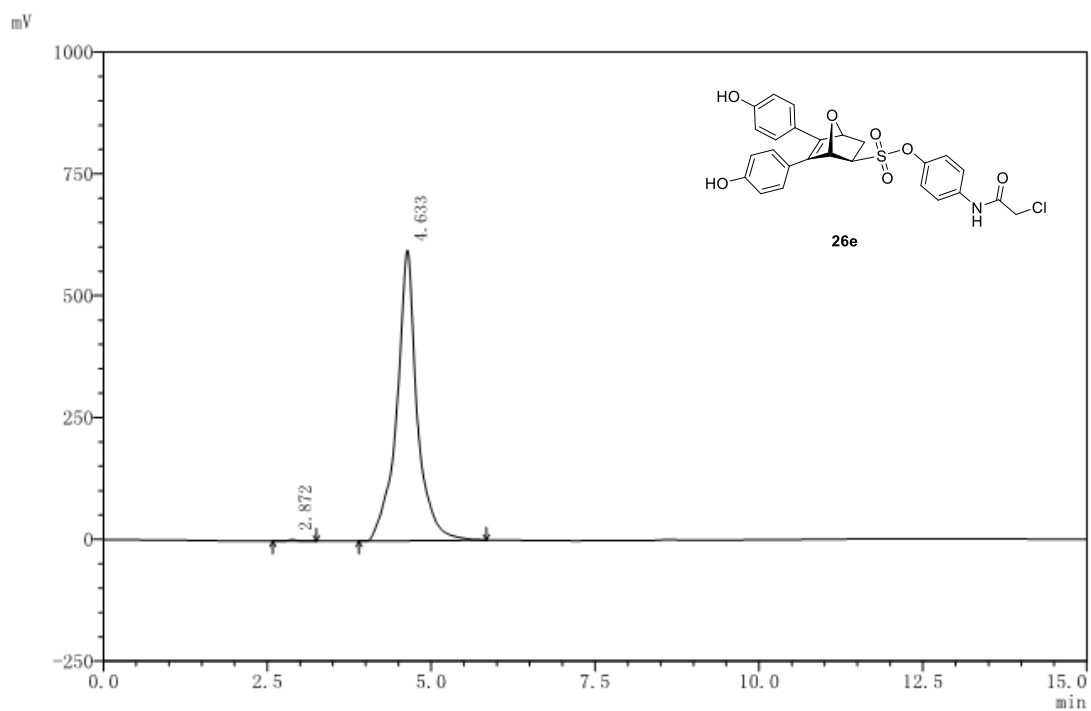



| NO.   | Retention Time | Area     | Percent |
|-------|----------------|----------|---------|
| 1     | 2.872          | 25408    | 0.196   |
| 2     | 4.633          | 12963539 | 99.804  |
| Total |                |          | 100.000 |

HRMS (ESI) calcd for C<sub>26</sub>H<sub>22</sub>ClNO<sub>7</sub>S [M + Na]<sup>+</sup> 550.0698, found 550.0698.

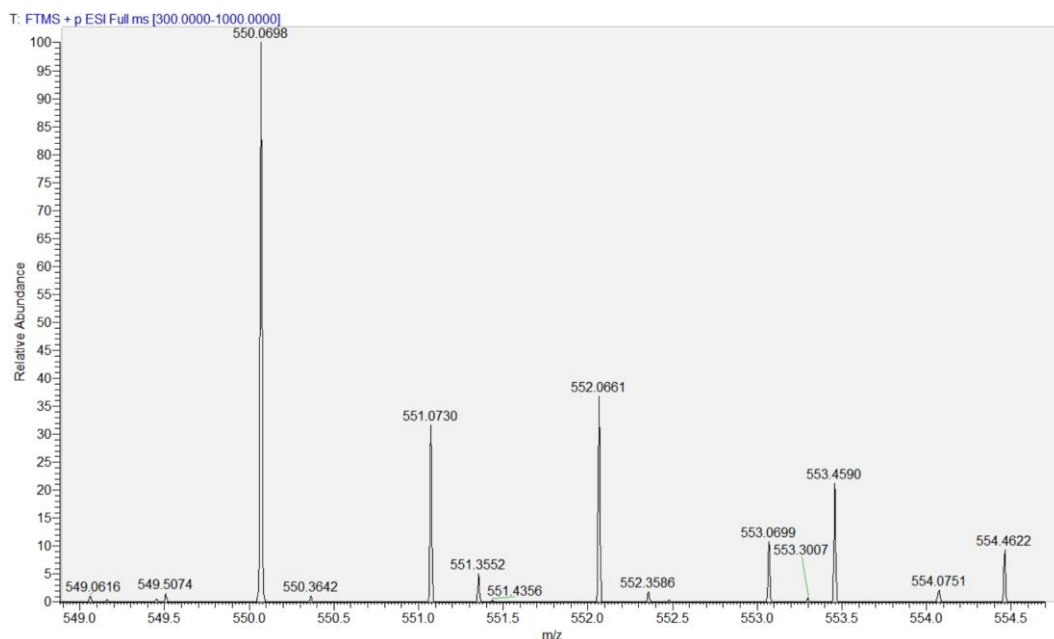

HPLC chromatogram of **26f**. Reverse Phase (Method 90:10 CH<sub>3</sub>OH: H<sub>2</sub>O, Flow rate 0.7 mL/min).

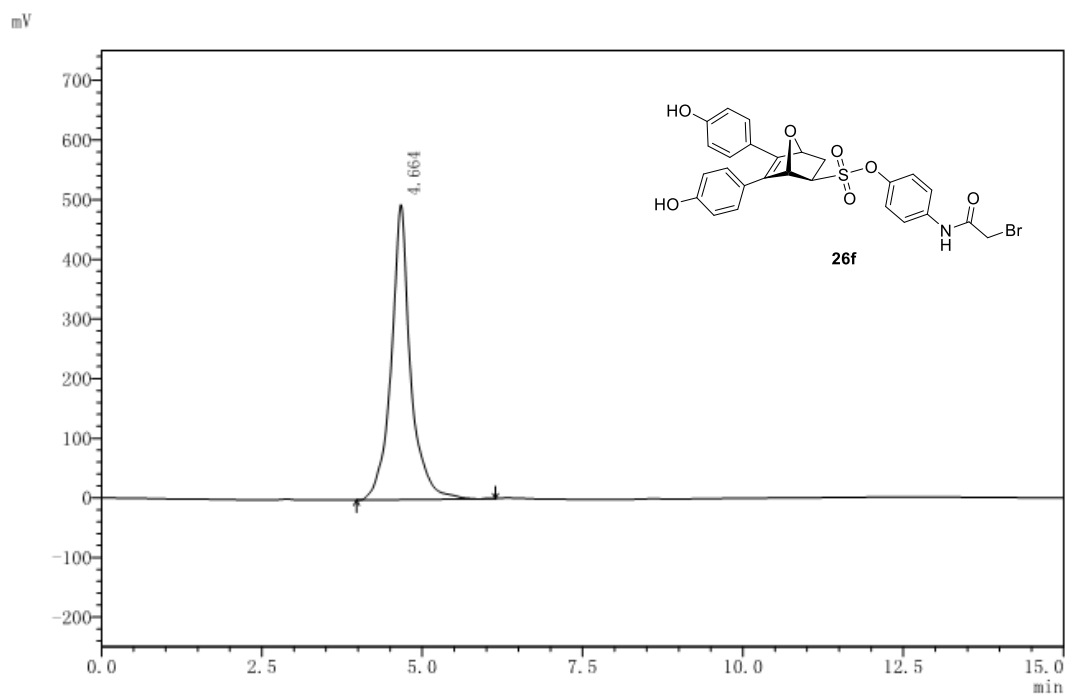

| NO.   | Retention Time | Area     | Percent |
|-------|----------------|----------|---------|
| 1     | 4.664          | 10376805 | 100.000 |
| Total |                |          | 100.000 |

HRMS (ESI) calcd for  $C_{26}H_{22}BrNO_7S [M + Na]^+$  594.1573, found 594.1578.

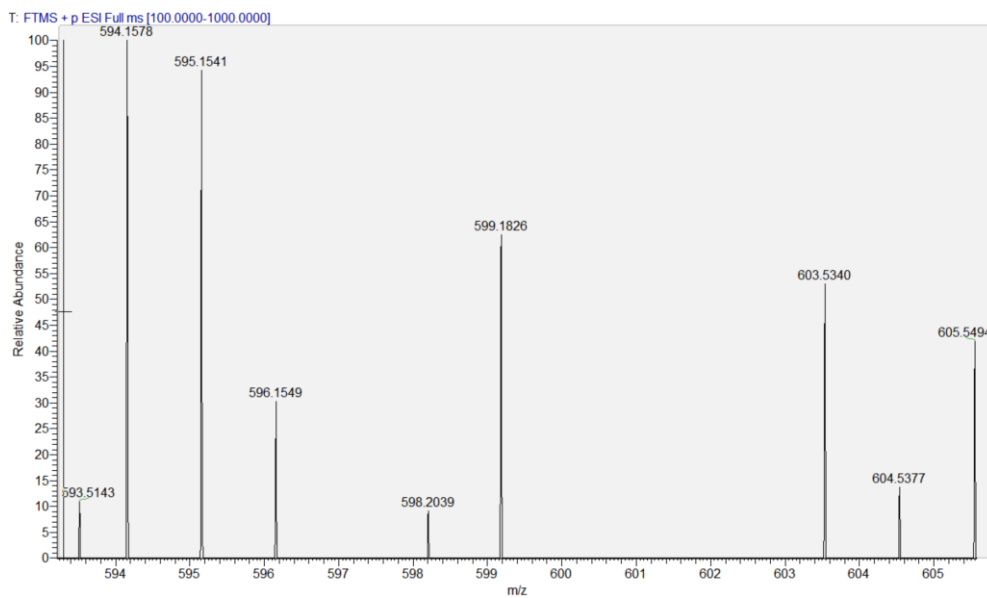

HPLC chromatogram of **28a**. Reverse Phase (Method 80:20  $CH_3OH$ :  $H_2O$ , Flow rate 1.0 mL/min).

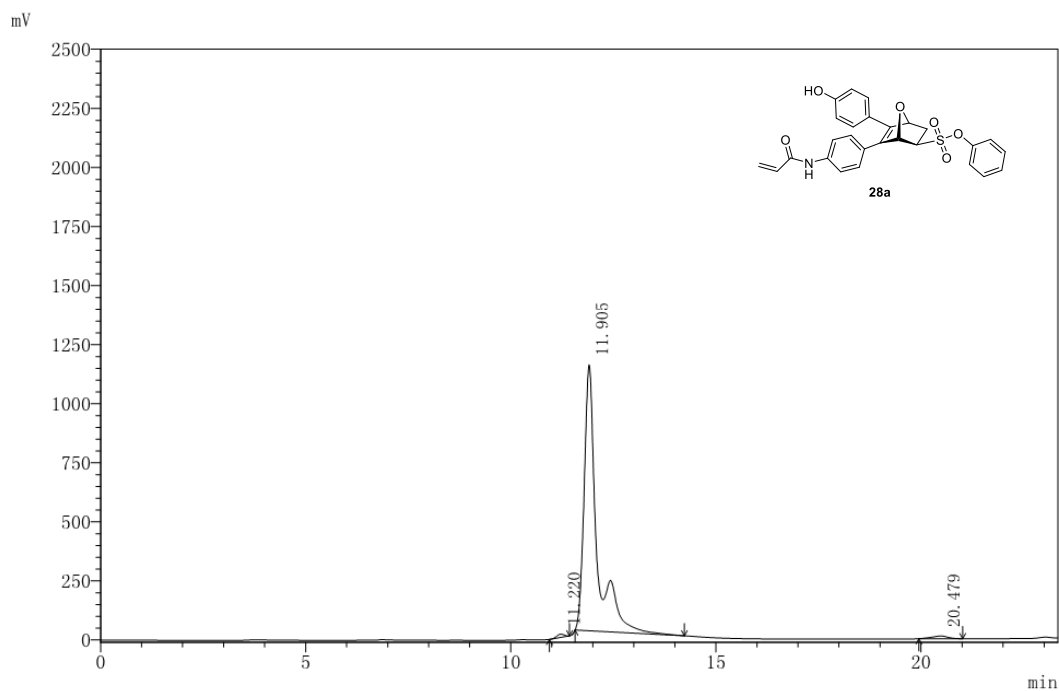

| NO.   | Retention Time | Area     | Percent |
|-------|----------------|----------|---------|
| 1     | 10.220         | 178559   | 0.716   |
| 2     | 11.905         | 24447747 | 98.077  |
| 3     | 20.479         | 300792   | 1.207   |
| Total |                |          | 100.000 |

HRMS (ESI) calcd for  $C_{27}H_{23}NO_6S$   $[M + Na]^+$  513.1367, found 513.1363.

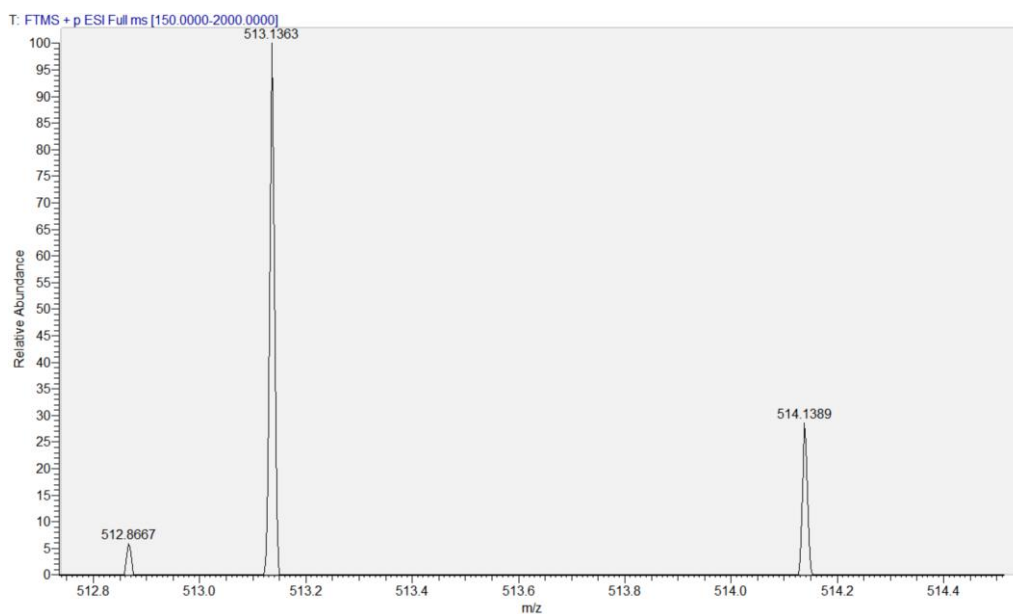

HPLC chromatogram of **28b**. Reverse Phase (Method 80:20 CH<sub>3</sub>OH: H<sub>2</sub>O, Flow rate 1.0 mL/min).

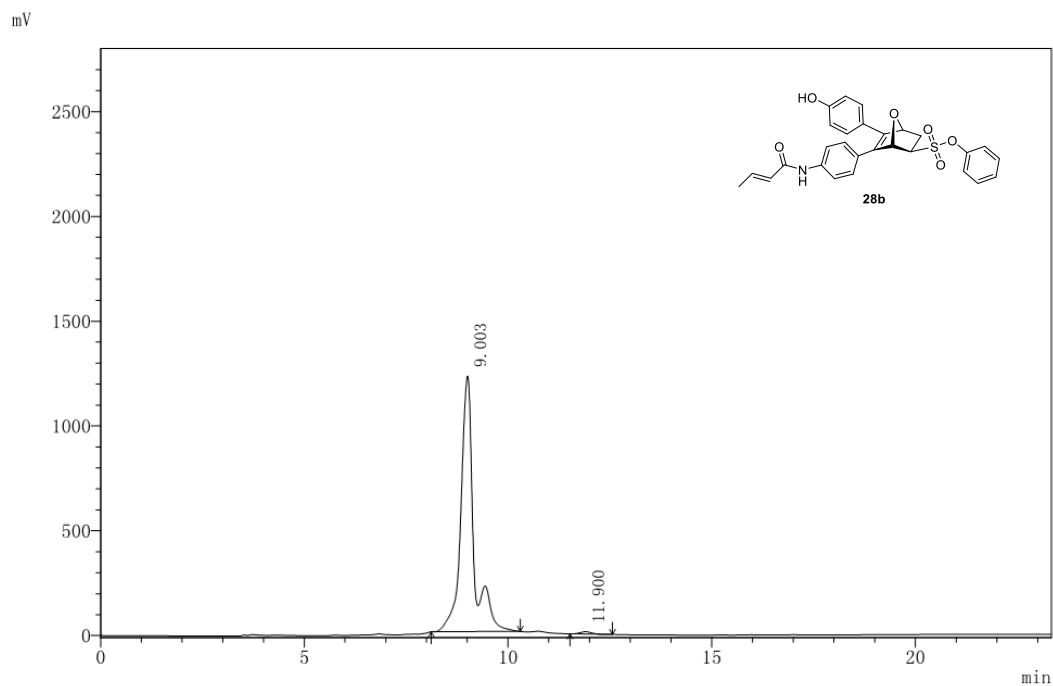

| NO.   | Retention Time | Area     | Percent |
|-------|----------------|----------|---------|
| 1     | 9.003          | 26905238 | 99.154  |
| 2     | 11.900         | 229425   | 0.846   |
| Total |                |          | 100.000 |

HRMS (ESI) calcd for C<sub>28</sub>H<sub>25</sub>NO<sub>6</sub>S [M + Na]<sup>+</sup> 526.1294, found 526.1296.

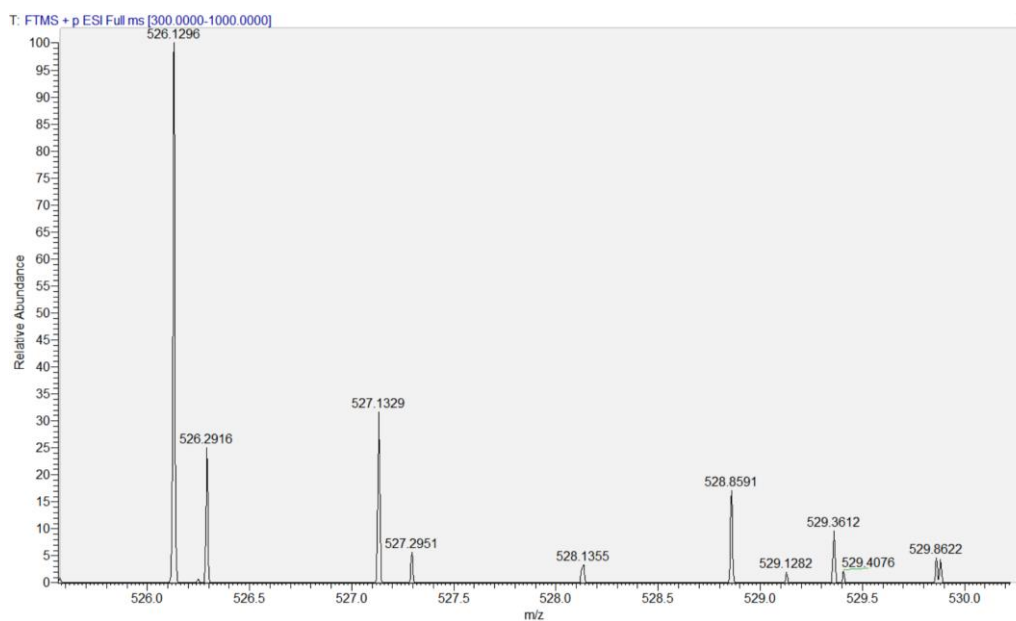

HPLC chromatogram of **28c**. Reverse Phase (Method 80:20 CH<sub>3</sub>OH: H<sub>2</sub>O, Flow rate 1.0 mL/min).

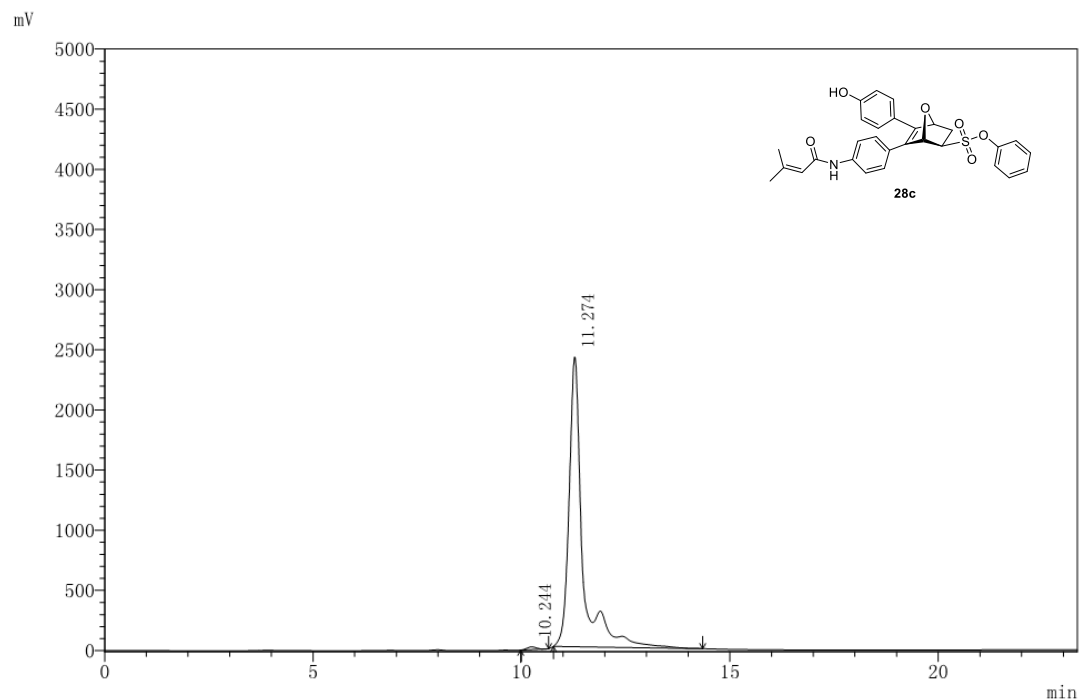

| NO.   | Retention Time | Area     | Percent |
|-------|----------------|----------|---------|
| 1     | 10.244         | 307021   | 0.557   |
| 2     | 11.274         | 54819112 | 99.443  |
| Total |                |          | 100.000 |

HRMS (ESI) calcd for C<sub>29</sub>H<sub>27</sub>NO<sub>6</sub>S [M + Na]<sup>+</sup> 540.1451, found 540.1452.

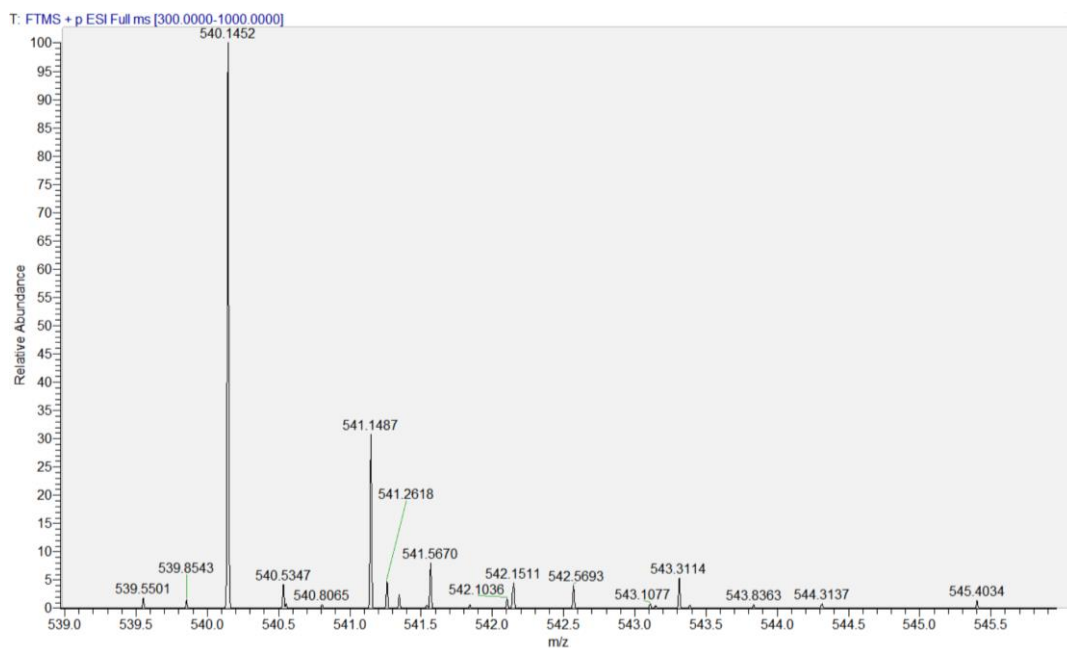

HPLC chromatogram of **28d**. Reverse Phase (Method 80:20 CH<sub>3</sub>OH: H<sub>2</sub>O, Flow rate 1.0 mL/min).

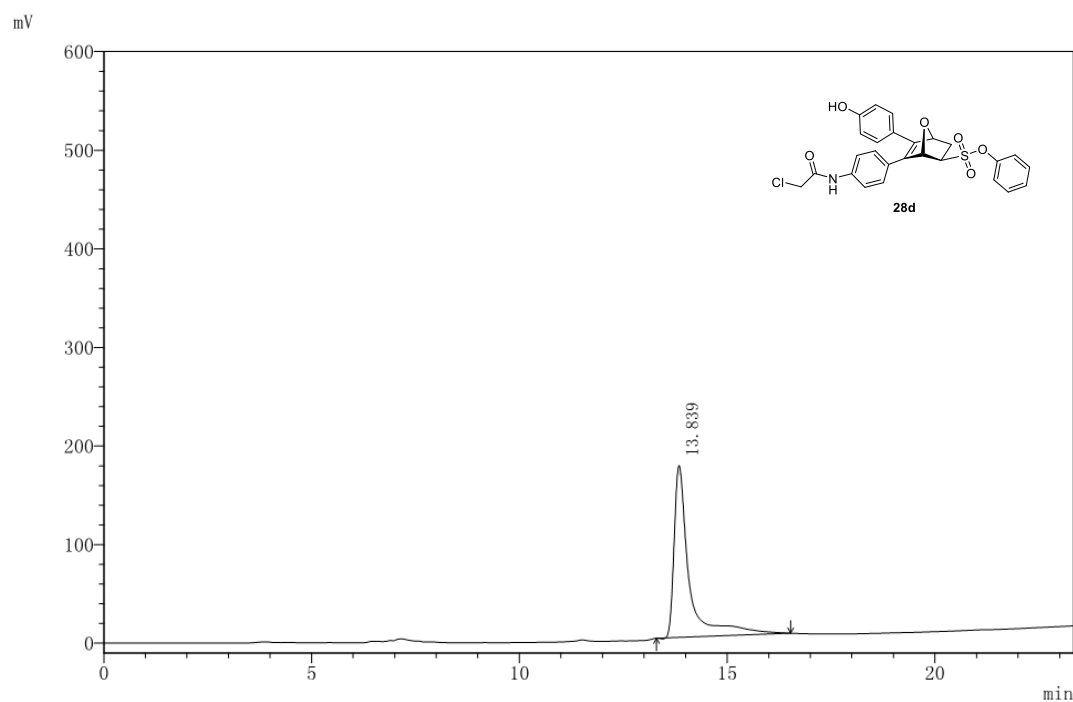

| NO.   | Retention Time | Area    | Percent |
|-------|----------------|---------|---------|
| 1     | 13.839         | 4431856 | 100.000 |
| Total |                |         | 100.000 |

HRMS (ESI) calcd for C<sub>26</sub>H<sub>22</sub>ClNO<sub>6</sub>S [M + H]<sup>+</sup> 512.0923, found 512.0926.

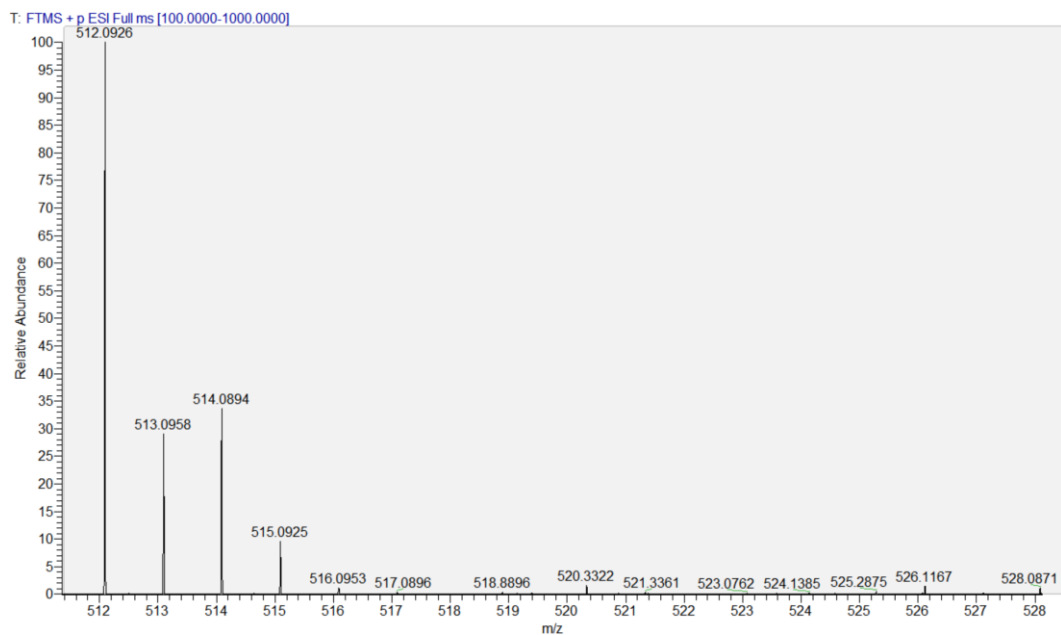

HPLC chromatogram of **28e**. Reverse Phase (Method 80:20 CH<sub>3</sub>OH: H<sub>2</sub>O, Flow rate 1.0 mL/min).

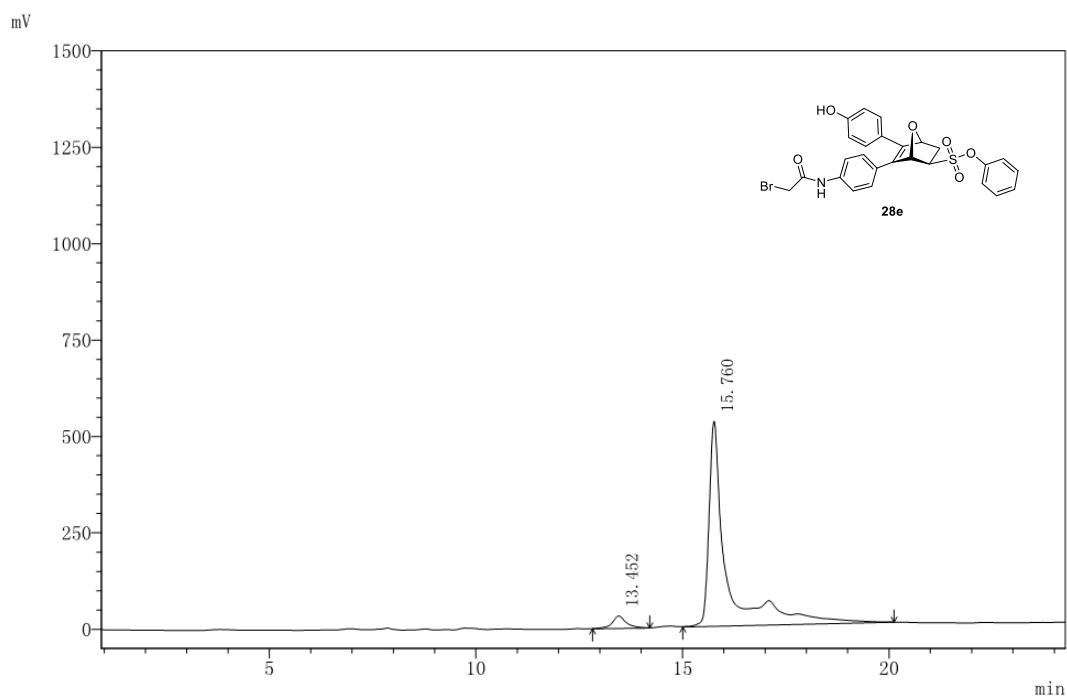

| NO.   | Retention Time | Area     | Percent |
|-------|----------------|----------|---------|
| 1     | 13.452         | 790490   | 4.677   |
| 2     | 15.760         | 16111732 | 95.323  |
| Total |                |          | 100.000 |

HRMS (ESI) calcd for C<sub>26</sub>H<sub>22</sub>BrNO<sub>6</sub>S [M + H]<sup>+</sup> 556.0423, found 556.0418.

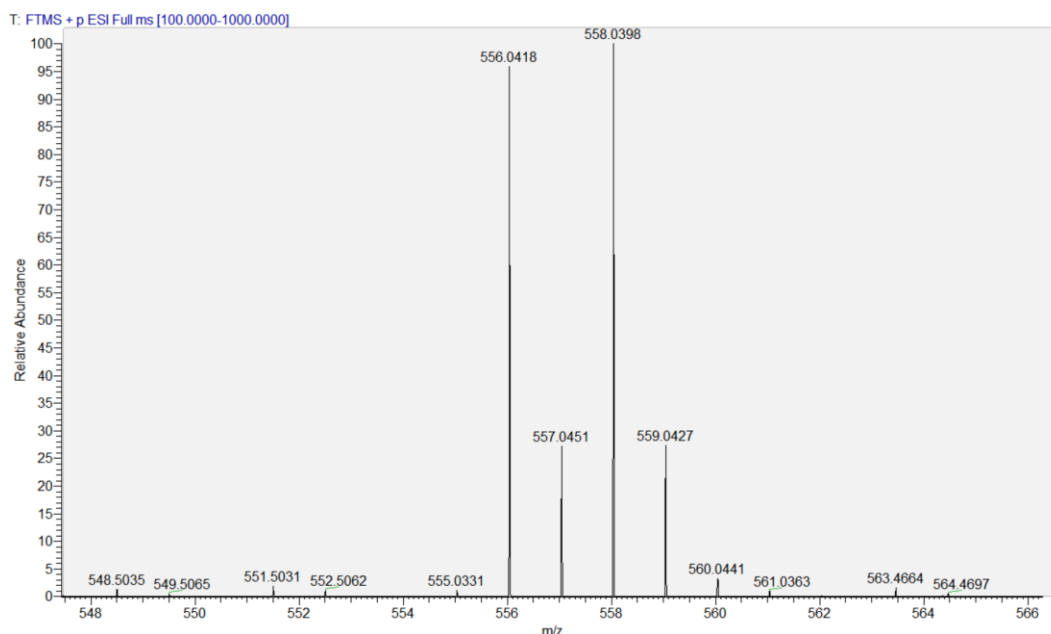

HPLC chromatogram of **28f**. Reverse Phase (Method 80:20 CH<sub>3</sub>OH: H<sub>2</sub>O, Flow rate 1.0 mL/min).

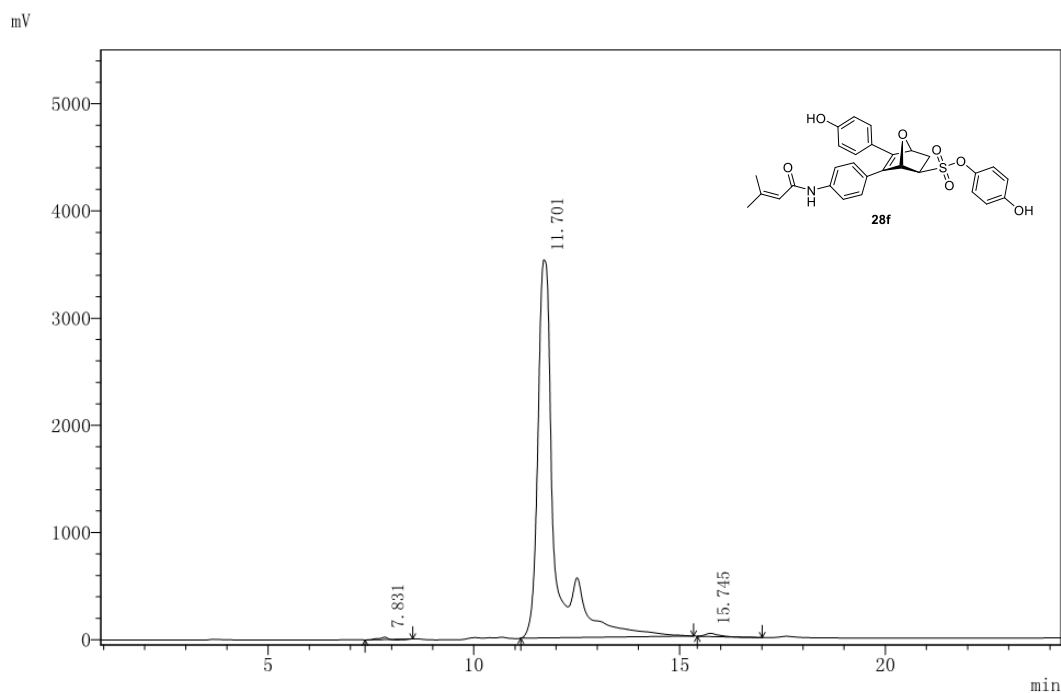

| NO. | Retention Time | Area      | Percent |
|-----|----------------|-----------|---------|
| 1   | 7.831          | 153399    | 0.151   |
| 2   | 11.701         | 101000162 | 99.286  |
| 3   | 15.745         | 573141    | 0.563   |



HRMS (ESI) calcd for C<sub>29</sub>H<sub>27</sub>NO<sub>7</sub>S [M + Na]<sup>+</sup> 556.1400, found 556.1399.

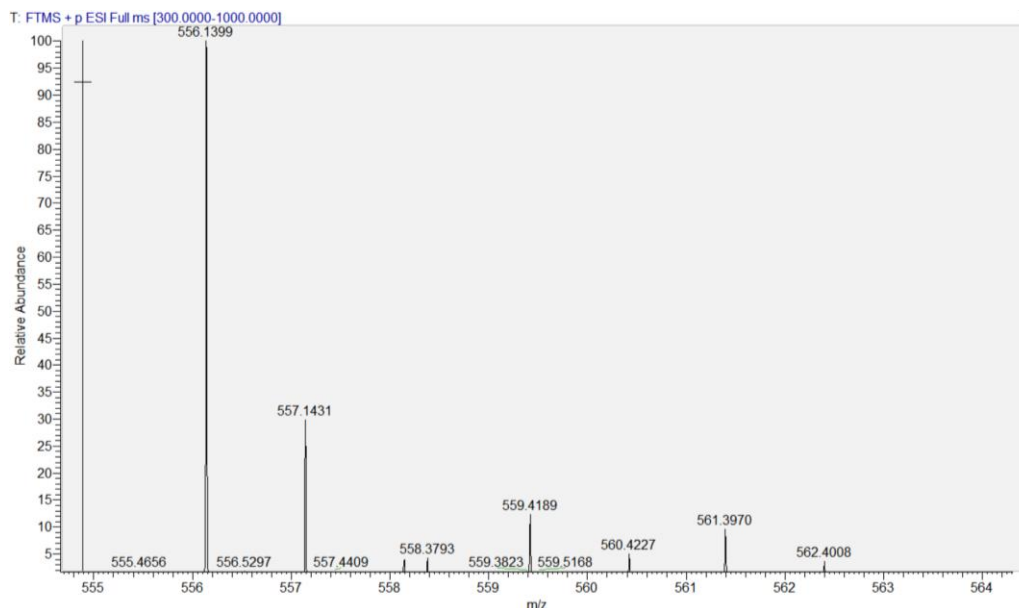

HPLC chromatogram of **29a**. Reverse Phase (Method 80:20 CH<sub>3</sub>OH: H<sub>2</sub>O, Flow rate 1.0 mL/min).

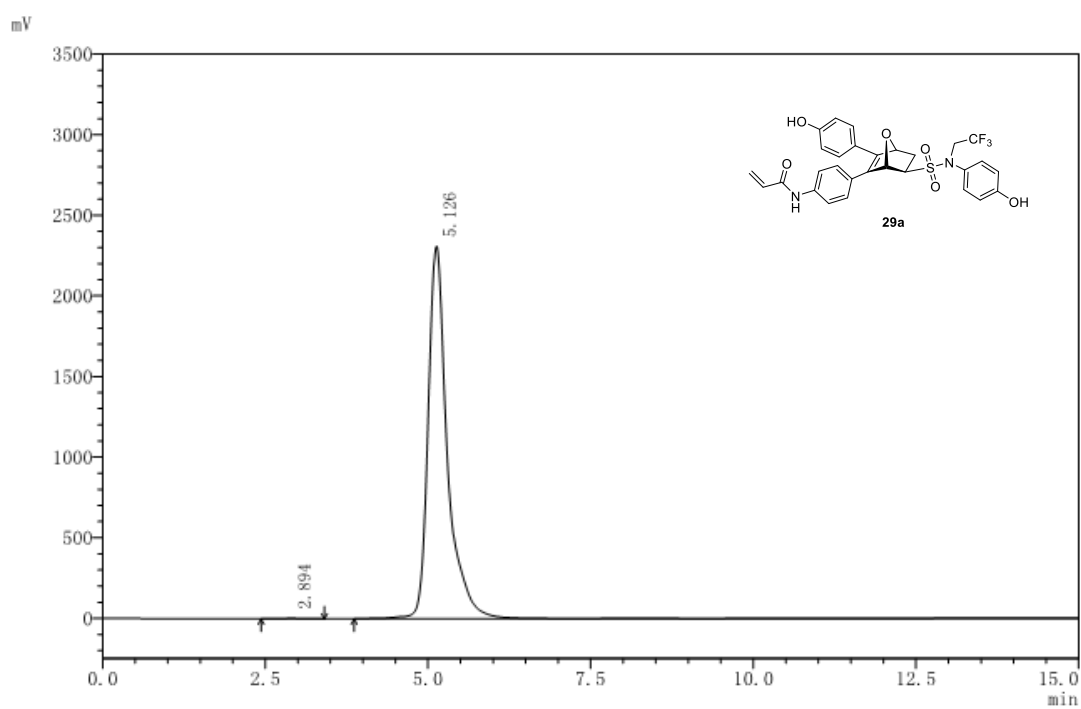

| NO. | Retention Time | Area     | Percent |
|-----|----------------|----------|---------|
| 1   | 2.894          | 63743    | 0.131   |
| 2   | 5.126          | 48538224 | 99.869  |

HRMS (ESI) calcd for C<sub>29</sub>H<sub>25</sub>F<sub>3</sub>N<sub>2</sub>O<sub>6</sub>S [M + H]<sup>+</sup> 587.1458, found 587.1449.

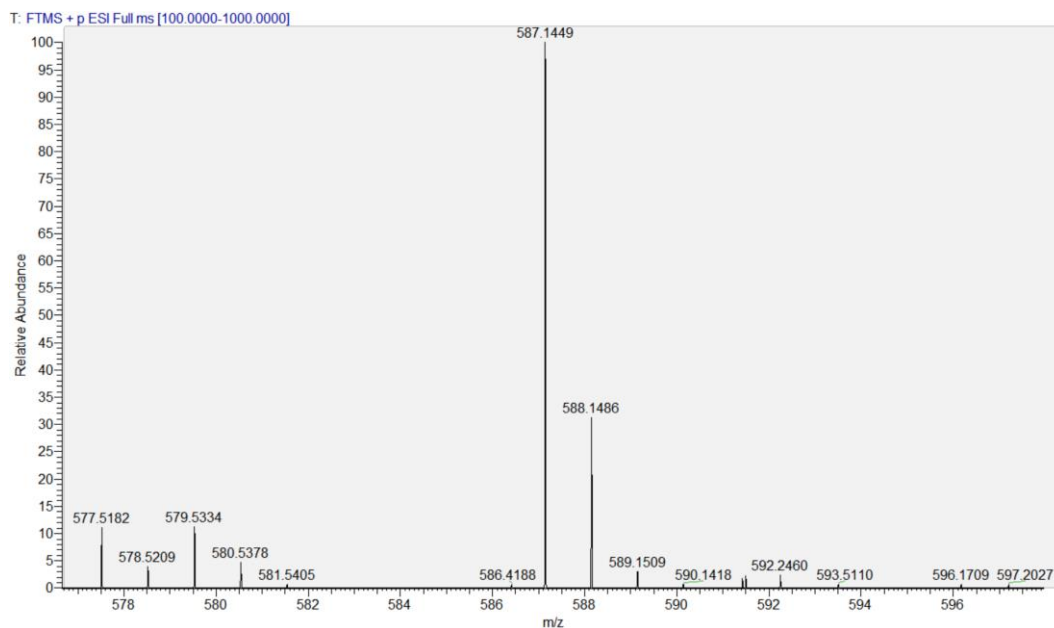

HPLC chromatogram of **29b**. Reverse Phase (Method 90:10 CH<sub>3</sub>OH: H<sub>2</sub>O, Flow rate 0.7 mL/min).

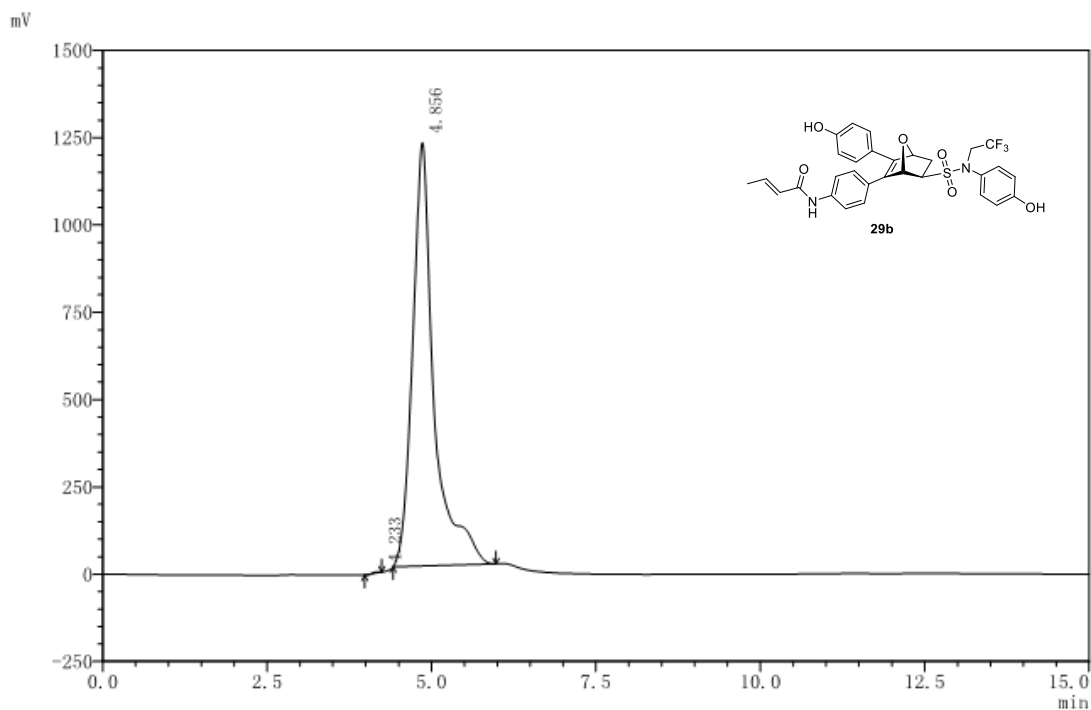

| NO. | Retention Time | Area  | Percent |
|-----|----------------|-------|---------|
| 1   | 4.233          | 15455 | 0.056   |

|       |       |          |         |
|-------|-------|----------|---------|
| 2     | 4.856 | 27366362 | 99.944  |
| Total |       |          | 100.000 |

HRMS (ESI) calcd for C<sub>30</sub>H<sub>27</sub>F<sub>3</sub>N<sub>2</sub>O<sub>6</sub>S [M + Na]<sup>+</sup> 623.1431, found 623.1434.

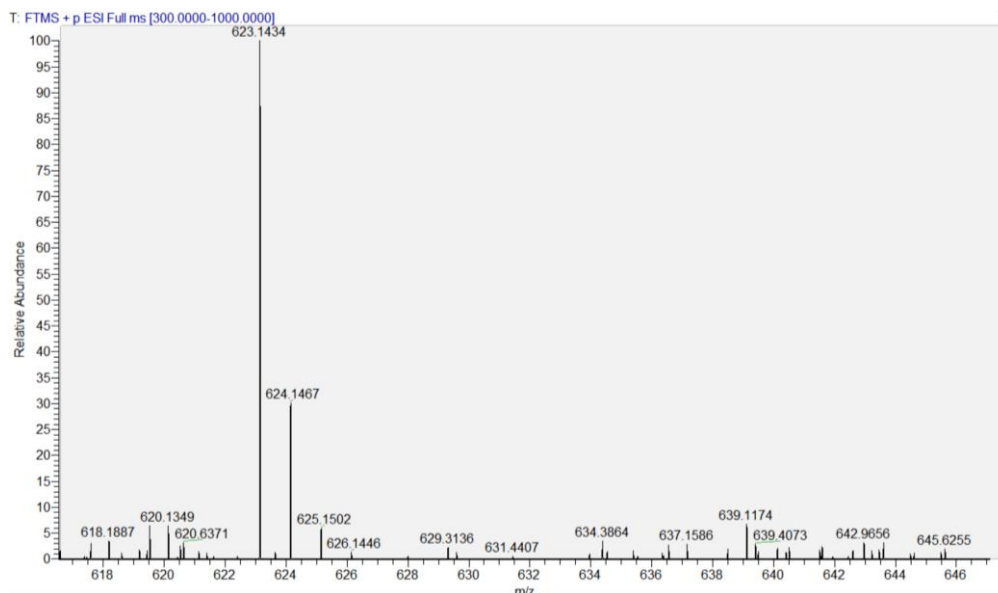

HPLC chromatogram of **29c**. Reverse Phase (Method 90:10 CH<sub>3</sub>OH: H<sub>2</sub>O, Flow rate 0.7 mL/min).

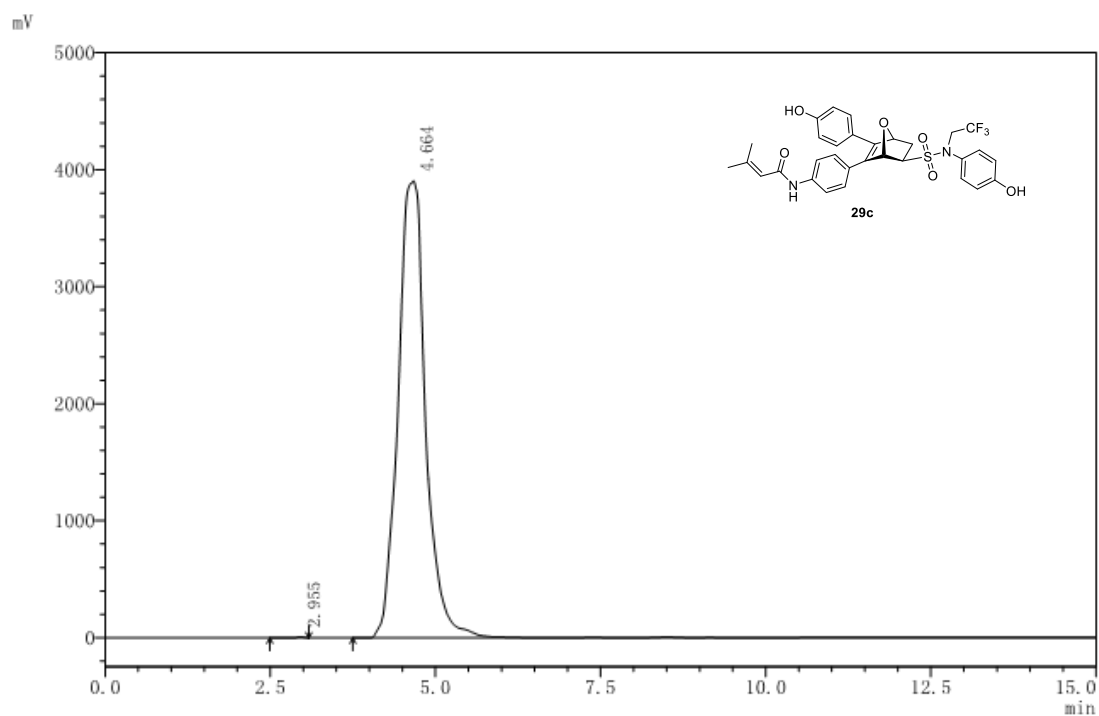

| NO. | Retention Time | Area | Percent |
|-----|----------------|------|---------|
|-----|----------------|------|---------|

|       |       |           |         |
|-------|-------|-----------|---------|
| 1     | 2.955 | 97216     | 0.085   |
| 2     | 4.664 | 114591504 | 99.915  |
| Total |       |           | 100.000 |

HRMS (ESI) calcd for C<sub>31</sub>H<sub>29</sub>F<sub>3</sub>N<sub>2</sub>O<sub>6</sub>S [M + Na]<sup>+</sup> 637.1590, found 637.1592.

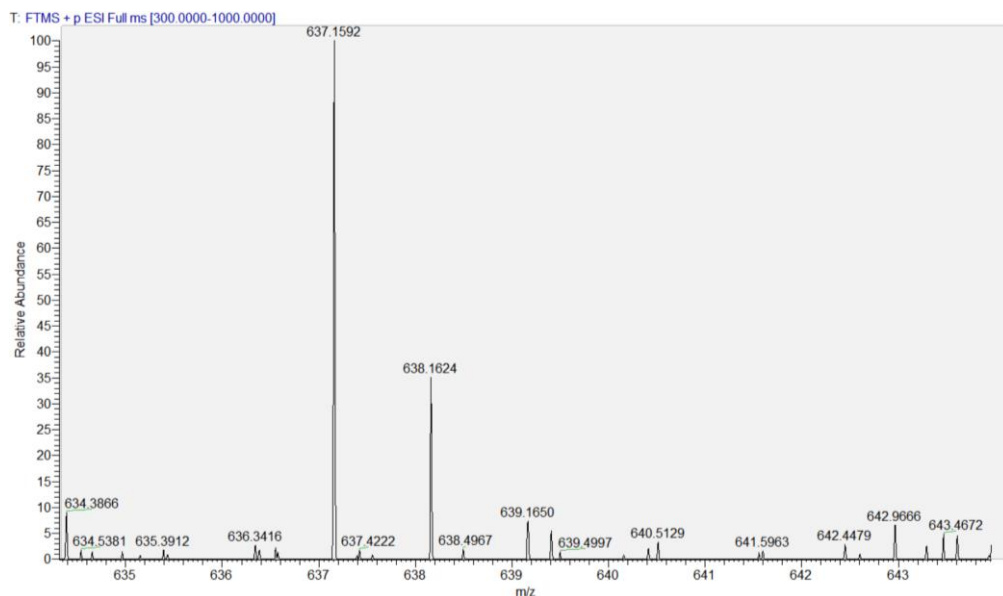

HPLC chromatogram of **29c'**. Reverse Phase (Method 90:10 CH<sub>3</sub>OH: H<sub>2</sub>O, Flow rate 0.7 mL/min).

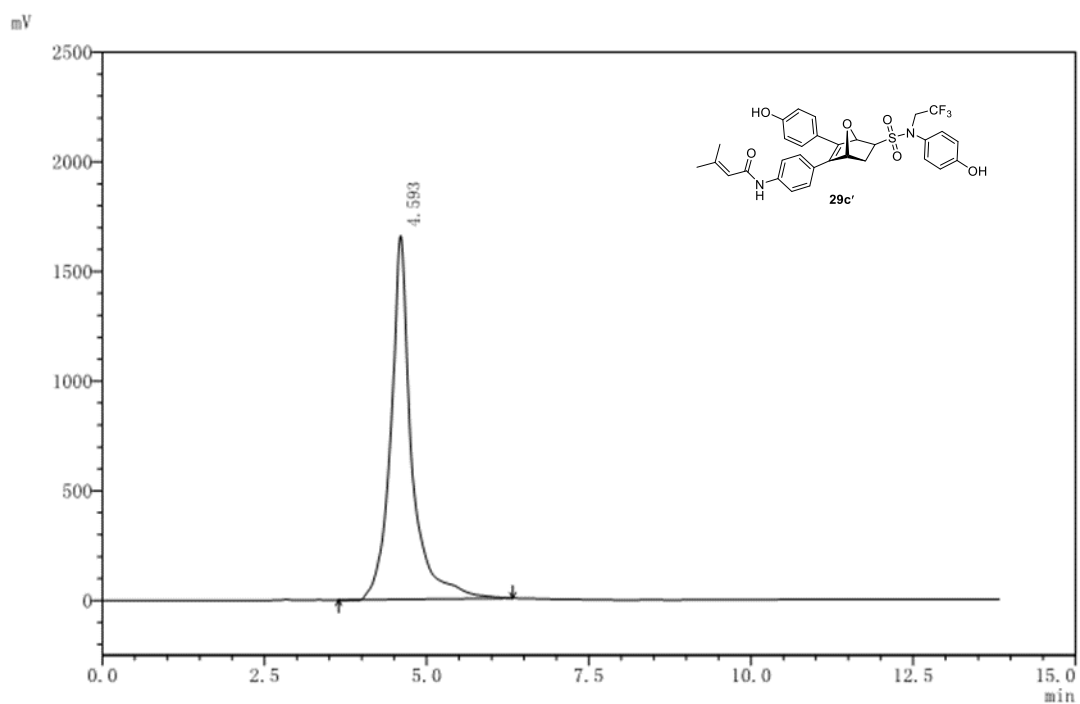

| NO.   | Retention Time | Area     | Percent |
|-------|----------------|----------|---------|
| 1     | 4.593          | 37073514 | 100.000 |
| Total |                |          | 100.000 |

HRMS (ESI) calcd for  $C_{31}H_{29}F_3N_2O_6S [M + H]^+$  615.1771, found 615.1765.

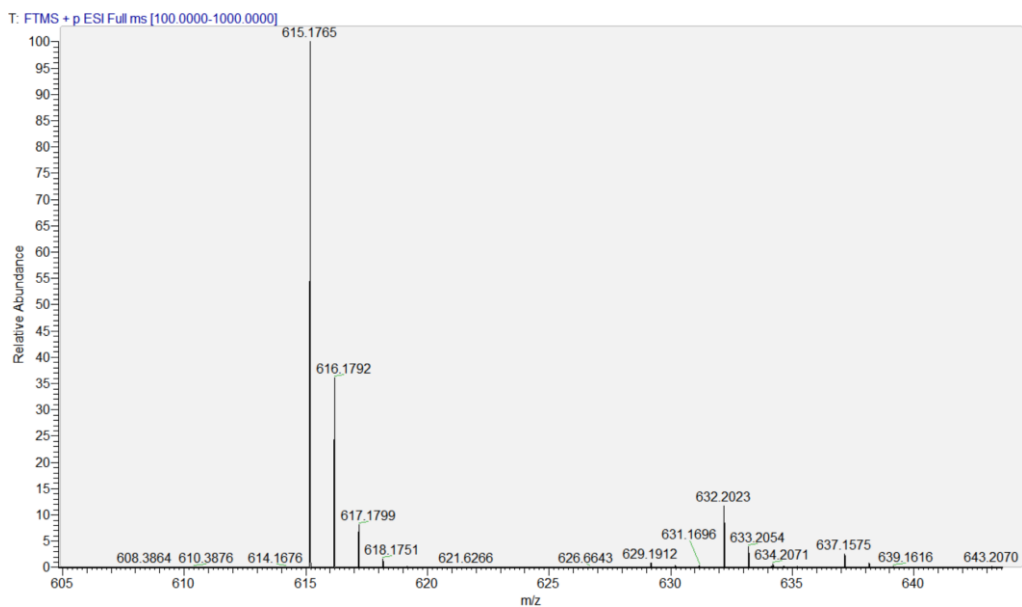

HPLC chromatogram of **29d**. Reverse Phase (Method 90:10  $CH_3OH$ :  $H_2O$ , Flow rate 0.7 mL/min).

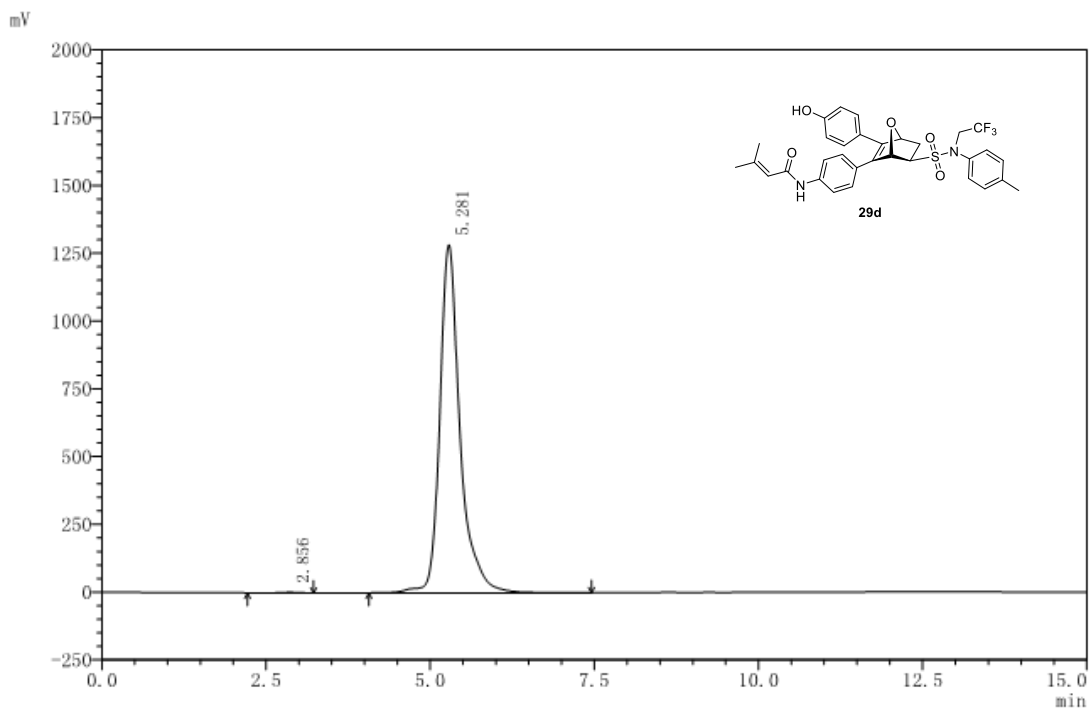

| NO.   | Retention Time | Area     | Percent |
|-------|----------------|----------|---------|
| 1     | 2.856          | 31066    | 0.112   |
| 2     | 5.281          | 27693128 | 99.888  |
| Total |                |          | 100.000 |

HRMS (ESI) calcd for  $C_{31}H_{29}F_3N_2O_6S$   $[M + H]^+$  613.1978, found 613.1970.

T: FTMS + p ESI Full ms [100.0000-1000.0000]

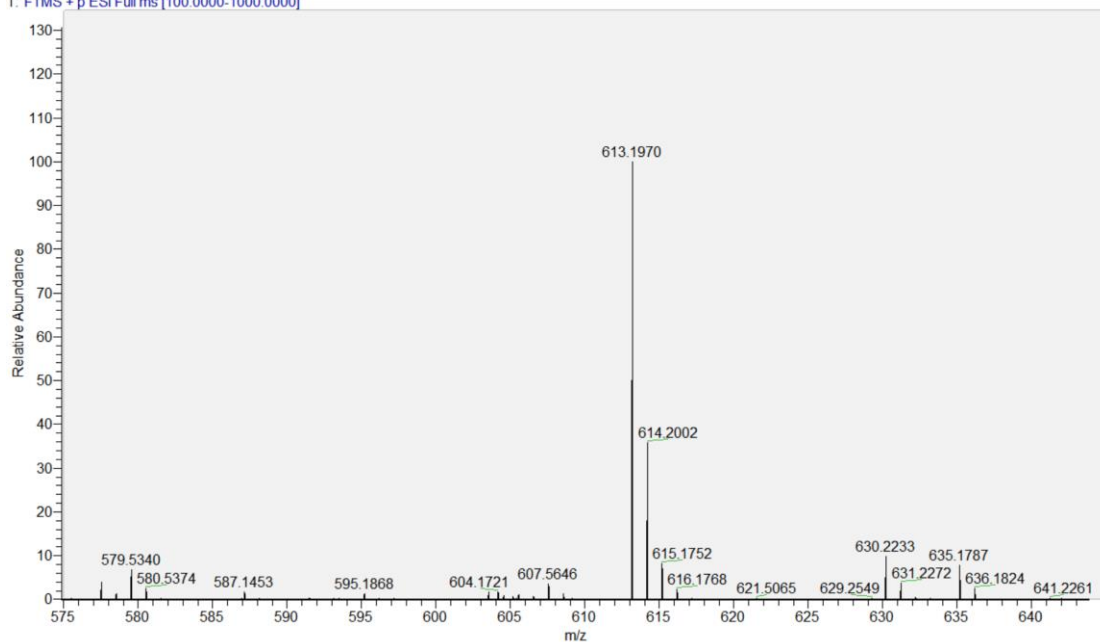

HPLC chromatogram of **29e**. Reverse Phase (Method 90:10  $CH_3OH$ :  $H_2O$ , Flow rate 0.7 mL/min).

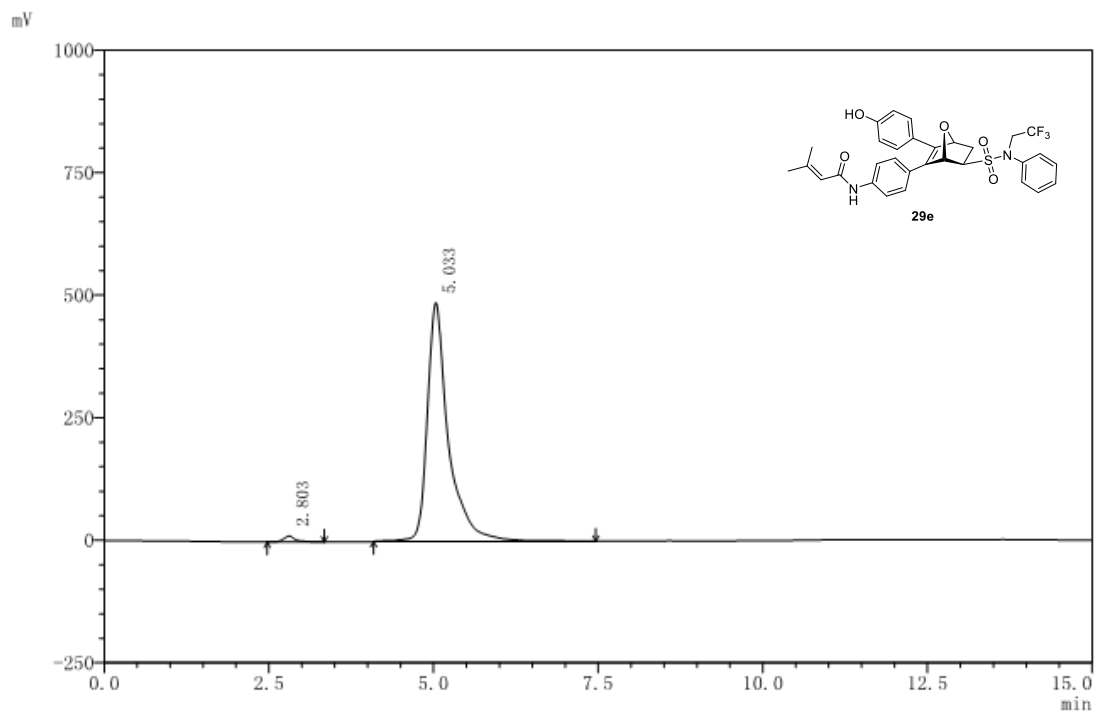

| NO.   | Retention Time | Area     | Percent |
|-------|----------------|----------|---------|
| 1     | 2.803          | 150928   | 1.365   |
| 2     | 5.033          | 10904719 | 98.635  |
| Total |                |          | 100.000 |

HRMS (ESI) calcd for  $C_{31}H_{29}F_3N_2O_5S$   $[M + H]^+$  599.1822, found 599.1818.

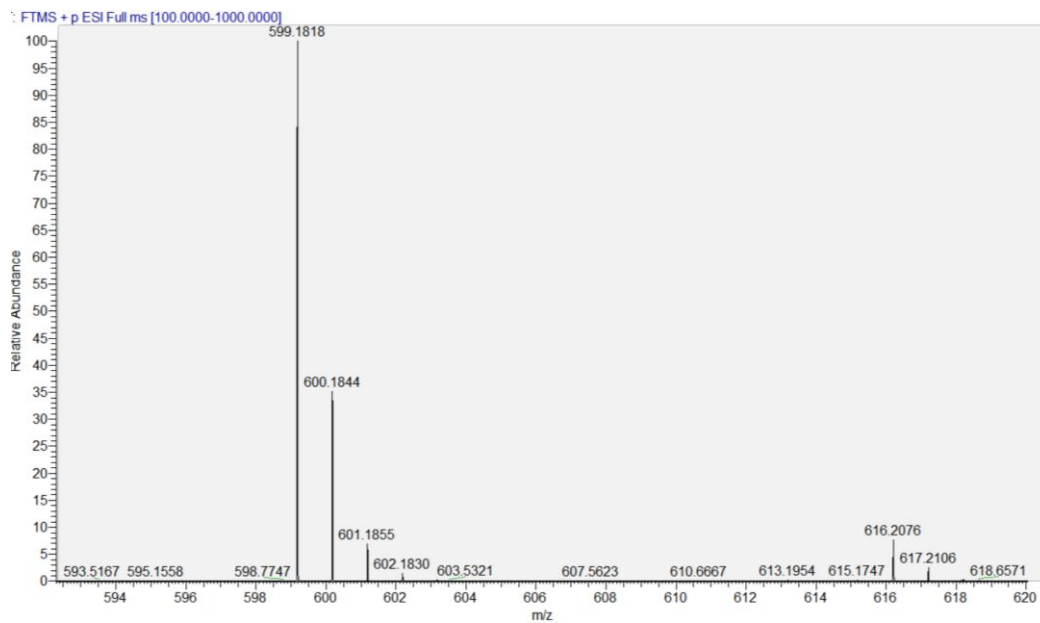

HPLC chromatogram of **29f**. Reverse Phase (Method 90:10  $CH_3OH$ :  $H_2O$ , Flow rate

0.7 mL/min).

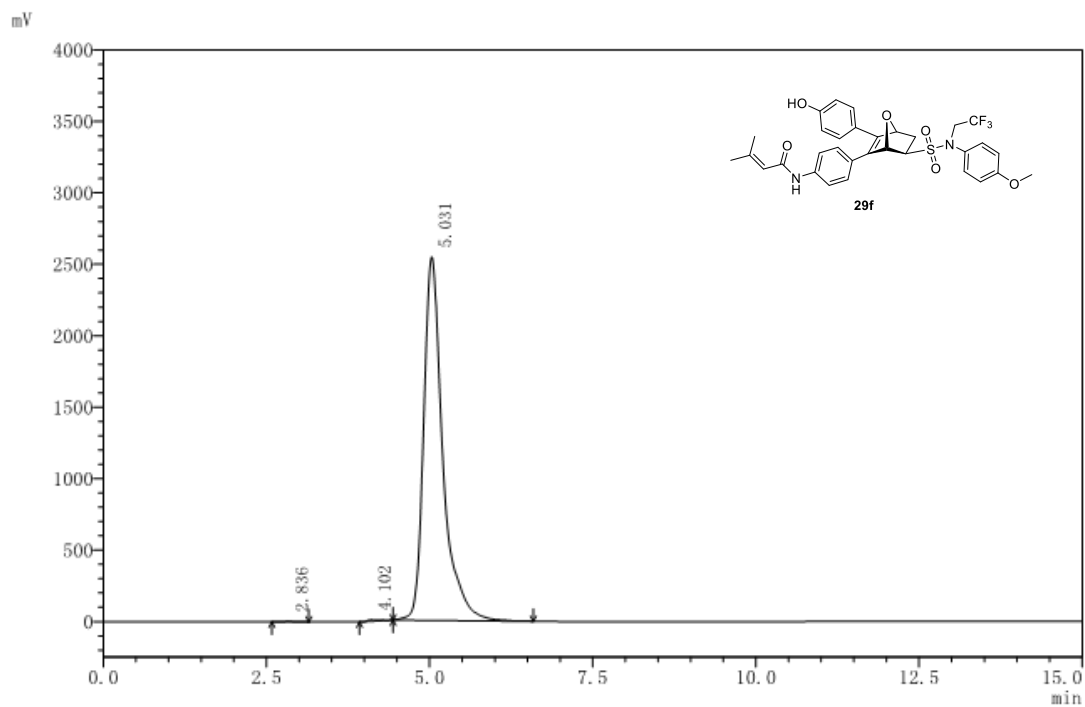

| NO.   | Retention Time | Area     | Percent |
|-------|----------------|----------|---------|
| 1     | 2.836          | 48419    | 0.093   |
| 2     | 4.102          | 93117    | 0.179   |
| 3     | 5.031          | 51943923 | 99.728  |
| Total |                |          | 100.000 |

HRMS (ESI) calcd for  $C_{32}H_{31}F_3N_2O_6S$   $[M + Na]^+$  651.1747, found 651.1750.

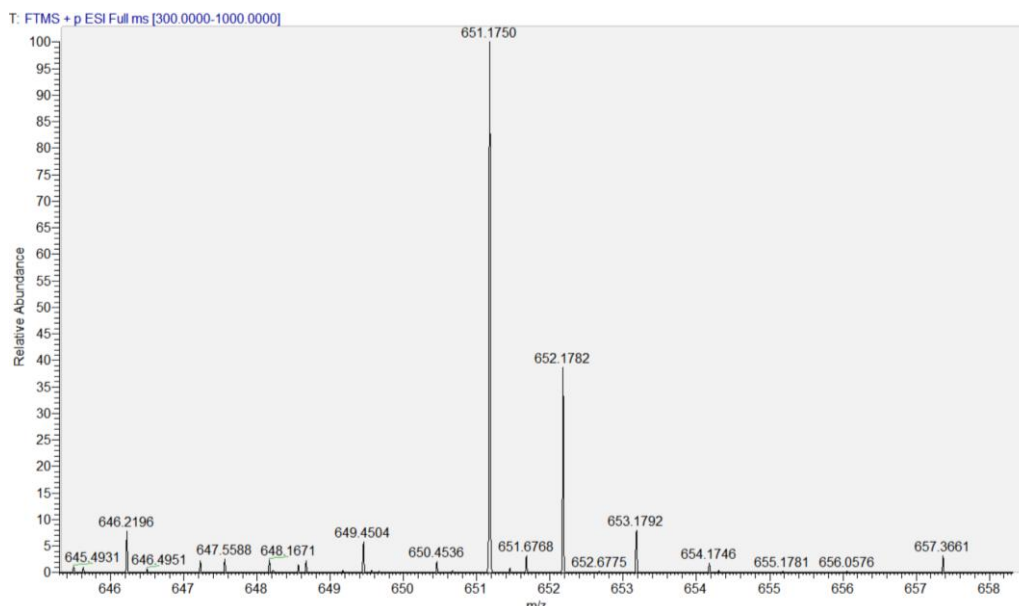



HPLC chromatogram of **29g**. Reverse Phase (Method 90:10 CH<sub>3</sub>OH: H<sub>2</sub>O, Flow rate 0.7 mL/min).

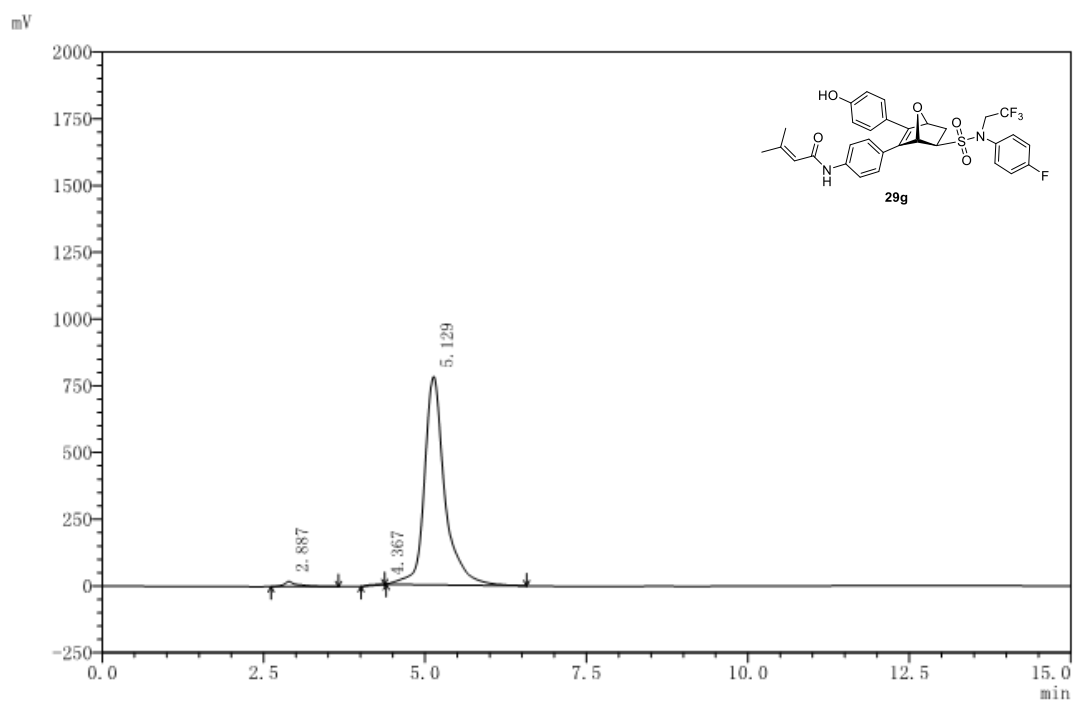

| NO.   | Retention Time | Area     | Percent |
|-------|----------------|----------|---------|
| 1     | 2.887          | 294732   | 1.688   |
| 2     | 4.367          | 39266    | 0.225   |
| 3     | 5.129          | 17124094 | 98.087  |
| Total |                |          | 100.000 |

HRMS (ESI) calcd for C<sub>31</sub>H<sub>28</sub>F<sub>4</sub>N<sub>2</sub>O<sub>5</sub>S [M + H]<sup>+</sup> 617.1727, found 617.1719.

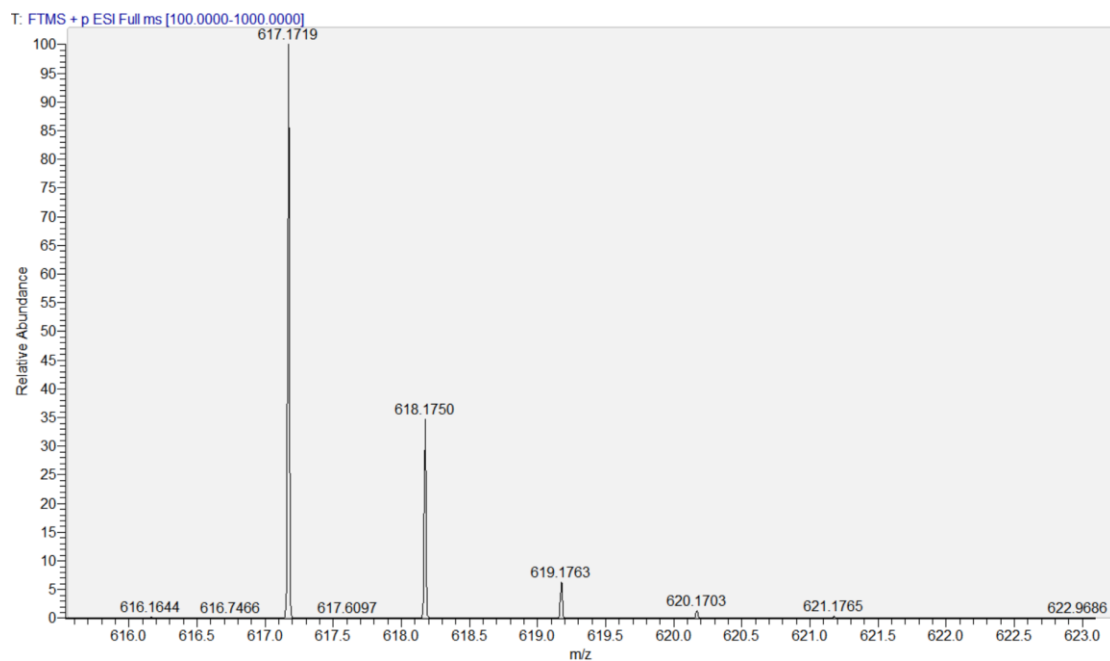

HPLC chromatogram of **29h**. Reverse Phase (Method 90:10 CH<sub>3</sub>OH: H<sub>2</sub>O, Flow rate 0.7 mL/min).

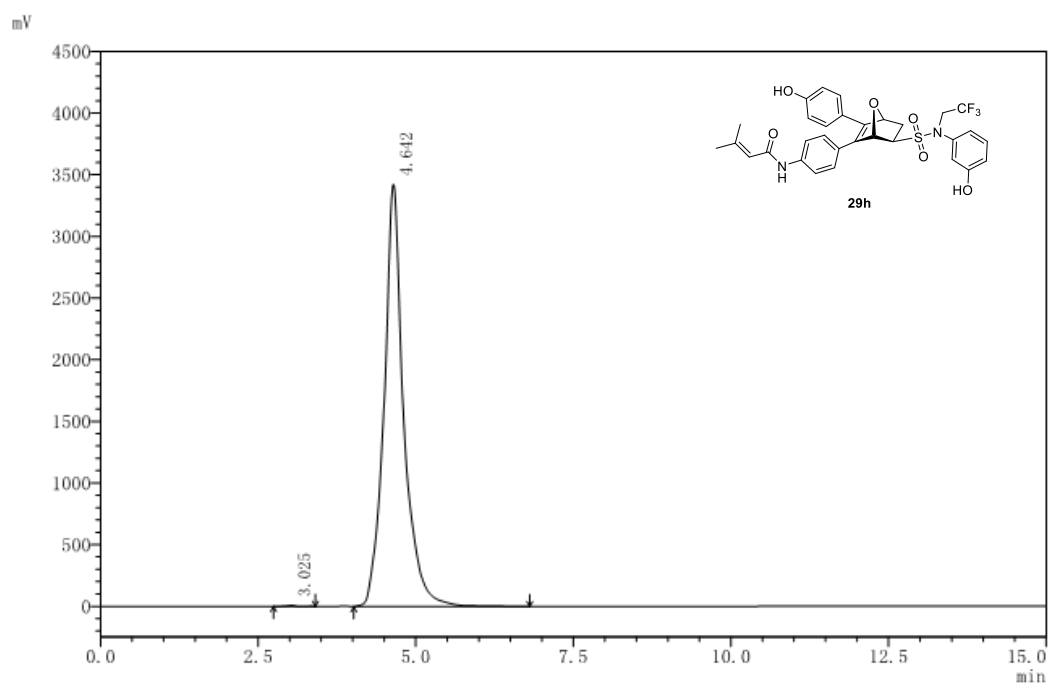

| NO.   | Retention Time | Area     | Percent |
|-------|----------------|----------|---------|
| 1     | 3.025          | 93384    | 0.125   |
| 2     | 4.642          | 74556580 | 99.875  |
| Total |                |          | 100.000 |

HRMS (ESI) calcd for C<sub>31</sub>H<sub>29</sub>F<sub>3</sub>N<sub>2</sub>O<sub>6</sub>S [M + Na]<sup>+</sup> 637.1590, found 637.1594.

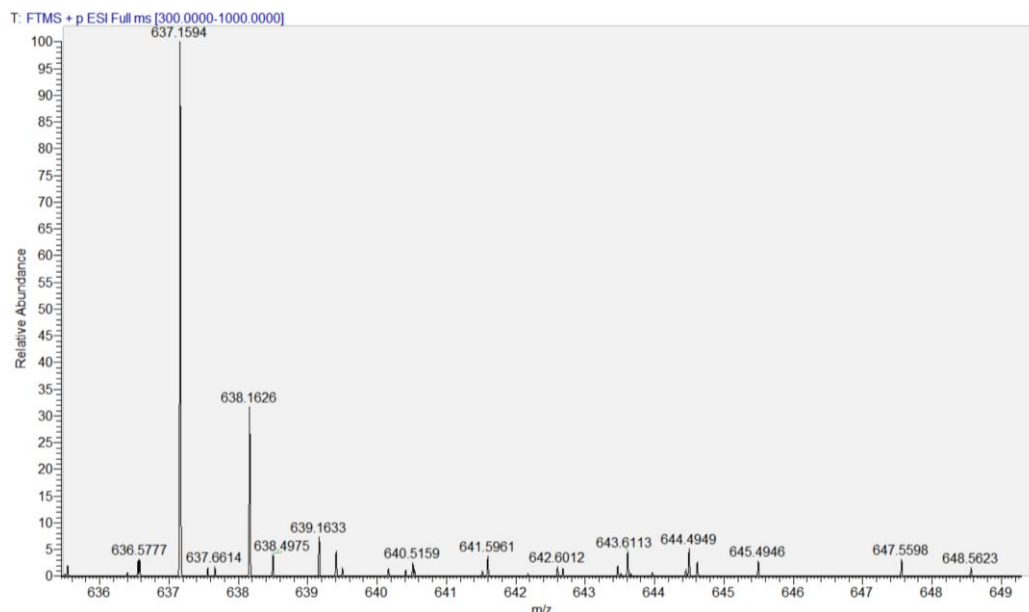

HPLC chromatogram of **29i**. Reverse Phase (Method 90:10 CH<sub>3</sub>OH: H<sub>2</sub>O, Flow rate 0.7 mL/min).

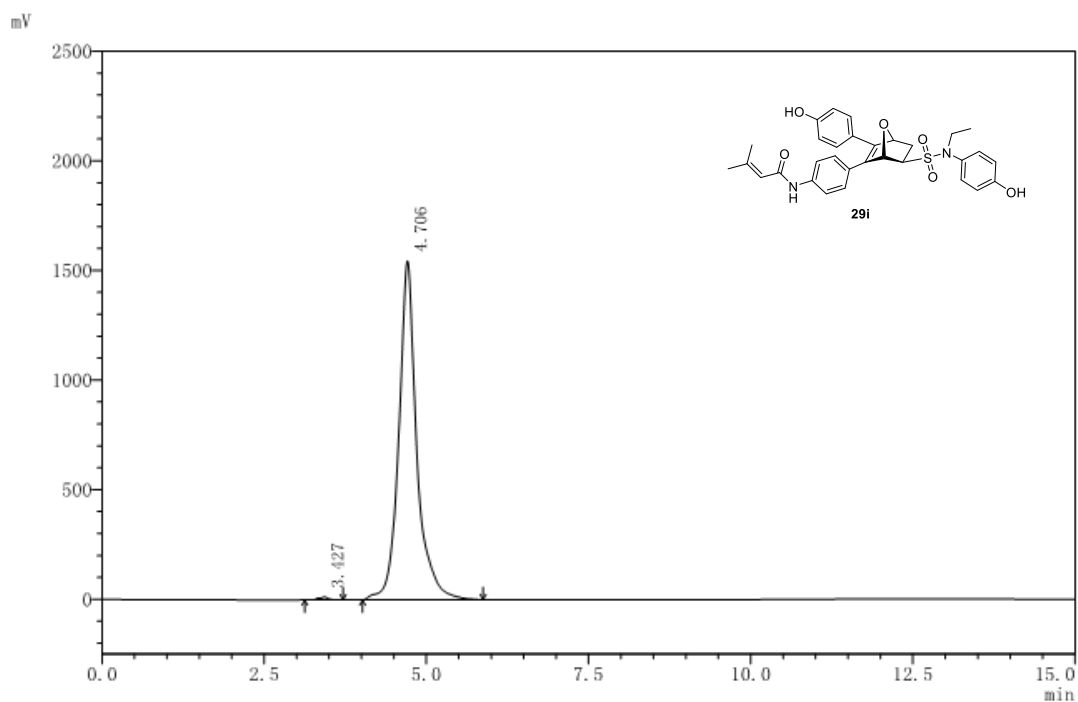

| NO.   | Retention Time | Area     | Percent |
|-------|----------------|----------|---------|
| 1     | 3.427          | 132319   | 0.441   |
| 2     | 4.706          | 29880432 | 99.559  |
| Total |                |          | 100.000 |

HRMS (ESI) calcd for C<sub>31</sub>H<sub>32</sub>N<sub>2</sub>O<sub>6</sub>S [M + Na]<sup>+</sup> 583.1873, found 583.1876.

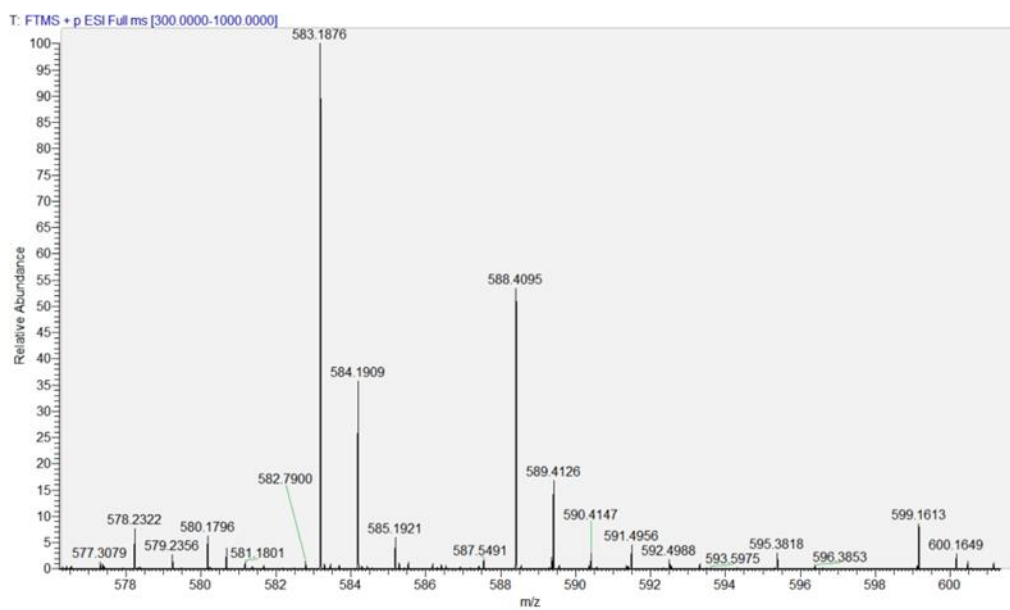

HPLC chromatogram of **29j**. Reverse Phase (Method 90:10 CH<sub>3</sub>OH: H<sub>2</sub>O, Flow rate 0.7 mL/min).

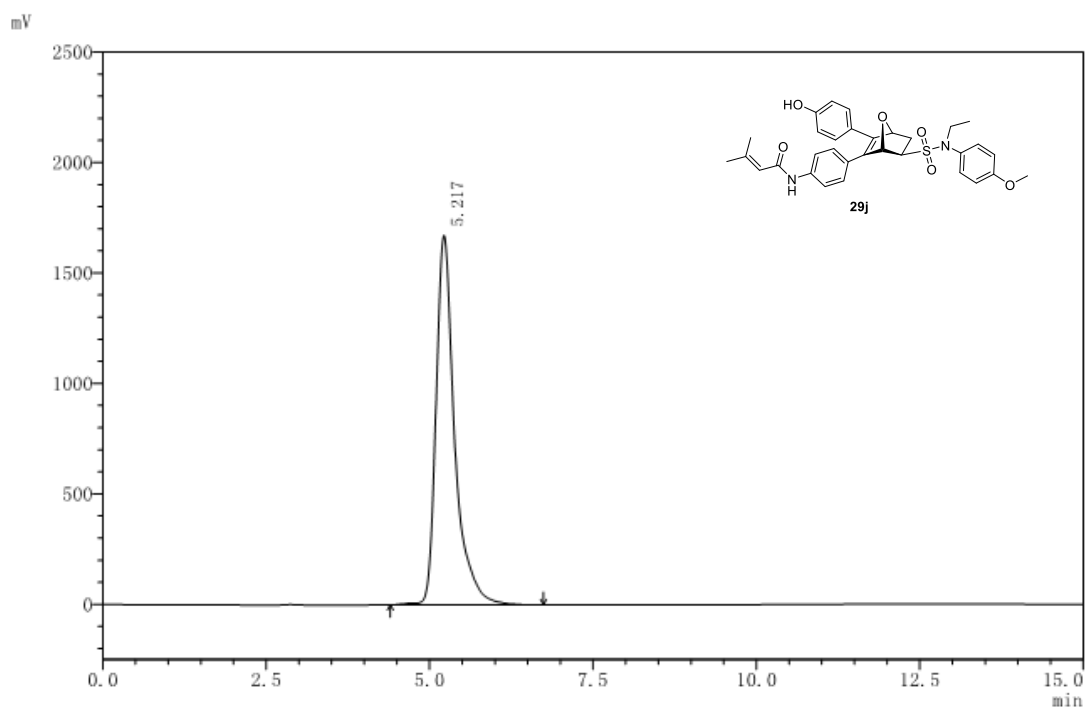

| NO.   | Retention Time | Area     | Percent |
|-------|----------------|----------|---------|
| 1     | 5.217          | 33141916 | 100.000 |
| Total |                |          | 100.000 |

HRMS (ESI) calcd for C<sub>32</sub>H<sub>34</sub>N<sub>2</sub>O<sub>6</sub>S [M + H]<sup>+</sup> 575.2210, found 575.2205.

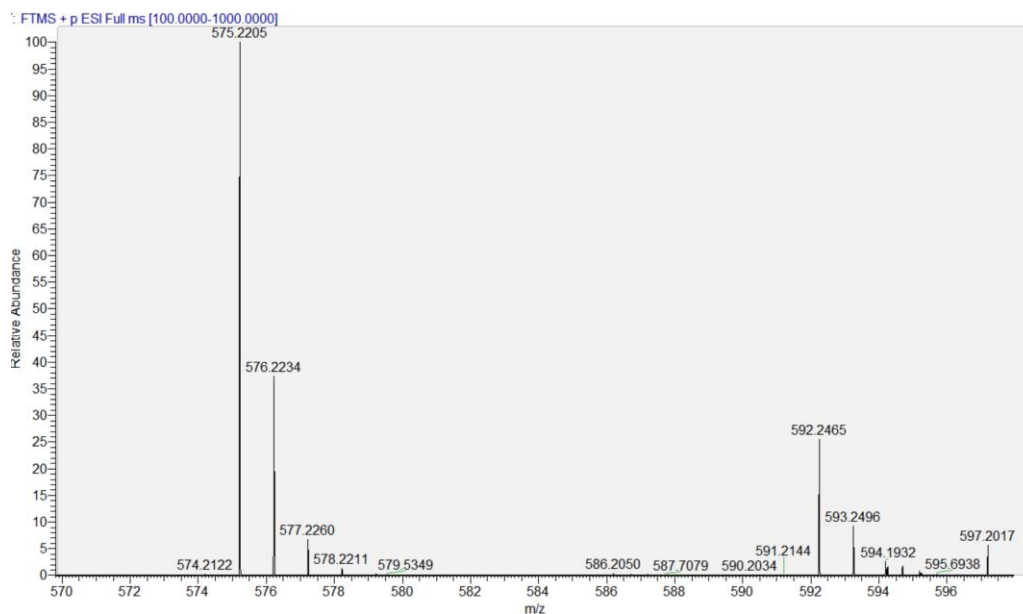

HPLC chromatogram of **29k**. Reverse Phase (Method 90:10 CH<sub>3</sub>OH: H<sub>2</sub>O, Flow rate 0.7 mL/min).

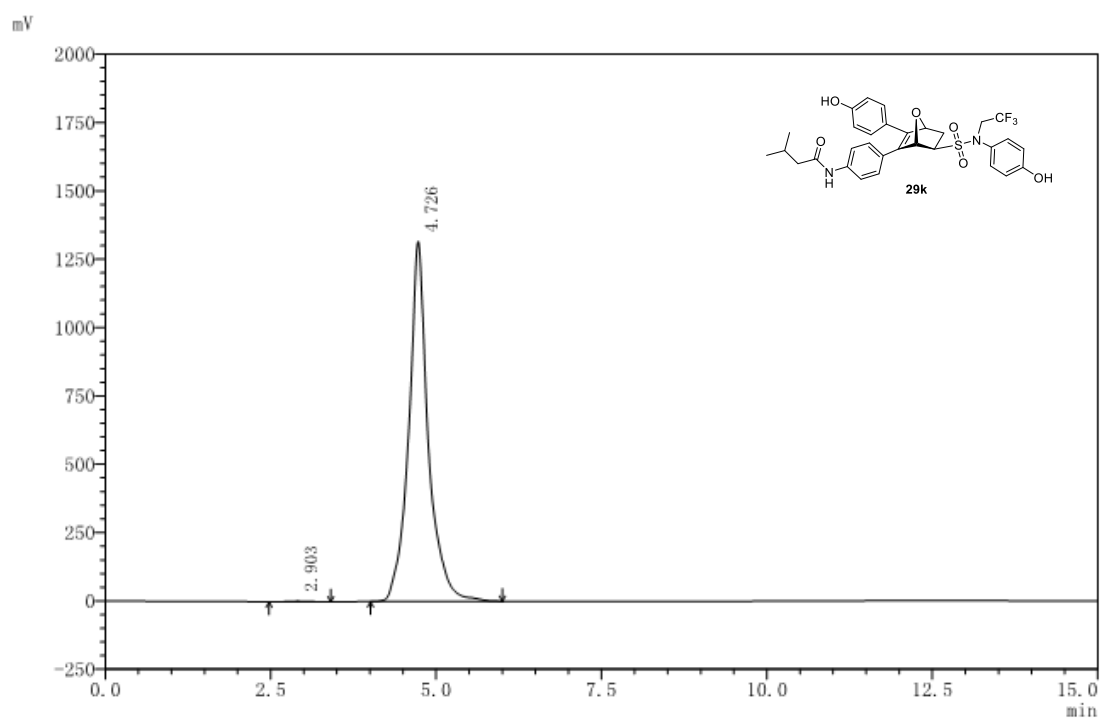

| NO. | Retention Time | Area     | Percent |
|-----|----------------|----------|---------|
| 1   | 2.903          | 35249    | 0.129   |
| 2   | 4.726          | 27201662 | 99.871  |

HRMS (ESI) calcd for  $C_{31}H_{31}F_3N_2O_6S$   $[M + H]^+$  617.1927, found 617.1924.

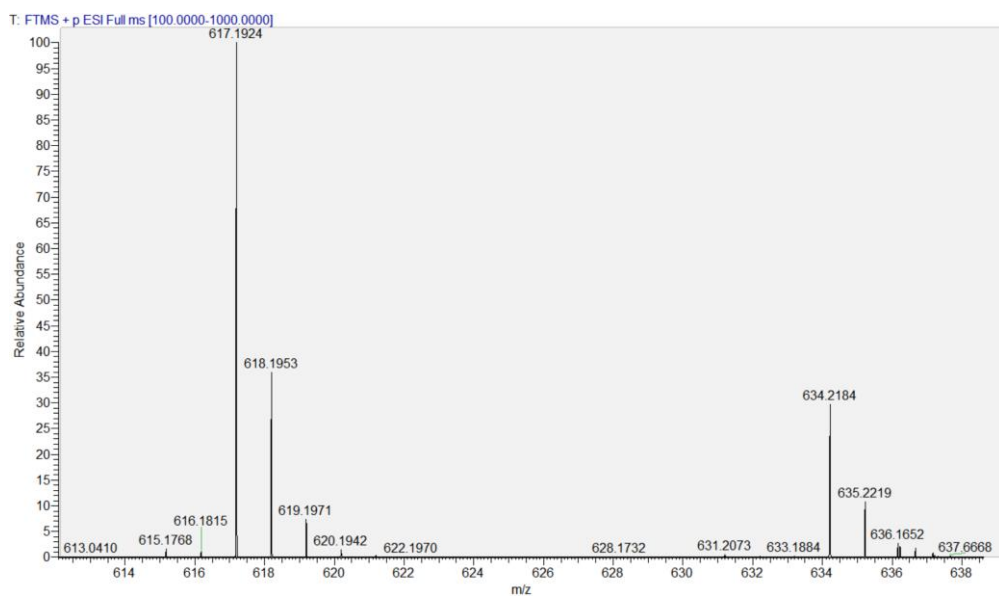

HPLC chromatogram of **29I**. Reverse Phase (Method 90:10  $CH_3OH$ :  $H_2O$ , Flow rate 0.7 mL/min).

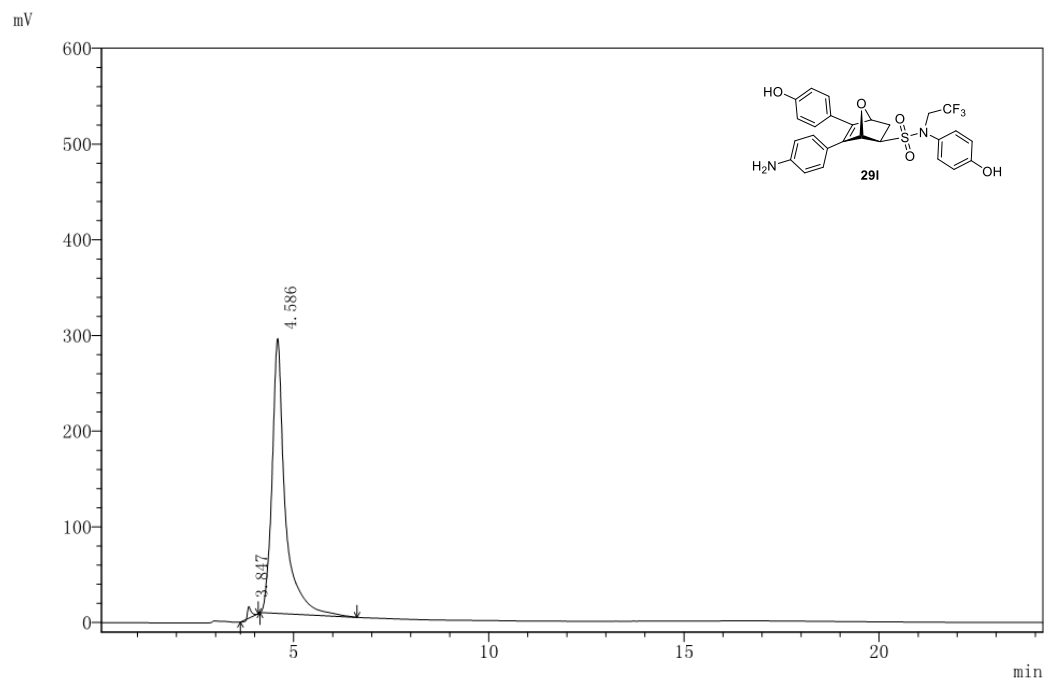

| NO. | Retention Time | Area  | Percent |
|-----|----------------|-------|---------|
| 1   | 3.847          | 70290 | 1.036   |

|       |       |         |         |
|-------|-------|---------|---------|
| 2     | 4.586 | 6713454 | 98.964  |
| Total |       |         | 100.000 |

HRMS (ESI) calcd for C<sub>26</sub>H<sub>23</sub>F<sub>3</sub>N<sub>2</sub>O<sub>5</sub>S [M + Na]<sup>+</sup> 533.1352, found 533.1350.

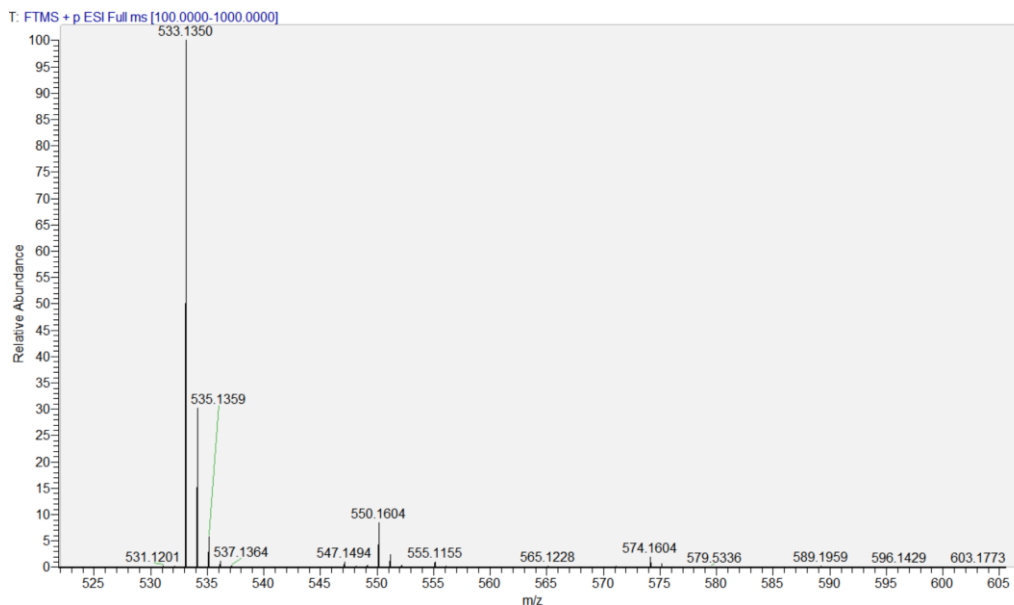

HPLC chromatogram of **29m**. Reverse Phase (Method 90:10 CH<sub>3</sub>OH: H<sub>2</sub>O, Flow rate 0.7 mL/min).

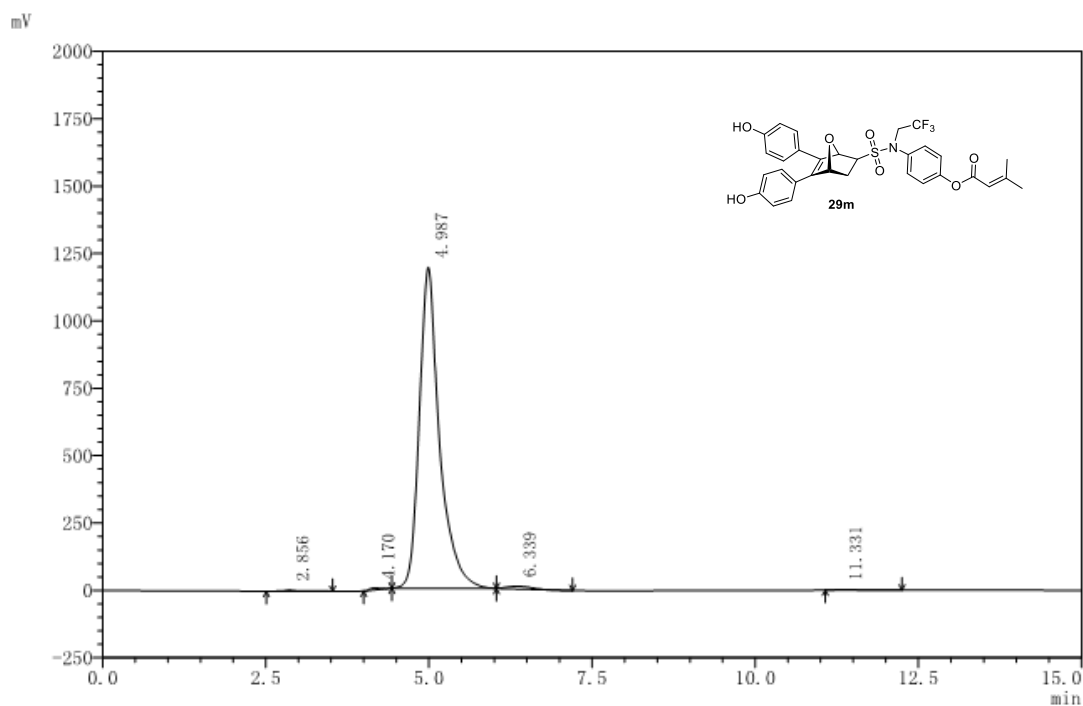

| NO. | Retention Time | Area | Percent |
|-----|----------------|------|---------|
|-----|----------------|------|---------|

---

|       |       |          |         |
|-------|-------|----------|---------|
| 1     | 2.856 | 80189    | 0.328   |
| 2     | 4.170 | 85196    | 0.327   |
| 3     | 4.987 | 25605793 | 98.417  |
| 4     | 6.339 | 246285   | 0.927   |
| Total |       |          | 100.000 |

---

HRMS (ESI) calcd for C<sub>31</sub>H<sub>28</sub>F<sub>3</sub>NO<sub>7</sub>S [M + Na]<sup>+</sup> 638.1430, found 638.1436.

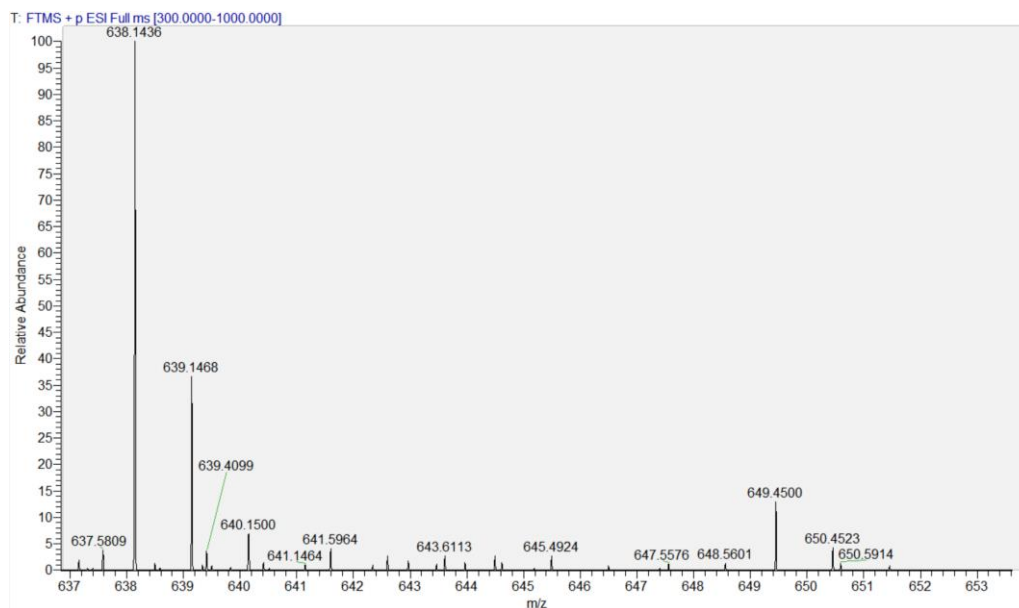

Supplement: mmc1.pdf [file mmc1.pdf]
